# Supplementary material
Source: publisher figshare collection journal article supplement (https://gsajournals.figshare.com/ndownloader/files/27479708)
Supplement: Supplementary file 1 [file 27479708]

## Sheet: iL3 vs FLF
File S6. S. stercoralis chemoreceptor differential gene expression results table: iL3s vs all other life stages
An example .xlsx results file generated by the Strongyloides RNA-seq Browser containing a differential gene expression table listing 64 S. stercoralis chemoreceptors that are consistently upregulated in iL3s versus all other life stages.
S. stercoralis RNA-seq Differential Gene Expression
Contrast: iL3-FLF
Report generated on March 13, 2021
Columns labeled with <life stage - sample ID> report log2 counts per million (CPM) expression. Columns labeled avg_<life stage> are median log2CPM with IQR. The column labeled logFC reports log2 fold change.
P-values corrected across the following multiple pairwise comparisons: iL3-FLF; iL3-iL3a; iL3-PF; iL3-pfL1; iL3-ppL1; iL3-ppL3
Lists include genes that are differentially regulated in the following directions (relative to the target life stage): Up; Down; NotSig
Percentage of genes for each differential expression pattern: 100
Lists only include genes with matching differential expression descriptions across the following pairwise comparisons: iL3-FLF; iL3-iL3a; iL3-PF; iL3-pfL1; iL3-ppL1; iL3-ppL3
DEG_Desc	geneID	iL3-ERR146947	iL3-ERR146948	iL3-ERR146949	FLF-ERR146941	FLF-ERR146942	FLF-ERR146943	avg_(iL3)	avg_(FLF)	logFC	BH.adj.P.Val	LogOdds	UniProtKB	Description	InterPro	GO_term	In.subclade_geneID	In.subclade_percent_homology	Out.subclade_geneID	Out.subclade_percent_homology	Out2.subclade_geneID	Out2.subclade_percent_homology	Ce_geneID	Ce_percent_homology
Up in iL3	SSTP_0000425800	3.68275	4.76634	4.69515	-3.9383	-3.0792	-3.33236	4.7, IQR = 4.19 to 4.73	-3.33, IQR = -3.64 to -3.21	7.81236	1.72153e-10	15.5511	A0A0K0E440	NA	GPCR_Rhodpsn, GPCR_Rhodpsn_7TM	G protein-coupled receptor signaling pathway, G protein-coupled receptor activity, integral component of membrane, membrane	SRAE_2000446700	86.4721	NA	NA	SVE_0340900	81.4324	NA	NA
Up in iL3	SSTP_0001106100	0.647601	0.821824	0.936833	-6.74677	-6.7791	-6.79213	0.82, IQR = 0.73 to 0.88	-6.78, IQR = -6.79 to -6.76	7.5662	5.09873e-11	15.7388	A0A0K0ENM4	NA	7TM_GPCR_serpentine_rcpt_Srv	membrane, integral component of membrane	SRAE_1000020300	25.5172	NA	NA	NA	NA	NA	NA
Up in iL3	SSTP_0000958500	0.68365	1.78016	1.67705	-6.74677	-4.45766	-6.79213	1.68, IQR = 1.18 to 1.73	-6.75, IQR = -6.77 to -5.6	7.35366	1.83738e-07	8.17868	A0A0K0EJD9	NA	7TM_GPCR_serpentine_rcpt_Srt	membrane, integral component of membrane	SRAE_0000002700	58.6207	SPAL_0001751500	54.8589	SVE_1105400	58.6207	srt-44	28.8401
Up in iL3	SSTP_0000443050	2.09851	2.79944	2.74474	-5.16333	-3.9728	-5.20869	2.74, IQR = 2.42 to 2.77	-5.16, IQR = -5.19 to -4.57	7.31335	1.54635e-08	10.7553	A0A0K0E4L1	NA	7TM_GPCR_serpentine_rcpt_Srt	membrane, integral component of membrane	SRAE_X000197650	63.0769	NA	NA	NA	NA	srt-43	21.9231
Up in iL3	SSTP_0000564300	1.13265	2.02748	2.1651	-3.93756	-5.19382	-6.79213	2.03, IQR = 1.58 to 2.1	-5.19, IQR = -5.99 to -4.57	7.06018	1.0717e-08	11.0335	A0A0K0E813	NA	7TM_GPCR_serpentine_rcpt_Str	membrane, integral component of membrane	SRAE_1000292700	32.6027	SPAL_0000937875	37.8082	SVE_0037600	24.9315	NA	NA
Up in iL3	SSTP_0000959400	2.11751	2.28757	2.26447	-5.16205	-5.19479	-3.98554	2.26, IQR = 2.19 to 2.28	-5.16, IQR = -5.18 to -4.57	6.99841	5.98829e-12	18.2358	A0A0K0EJE8	NA	GPCR_Rhodpsn_7TM, 7TM_GPCR_serpentine_rcpt_Srx	integral component of membrane, membrane	SRAE_0000012400	70.2875	SPAL_0000022600	61.9808	SVE_0900100	57.1885	srx-46	19.1693
Up in iL3	SSTP_0000956800	2.78265	3.84805	3.93012	-3.94137	-3.07993	-3.33481	3.85, IQR = 3.32 to 3.89	-3.33, IQR = -3.64 to -3.21	6.94593	3.03316e-09	12.5969	A0A0K0EJC2	NA	7TM_GPCR_serpentine_rcpt_Srt	membrane, integral component of membrane	NA	NA	SPAL_0001749300	59.8485	SVE_1103100	59.4697	srt-43	26.8939
Up in iL3	SSTP_0000425000	1.09557	0.810176	1.41181	-3.93925	-6.7791	-6.79213	1.1, IQR = 0.95 to 1.25	-6.78, IQR = -6.79 to -5.36	6.93245	2.94775e-08	9.94409	A0A0K0E431	Serpentine receptor class gamma	7TM_GPCR_serpentine_rcpt_Srg	sensory perception of chemical stimulus, transmembrane signaling receptor activity, membrane, integral component of membrane	SRAE_2000446900	35.119	SPAL_0000084400	48.5119	NA	NA	NA	NA
Up in iL3	SSTP_0000415000	2.87577	3.42461	3.04149	-3.57677	-3.07946	-4.47064	3.04, IQR = 2.96 to 3.23	-3.58, IQR = -4.02 to -3.33	6.82319	3.02759e-12	19.4415	A0A0K0E3T0	NA	7TM_GPCR_serpentine_rcpt_Str	membrane, integral component of membrane	NA	NA	SPAL_0000464500	71.9512	NA	NA	str-182	14.3293
Up in iL3	SSTP_0000478400	-0.744306	0.194223	0.300968	-6.74677	-6.7791	-6.79213	0.19, IQR = -0.28 to 0.25	-6.78, IQR = -6.79 to -6.76	6.66352	1.95498e-08	10.2797	A0A0K0E5J8	NA	NA	membrane, integral component of membrane	SRAE_2000422600	55.0955	SPAL_0000260300	32.1656	SVE_0059100	22.9299	NA	NA
Up in iL3	SSTP_0000381900	2.00782	2.70187	2.64818	-5.16173	-3.60995	-3.62268	2.65, IQR = 2.33 to 2.68	-3.62, IQR = -4.39 to -3.62	6.56495	3.17092e-10	14.7396	A0A0K0E2V0	NA	7TM_GPCR_serpentine_rcpt_Sre	sensory perception of chemical stimulus, integral component of membrane, membrane	SRAE_2000482900	81.7629	SPAL_0000606300	65.6535	SVE_1566000	66.8693	NA	NA
Up in iL3	SSTP_0000113900	1.27386	1.19763	1.63518	-4.43272	-5.19189	-5.21067	1.27, IQR = 1.24 to 1.45	-5.19, IQR = -5.2 to -4.81	6.30289	1.46759e-09	13.0214	A0A0K0DV71	NA	NA	membrane, integral component of membrane	SRAE_2000471650	78.8732	NA	NA	SVE_0341200	64.7887	NA	NA
Up in iL3	SSTP_0000207250	0.925011	0.000409147	0.122625	-3.93844	-6.7791	-6.79213	0.12, IQR = 0.06 to 0.52	-6.78, IQR = -6.79 to -5.36	6.20851	2.40116e-07	7.89671	A0A0K0DXV8	NA	GPCR_Rhodpsn_7TM, 7TM_GPCR_serpentine_rcpt_Srd	integral component of membrane, membrane	SRAE_2000412500	16.5803	SPAL_0001736700	29.7927	NA	NA	NA	NA
Up in iL3	SSTP_0000346000	5.6919	5.23809	5.64086	-0.655889	-0.475224	-0.654479	5.64, IQR = 5.44 to 5.67	-0.65, IQR = -0.66 to -0.56	6.11765	3.32052e-13	23.0454	A0A0K0E1U1	Serpentine receptor class gamma	7TM_GPCR_serpentine_rcpt_Srg	sensory perception of chemical stimulus, transmembrane signaling receptor activity, membrane, integral component of membrane	SRAE_1000032000	78.4	SPAL_0000389200	73.6	SVE_1157700	77.6	NA	NA
Up in iL3	SSTP_0000385000	0.964404	0.334184	0.568923	-4.42501	-6.7791	-5.20757	0.57, IQR = 0.45 to 0.77	-5.21, IQR = -5.99 to -4.82	6.10433	2.4727e-07	7.90597	A0A0K0E2Y1	NA	7TM_GPCR_serpentine_rcpt_Sre	sensory perception of chemical stimulus, integral component of membrane, membrane	SRAE_2000498600	74.4108	NA	NA	NA	NA	NA	NA
Up in iL3	SSTP_0000554700	1.879	1.69275	2.19971	-5.1615	-3.97175	-3.33271	1.88, IQR = 1.79 to 2.04	-3.97, IQR = -4.57 to -3.65	6.06292	3.28036e-09	12.3963	A0A0K0E7S2	NA	NA	membrane, integral component of membrane	SRAE_1000279900	60.0649	SPAL_0000683400	55.5195	SVE_0863100	66.8831	NA	NA
Up in iL3	SSTP_0001111100	-0.305668	-0.328571	-0.078374	-5.16286	-6.7791	-6.79213	-0.31, IQR = -0.32 to -0.19	-6.78, IQR = -6.79 to -5.97	6.00017	3.12036e-09	11.9983	A0A0K0ENS4	NA	GPCR_Rhodpsn_7TM, 7TM_GPCR_serpentine_rcpt_Srx	integral component of membrane, membrane	SRAE_2000476900	56.5693	SPAL_0001229232	55.1095	SVE_1000654750	63.5037	NA	NA
Up in iL3	SSTP_0000937700	-0.744349	-0.132417	-0.449568	-6.74677	-6.7791	-5.2082	-0.45, IQR = -0.6 to -0.29	-6.75, IQR = -6.76 to -5.98	5.79783	1.56696e-08	10.4666	A0A0K0EIS1	NA	7TM_GPCR_serpentine_rcpt_Sre	sensory perception of chemical stimulus, integral component of membrane, membrane	SRAE_2000494100	50.6711	SPAL_0001434200	35.5705	SVE_0337000	40.9396	NA	NA
Up in iL3	SSTP_0000382000	-0.507025	0.334541	0.260028	-5.16166	-6.7791	-5.20732	0.26, IQR = -0.12 to 0.3	-5.21, IQR = -5.99 to -5.18	5.72766	3.26865e-09	12.0052	A0A0K0E2V1	NA	GPCR_Rhodpsn_7TM, 7TM_GPCR_serpentine_rcpt_Srv, Srg-33-like	sensory perception of chemical stimulus, transmembrane signaling receptor activity, integral component of membrane, membrane	SRAE_2000482800	47.6974	SPAL_0000062700	30.9211	SVE_0238100	31.5789	NA	NA
Up in iL3	SSTP_0000836800	1.93034	2.35566	2.85463	-3.28626	-2.53152	-3.98447	2.36, IQR = 2.14 to 2.61	-3.29, IQR = -3.64 to -2.91	5.62192	2.80111e-08	10.2678	A0A0K0EFW1	NA	7TM_GPCR_serpentine_rcpt_Srt	membrane, integral component of membrane	SRAE_1000322800	47.0588	SPAL_0001660500	38.0952	SVE_1947200	37.2549	NA	NA
Up in iL3	SSTP_0000941900	1.8254	0.946637	1.48743	-4.42468	-3.60993	-4.47058	1.49, IQR = 1.22 to 1.66	-4.42, IQR = -4.45 to -4.02	5.59267	5.08155e-10	14.2199	A0A0K0EIW3	NA	7TM_GPCR_serpentine_rcpt_Srv	membrane, integral component of membrane	SRAE_2000512000	71.6867	SPAL_0000410300	65.9639	SVE_1570600	43.0723	NA	NA
Up in iL3	SSTP_0000423100	0.797885	0.94634	1.18189	-3.93968	-4.45784	-5.2077	0.95, IQR = 0.87 to 1.06	-4.46, IQR = -4.83 to -4.2	5.50097	8.47823e-08	9.04474	A0A0K0E414	NA	GPCR_Rhodpsn, GPCR_Rhodpsn_7TM, 7TM_GPCR_serpentine_rcpt_Srv, Srg-33-like	G protein-coupled receptor signaling pathway, G protein-coupled receptor activity, sensory perception of chemical stimulus, transmembrane signaling receptor activity, integral component of membrane, membrane	NA	NA	NA	NA	SVE_1568900	50	NA	NA
Up in iL3	SSTP_0000543000	0.659146	1.55632	2.16386	-4.42495	-4.45819	-3.33346	1.56, IQR = 1.11 to 1.86	-4.42, IQR = -4.44 to -3.88	5.48566	2.69283e-06	5.54185	A0A0K0E7F3	NA	7TM_GPCR_serpentine_rcpt_Str	membrane, integral component of membrane	SRAE_1000230900	55.6548	SPAL_0000380400	50	SVE_1276100	48.2143	NA	NA
Up in iL3	SSTP_0000537400	0.883331	1.67875	1.77146	-4.42535	-3.60963	-3.98557	1.68, IQR = 1.28 to 1.73	-3.99, IQR = -4.21 to -3.8	5.4259	1.23104e-08	11.0497	A0A0K0E798	NA	7TM_GPCR_serpentine_rcpt_Srd	membrane, integral component of membrane	SRAE_2000459500	55.0523	SPAL_0000036900	14.9826	SVE_0266000	43.554	NA	NA
Up in iL3	SSTP_0000425400	1.13079	2.19925	2.5927	-3.04738	-3.60875	-3.62305	2.2, IQR = 1.67 to 2.4	-3.61, IQR = -3.62 to -3.33	5.36117	5.97475e-08	9.4747	A0A0K0E435	Serpentine receptor class gamma	7TM_GPCR_serpentine_rcpt_Srg	sensory perception of chemical stimulus, transmembrane signaling receptor activity, membrane, integral component of membrane	NA	NA	NA	NA	NA	NA	NA	NA
Up in iL3	SSTP_0000020000	0.681081	0.68302	1.35338	-3.29042	-4.45874	-5.20934	0.68, IQR = 0.68 to 1.02	-4.46, IQR = -4.83 to -3.87	5.2065	2.97399e-08	10.1088	A0A0K0DSI8	Serpentine receptor class gamma	7TM_GPCR_serpentine_rcpt_Srg	sensory perception of chemical stimulus, transmembrane signaling receptor activity, membrane, integral component of membrane	SRAE_1000236400	73.3068	SPAL_0000368200	62.9482	NA	NA	NA	NA
Up in iL3	SSTP_0001159500	1.82741	2.02805	2.45359	-2.83667	-3.31967	-3.08984	2.03, IQR = 1.93 to 2.24	-3.09, IQR = -3.2 to -2.96	5.16662	9.82425e-10	13.782	A0A0K0EQ66	NA	GPCR_Rhodpsn, GPCR_Rhodpsn_7TM, 7TM_GPCR_serpentine_rcpt_Srw	G protein-coupled peptide receptor activity, G protein-coupled receptor signaling pathway, G protein-coupled receptor activity, integral component of membrane, membrane	NA	NA	NA	NA	NA	NA	NA	NA
Up in iL3	SSTP_0001190900	4.30874	4.56429	4.65641	-0.866766	-0.513756	-0.385335	4.56, IQR = 4.44 to 4.61	-0.51, IQR = -0.69 to -0.45	5.09045	7.07214e-13	22.1419	A0A0K0ER27	NA	7TM_GPCR_serpentine_rcpt_Srv	membrane, integral component of membrane	SRAE_1000075200	94.5312	SPAL_0000744100	94.9219	SVE_1021000	94.5312	NA	NA
Up in iL3	SSTP_0000356800	0.683939	0.989737	1.08824	-4.42447	-4.45746	-3.62232	0.99, IQR = 0.84 to 1.04	-4.42, IQR = -4.44 to -4.02	5.07575	4.04592e-09	12.1406	A0A0K0E247	NA	7TM_GPCR_serpentine_rcpt_Sri	membrane, integral component of membrane	SRAE_2000169600	55.5901	NA	NA	SVE_1996600	20.4969	NA	NA
Up in iL3	SSTP_0000370900	-0.35212	0.367691	0.421304	-4.42399	-6.7791	-3.62203	0.37, IQR = 0.01 to 0.39	-4.42, IQR = -5.6 to -4.02	5.06747	9.38537e-08	8.88796	A0A0K0E2J1	NA	7TM_GPCR_serpentine_rcpt_Srv, Srg-33-like	sensory perception of chemical stimulus, transmembrane signaling receptor activity, membrane, integral component of membrane	NA	NA	SPAL_0001029300	62.6374	SVE_0495300	31.044	NA	NA
Up in iL3	SSTP_0001182400	0.271504	1.10941	0.851178	-4.42579	-3.97289	-4.47146	0.85, IQR = 0.56 to 0.98	-4.43, IQR = -4.45 to -4.2	5.0204	1.55994e-07	8.44361	A0A0K0EQU3	NA	GPCR_Rhodpsn_7TM, 7TM_GPCR_serpentine_rcpt_Srx	integral component of membrane, membrane	SRAE_1000256800	77.7027	SPAL_0000865400	66.8919	SVE_1042900	66.5541	srx-47	17.5676
Up in iL3	SSTP_0000247200	1.78198	1.84021	1.52399	-3.04564	-3.32008	-2.88521	1.78, IQR = 1.65 to 1.81	-3.05, IQR = -3.18 to -2.97	4.80806	2.07289e-08	10.5851	A0A0K0DZ05	NA	7TM_GPCR_serpentine_rcpt_Srd	membrane, integral component of membrane	SRAE_X000025200	41.2979	SPAL_0001774800	25.0737	SVE_0113600	54.8673	NA	NA
Up in iL3	SSTP_0000479900	5.11669	5.05997	5.12674	0.0779986	0.533994	0.350284	5.12, IQR = 5.09 to 5.12	0.35, IQR = 0.21 to 0.44	4.77874	2.16432e-14	26.9453	A0A0K0E5L3	NA	GPCR_Rhodpsn_7TM	integral component of membrane, membrane	SRAE_2000421000	57.7259	SPAL_0000141100	52.7697	SVE_0883800	53.0612	C47E8.3	21.137
Up in iL3	SSTP_0001016200	1.40321	1.7157	1.94285	-2.85637	-3.31954	-2.7156	1.72, IQR = 1.56 to 1.83	-2.86, IQR = -3.09 to -2.79	4.63517	4.44869e-09	12.207	A0A0K0EL18	NA	NA	membrane, integral component of membrane	NA	NA	NA	NA	NA	NA	NA	NA
Up in iL3	SSTP_0001115800	-1.378	-0.132185	-0.597563	-5.1624	-6.7791	-3.98589	-0.6, IQR = -0.99 to -0.36	-5.16, IQR = -5.97 to -4.57	4.59121	1.65904e-06	6.00721	A0A0K0ENX1	NA	7TM_GPCR_serpentine_rcpt_Sre	sensory perception of chemical stimulus, integral component of membrane, membrane	SRAE_2000450200	28.2392	SPAL_0000411500	46.8439	SVE_1569200	46.5116	NA	NA
Up in iL3	SSTP_0000964100	7.0681	7.4944	7.16413	2.32015	3.00057	2.63409	7.16, IQR = 7.12 to 7.33	2.63, IQR = 2.48 to 2.82	4.58949	2.28664e-14	27.3519	A0A0K0EJJ5	NA	GPCR_Rhodpsn, GPCR_Rhodpsn_7TM, 7TM_GPCR_serpentine_rcpt_Srw	G protein-coupled peptide receptor activity, G protein-coupled receptor signaling pathway, G protein-coupled receptor activity, integral component of membrane, membrane	SRAE_2000425500	91.9626	SPAL_0000136500	87.2897	SVE_0655900	87.2897	dmsr-1	44.2991
Up in iL3	SSTP_0000166700	0.140459	-0.553361	0.907775	-5.16119	-3.60928	-4.46999	0.14, IQR = -0.21 to 0.52	-4.47, IQR = -4.82 to -4.04	4.54686	2.37839e-06	5.67265	A0A0K0DWQ0	NA	7TM_GPCR_serpentine_rcpt_Str	membrane, integral component of membrane	SRAE_0000000250	65.0602	SPAL_0000619700	44.5783	SVE_1102400	19.8795	NA	NA
Up in iL3	SSTP_0000554600	0.240778	0.578202	0.2592	-3.93894	-4.45758	-3.98487	0.26, IQR = 0.25 to 0.42	-3.98, IQR = -4.22 to -3.96	4.48871	9.59756e-09	11.2507	A0A0K0E7S1	NA	NA	membrane, integral component of membrane	SRAE_1000280000	72.0721	SPAL_0001687000	63.6637	SVE_0863000	59.1592	NA	NA
Up in iL3	SSTP_0001161000	4.29338	4.23701	4.53664	-0.173196	0.0912674	-0.160574	4.29, IQR = 4.27 to 4.42	-0.16, IQR = -0.17 to -0.03	4.43033	6.62074e-14	25.2232	A0A0K0EQ81	NA	GPCR_Rhodpsn, GPCR_Rhodpsn_7TM, 7TM_GPCR_serpentine_rcpt_Srw	G protein-coupled peptide receptor activity, G protein-coupled receptor signaling pathway, G protein-coupled receptor activity, integral component of membrane, membrane	SRAE_1000078900	75.492	SPAL_0000736000	71.1986	SVE_1029300	72.6297	dmsr-8	29.1592
Up in iL3	SSTP_0000697000	5.6913	5.94111	6.38069	1.37985	1.93828	1.43314	5.94, IQR = 5.82 to 6.16	1.43, IQR = 1.41 to 1.69	4.41185	3.0597e-13	23.4988	A0A0K0EBV0	NA	NA	membrane, integral component of membrane	SRAE_2000389700	87.4439	SPAL_0000874100	82.7354	SVE_0731300	84.7534	NA	NA
Up in iL3	SSTP_0000431100	3.47919	3.60611	3.15428	-0.677327	-1.22459	-0.812928	3.48, IQR = 3.32 to 3.54	-0.81, IQR = -1.02 to -0.75	4.32876	1.31114e-11	18.7137	A0A0K0E492	NA	GPCR_Rhodpsn, GPCR_Rhodpsn_7TM	G protein-coupled receptor signaling pathway, G protein-coupled receptor activity, integral component of membrane, membrane	SRAE_X000170800	77.3512	SPAL_0000358300	72.3608	SVE_0664200	69.0979	NA	NA
Up in iL3	SSTP_0000363000	2.756	3.25524	3.39015	-1.38939	-1.10758	-1.12044	3.26, IQR = 3.01 to 3.32	-1.12, IQR = -1.25 to -1.11	4.32377	6.75845e-12	19.3872	A0A0K0E2A8	NA	GPCR_Rhodpsn, 7TM_GPCR_Srsx	G protein-coupled receptor signaling pathway, G protein-coupled receptor activity, integral component of membrane, membrane	SRAE_2000474200	89.0282	SPAL_0001079400	81.5047	SVE_1655800	81.1912	NA	NA
Up in iL3	SSTP_0000209200	0.941496	0.656267	1.3135	-3.05042	-3.32129	-3.6257	0.94, IQR = 0.8 to 1.13	-3.32, IQR = -3.47 to -3.19	4.28932	3.21792e-09	12.4858	A0A0K0DXX8	Serpentine receptor class gamma	7TM_GPCR_serpentine_rcpt_Srg	sensory perception of chemical stimulus, transmembrane signaling receptor activity, membrane, integral component of membrane	SRAE_2000414400	69.7368	NA	NA	SVE_2022200	42.9825	NA	NA
Up in iL3	SSTP_0001196800	1.91138	1.98653	2.56709	-2.00189	-1.92328	-2.1562	1.99, IQR = 1.95 to 2.28	-2, IQR = -2.08 to -1.96	4.16131	2.77669e-10	15.2273	A0A0K0ER83	NA	7TM_GPCR_serpentine_rcpt_Srd	membrane, integral component of membrane	SRAE_1000223600	62.9412	SPAL_0001395500	47.0588	SVE_1826000	42.3529	NA	NA
Up in iL3	SSTP_0000697300	4.61177	5.00972	5.10921	0.437172	0.900455	0.945021	5.01, IQR = 4.81 to 5.06	0.9, IQR = 0.67 to 0.92	4.13952	3.25682e-12	20.5169	A0A0K0EBV3	NA	Globin/Proto	oxygen binding, heme binding, membrane, integral component of membrane	SRAE_2000389400	91.1223	SPAL_0000873900	82.2446	SVE_0731600	84.5896	glb-33	31.1558
Up in iL3	SSTP_0001168000	-1.28197	-0.554985	-1.72013	-6.74677	-3.97304	-5.20813	-1.28, IQR = -1.5 to -0.92	-5.21, IQR = -5.98 to -4.59	4.13546	5.66993e-06	4.77843	A0A0K0EQF1	NA	7TM_GPCR_serpentine_rcpt_Srv	membrane, integral component of membrane	SRAE_1000020200	58.147	SPAL_0001545000	65.8147	SVE_0338500	58.7859	NA	NA
Up in iL3	SSTP_0000872100	2.94727	3.41707	3.67852	-1.1316	-0.240713	-1.01102	3.42, IQR = 3.18 to 3.55	-1.01, IQR = -1.07 to -0.63	4.12352	4.28933e-09	12.3222	A0A0K0EGW1	NA	NA	membrane, integral component of membrane	SRAE_X000010100	95.3216	SPAL_0000526900	91.8129	SVE_0623400	90.9357	NA	NA
Up in iL3	SSTP_0001185400	3.27545	3.90788	3.87685	-0.405148	-0.240403	-0.221545	3.88, IQR = 3.58 to 3.89	-0.24, IQR = -0.32 to -0.23	3.96305	4.93852e-11	17.2833	A0A0K0EQX3	NA	GPCR_Rhodpsn_7TM	integral component of membrane, membrane	SRAE_1000259700	83.5821	SPAL_0000172100	77.6119	NA	NA	NA	NA
Up in iL3	SSTP_0001173300	2.81137	2.66233	2.6151	-1.61803	-1.2255	-0.684631	2.66, IQR = 2.64 to 2.74	-1.23, IQR = -1.42 to -0.96	3.87475	1.44503e-10	16.0217	NA	NA	NA	NA	SRAE_0000033100	72.6384	SPAL_0001592300	71.3355	SVE_0997500	75.57	H09F14.1	33.2248
Up in iL3	SSTP_0000993200	3.34598	4.03696	3.50654	-0.267671	-0.512392	0.307844	3.51, IQR = 3.43 to 3.77	-0.27, IQR = -0.39 to 0.02	3.78588	1.71789e-10	15.8938	A0A0K0EKD8	NA	GPCR_Rhodpsn_7TM	integral component of membrane, membrane	SRAE_1000101200	83.6852	SPAL_0000244000	76.5835	SVE_0001600	76.5835	T11F9.1	33.5893
Up in iL3	SSTP_0001110100	0.302488	-0.495532	0.0269276	-3.94118	-4.45804	-3.09361	0.03, IQR = -0.23 to 0.16	-3.94, IQR = -4.2 to -3.52	3.77756	2.04404e-05	3.46667	A0A0K0ENR4	NA	NA	membrane, integral component of membrane	SRAE_2000478200	55.7252	SPAL_0000669600	59.1603	SVE_1184100	58.3969	NA	NA
Up in iL3	SSTP_0001115900	0.422742	1.87416	1.98078	-2.49892	-1.73559	-1.93481	1.87, IQR = 1.15 to 1.93	-1.93, IQR = -2.22 to -1.84	3.43861	1.91448e-06	5.83196	A0A0K0ENX2	NA	GPCR_Rhodpsn_7TM, 7TM_GPCR_Srsx	integral component of membrane, membrane	SRAE_2000450100	48.4472	SPAL_0000411600	19.5652	NA	NA	NA	NA
Up in iL3	SSTP_0001111200	-0.16926	-0.616918	-0.948602	-4.42495	-3.60972	-3.62276	-0.62, IQR = -0.78 to -0.39	-3.62, IQR = -4.02 to -3.62	3.32501	6.45478e-06	4.65396	A0A0K0ENS5	NA	GPCR_Rhodpsn_7TM, 7TM_GPCR_serpentine_rcpt_Srx	integral component of membrane, membrane	NA	NA	SPAL_0001229216	40.5844	SVE_2022700	36.039	NA	NA
Up in iL3	SSTP_0000442300	3.49527	3.98386	3.99787	1.05586	0.533306	0.197245	3.98, IQR = 3.74 to 3.99	0.53, IQR = 0.37 to 0.79	3.22306	2.36515e-10	15.5262	A0A0K0E4K3	NA	GPCR_Rhodpsn, GPCR_Rhodpsn_7TM, 7TM_GPCR_serpentine_rcpt_Srx	G protein-coupled receptor signaling pathway, G protein-coupled receptor activity, integral component of membrane, membrane	SRAE_X000198500	92.4812	SPAL_0000671400	86.2155	SVE_0112700	85.7143	npr-19	55.6391
Up in iL3	SSTP_0001065400	-0.949065	-0.274961	-0.13351	-3.04552	-3.609	-3.9845	-0.27, IQR = -0.61 to -0.2	-3.61, IQR = -3.8 to -3.33	3.0765	8.93742e-05	1.95344	A0A0K0EMG5	NA	7TM_GPCR_serpentine_rcpt_Srx	membrane, integral component of membrane	NA	NA	NA	NA	SVE_0366100	54.7468	NA	NA
Up in iL3	SSTP_0001016700	1.6156	1.20321	0.934742	-1.46244	-0.998847	-1.58408	1.2, IQR = 1.07 to 1.41	-1.46, IQR = -1.52 to -1.23	2.61966	1.91102e-07	8.24367	A0A0K0EL23	NA	NA	membrane, integral component of membrane	SRAE_2000432400	64.3836	SPAL_0001382700	61.9863	SVE_0272200	50.6849	NA	NA
Up in iL3	SSTP_0000860100	2.27621	2.33817	2.42656	-1.32071	-0.180112	0.722798	2.34, IQR = 2.31 to 2.38	-0.18, IQR = -0.75 to 0.27	2.59528	4.721e-06	4.69274	A0A0K0EGI9	NA	7TM_GPCR_serpentine_rcpt_Srv	membrane, integral component of membrane	SRAE_X000039900	44.0252	NA	NA	NA	NA	NA	NA
Up in iL3	SSTP_0001086200	1.80343	1.95184	2.51933	-0.816145	-0.0935064	-0.222971	1.95, IQR = 1.88 to 2.24	-0.22, IQR = -0.52 to -0.16	2.44414	1.62448e-07	8.34568	A0A0K0EN24	NA	7TM_GPCR_serpentine_rcpt_Srv	membrane, integral component of membrane	SRAE_1000111700	80.6854	SPAL_0000276400	73.2087	SVE_0085400	67.6012	NA	NA
Up in iL3	SSTP_0001007400	0.609891	0.157795	-0.134617	-1.70267	-1.57058	-2.70546	0.16, IQR = 0.01 to 0.38	-1.7, IQR = -2.2 to -1.64	2.22691	2.22845e-05	3.2836	A0A0K0EKT3	NA	GPCR_Rhodpsn, GPCR_Rhodpsn_7TM, 7TM_GPCR_Srsx	G protein-coupled receptor signaling pathway, G protein-coupled receptor activity, integral component of membrane, membrane	SRAE_2000105700	77.4603	NA	NA	SVE_0515000	70.7936	srsx-25	39.3651
Up in iL3	SSTP_0000686100	0.272078	1.23961	1.72445	-1.19267	-0.671563	-1.43555	1.24, IQR = 0.76 to 1.48	-1.19, IQR = -1.31 to -0.93	2.13643	3.29201e-05	2.77058	A0A0K0EBI9	NA	7TM_GPCR_serpentine_rcpt_Srx	membrane, integral component of membrane	SRAE_2000514400	56.9579	SPAL_0000982400	52.1036	SVE_1573100	42.3948	NA	NA
Up in iL3	SSTP_0001250400	4.05255	4.00004	4.35552	1.73531	2.44697	1.9198	4.05, IQR = 4.03 to 4.2	1.92, IQR = 1.83 to 2.18	2.09335	5.68837e-09	11.8017	A0A0K0ESS4	NA	GPCR_Rhodpsn_7TM	integral component of membrane, membrane	SRAE_X000114200	94.4573	SPAL_0000696000	86.836	SVE_0624200	86.836	ZK1307.7	44.1109
Up in iL3	SSTP_0000607500	-0.0857237	0.0409005	0.668609	-1.61757	-1.42243	-2.26922	0.04, IQR = -0.02 to 0.35	-1.62, IQR = -1.94 to -1.52	1.95549	0.000365154	0.36157	A0A0K0E991	NA	7TM_GPCR_serpentine_rcpt_Srx	membrane, integral component of membrane	NA	NA	SPAL_0001210700	38.5093	SVE_0642600	32.2981	NA	NA
Up in iL3	SSTP_0000287100	1.74869	2.79637	2.34691	0.754891	0.797868	0.609505	2.35, IQR = 2.05 to 2.57	0.75, IQR = 0.68 to 0.78	1.56525	3.77692e-06	4.83568	A0A0K0E055	NA	GPCR_Rhodpsn, GPCR_Rhodpsn_7TM	G protein-coupled receptor signaling pathway, G protein-coupled receptor activity, integral component of membrane, membrane	SRAE_1000159300	90.099	SPAL_0000795200	85.1485	SVE_1056900	79.2079	F32D8.10	37.1287
Up in iL3	SSTP_0001059800	3.22706	3.63213	3.51185	1.66848	2.11218	2.24465	3.51, IQR = 3.37 to 3.57	2.11, IQR = 1.89 to 2.18	1.4415	5.62142e-06	4.20205	A0A0K0EMB0	NA	GPCR_Rhodpsn_7TM	integral component of membrane, membrane	SRAE_X000186100	86.2595	SPAL_0001467100	82.9517	SVE_0819600	47.0738	Y37E11AL.1	40.7125

## Sheet: iL3 vs iL3a
File S6. S. stercoralis chemoreceptor differential gene expression results table: iL3s vs all other life stages
An example .xlsx results file generated by the Strongyloides RNA-seq Browser containing a differential gene expression table listing 64 S. stercoralis chemoreceptors that are consistently upregulated in iL3s versus all other life stages.
S. stercoralis RNA-seq Differential Gene Expression
Contrast: iL3-iL3a
Report generated on March 13, 2021
Columns labeled with <life stage - sample ID> report log2 counts per million (CPM) expression. Columns labeled avg_<life stage> are median log2CPM with IQR. The column labeled logFC reports log2 fold change.
P-values corrected across the following multiple pairwise comparisons: iL3-FLF; iL3-iL3a; iL3-PF; iL3-pfL1; iL3-ppL1; iL3-ppL3
Lists include genes that are differentially regulated in the following directions (relative to the target life stage): Up; Down; NotSig
Percentage of genes for each differential expression pattern: 100
Lists only include genes with matching differential expression descriptions across the following pairwise comparisons: iL3-FLF; iL3-iL3a; iL3-PF; iL3-pfL1; iL3-ppL1; iL3-ppL3
DEG_Desc	geneID	iL3-ERR146947	iL3-ERR146948	iL3-ERR146949	iL3a-ERR146944	iL3a-ERR146945	iL3a-ERR146946	avg_(iL3)	avg_(iL3a)	logFC	BH.adj.P.Val	LogOdds	UniProtKB	Description	InterPro	GO_term	In.subclade_geneID	In.subclade_percent_homology	Out.subclade_geneID	Out.subclade_percent_homology	Out2.subclade_geneID	Out2.subclade_percent_homology	Ce_geneID	Ce_percent_homology
Up in iL3	SSTP_0000537400	0.883331	1.67875	1.77146	-7.17241	-5.43842	-7.08502	1.68, IQR = 1.28 to 1.73	-7.09, IQR = -7.13 to -6.26	7.98564	5.60118e-09	13.1174	A0A0K0E798	NA	7TM_GPCR_serpentine_rcpt_Srd	membrane, integral component of membrane	SRAE_2000459500	55.0523	SPAL_0000036900	14.9826	SVE_0266000	43.554	NA	NA
Up in iL3	SSTP_0000543000	0.659146	1.55632	2.16386	-3.71317	-7.02366	-2.44153	1.56, IQR = 1.11 to 1.86	-3.71, IQR = -5.37 to -3.08	5.78751	3.34423e-06	6.22875	A0A0K0E7F3	NA	7TM_GPCR_serpentine_rcpt_Str	membrane, integral component of membrane	SRAE_1000230900	55.6548	SPAL_0000380400	50	SVE_1276100	48.2143	NA	NA
Up in iL3	SSTP_0001159500	1.82741	2.02805	2.45359	-2.77901	-2.37599	-3.62713	2.03, IQR = 1.93 to 2.24	-2.78, IQR = -3.2 to -2.58	5.01325	3.35358e-09	14.3263	A0A0K0EQ66	NA	GPCR_Rhodpsn, GPCR_Rhodpsn_7TM, 7TM_GPCR_serpentine_rcpt_Srw	G protein-coupled peptide receptor activity, G protein-coupled receptor signaling pathway, G protein-coupled receptor activity, integral component of membrane, membrane	NA	NA	NA	NA	NA	NA	NA	NA
Up in iL3	SSTP_0001110100	0.302488	-0.495532	0.0269276	-4.00266	-3.85459	-7.08502	0.03, IQR = -0.23 to 0.16	-4, IQR = -5.54 to -3.93	4.92701	5.63059e-06	5.63655	A0A0K0ENR4	NA	NA	membrane, integral component of membrane	SRAE_2000478200	55.7252	SPAL_0000669600	59.1603	SVE_1184100	58.3969	NA	NA
Up in iL3	SSTP_0000425000	1.09557	0.810176	1.41181	-2.64873	-4.70088	-2.69275	1.1, IQR = 0.95 to 1.25	-2.69, IQR = -3.7 to -2.67	4.42557	4.7647e-07	8.4612	A0A0K0E431	Serpentine receptor class gamma	7TM_GPCR_serpentine_rcpt_Srg	sensory perception of chemical stimulus, transmembrane signaling receptor activity, membrane, integral component of membrane	SRAE_2000446900	35.119	SPAL_0000084400	48.5119	NA	NA	NA	NA
Up in iL3	SSTP_0000554700	1.879	1.69275	2.19971	-2.31348	-2.49874	-1.95417	1.88, IQR = 1.79 to 2.04	-2.31, IQR = -2.41 to -2.13	4.16605	4.38476e-08	11.2671	A0A0K0E7S2	NA	NA	membrane, integral component of membrane	SRAE_1000279900	60.0649	SPAL_0000683400	55.5195	SVE_0863100	66.8831	NA	NA
Up in iL3	SSTP_0001106100	0.647601	0.821824	0.936833	-3.26944	-2.94914	-2.99058	0.82, IQR = 0.73 to 0.88	-2.99, IQR = -3.13 to -2.97	3.86587	1.91127e-08	12.2114	A0A0K0ENM4	NA	7TM_GPCR_serpentine_rcpt_Srv	membrane, integral component of membrane	SRAE_1000020300	25.5172	NA	NA	NA	NA	NA	NA
Up in iL3	SSTP_0000385000	0.964404	0.334184	0.568923	-2.92391	-2.77498	-2.99608	0.57, IQR = 0.45 to 0.77	-2.92, IQR = -2.96 to -2.85	3.53058	9.17736e-06	5.04338	A0A0K0E2Y1	NA	7TM_GPCR_serpentine_rcpt_Sre	sensory perception of chemical stimulus, integral component of membrane, membrane	SRAE_2000498600	74.4108	NA	NA	NA	NA	NA	NA
Up in iL3	SSTP_0000478400	-0.744306	0.194223	0.300968	-2.64929	-4.21626	-3.62565	0.19, IQR = -0.28 to 0.25	-3.63, IQR = -3.92 to -3.14	3.37589	8.24015e-06	5.20045	A0A0K0E5J8	NA	NA	membrane, integral component of membrane	SRAE_2000422600	55.0955	SPAL_0000260300	32.1656	SVE_0059100	22.9299	NA	NA
Up in iL3	SSTP_0000370900	-0.35212	0.367691	0.421304	-3.26507	-3.11504	-2.99786	0.37, IQR = 0.01 to 0.39	-3.12, IQR = -3.19 to -3.06	3.25316	3.60908e-06	6.12981	A0A0K0E2J1	NA	7TM_GPCR_serpentine_rcpt_Srv, Srg-33-like	sensory perception of chemical stimulus, transmembrane signaling receptor activity, membrane, integral component of membrane	NA	NA	SPAL_0001029300	62.6374	SVE_0495300	31.044	NA	NA
Up in iL3	SSTP_0000564300	1.13265	2.02748	2.1651	-1.49846	-1.18788	-1.79889	2.03, IQR = 1.58 to 2.1	-1.5, IQR = -1.65 to -1.34	3.24433	9.75252e-07	7.55872	A0A0K0E813	NA	7TM_GPCR_serpentine_rcpt_Str	membrane, integral component of membrane	SRAE_1000292700	32.6027	SPAL_0000937875	37.8082	SVE_0037600	24.9315	NA	NA
Up in iL3	SSTP_0000020000	0.681081	0.68302	1.35338	-1.81593	-2.27093	-2.55981	0.68, IQR = 0.68 to 1.02	-2.27, IQR = -2.42 to -2.04	3.09405	1.77896e-06	6.90201	A0A0K0DSI8	Serpentine receptor class gamma	7TM_GPCR_serpentine_rcpt_Srg	sensory perception of chemical stimulus, transmembrane signaling receptor activity, membrane, integral component of membrane	SRAE_1000236400	73.3068	SPAL_0000368200	62.9482	NA	NA	NA	NA
Up in iL3	SSTP_0001182400	0.271504	1.10941	0.851178	-1.61817	-2.63151	-2.56083	0.85, IQR = 0.56 to 0.98	-2.56, IQR = -2.6 to -2.09	2.99182	8.24686e-06	5.13032	A0A0K0EQU3	NA	GPCR_Rhodpsn_7TM, 7TM_GPCR_serpentine_rcpt_Srx	integral component of membrane, membrane	SRAE_1000256800	77.7027	SPAL_0000865400	66.8919	SVE_1042900	66.5541	srx-47	17.5676
Up in iL3	SSTP_0001115900	0.422742	1.87416	1.98078	-1.61768	-1.04557	-1.46999	1.87, IQR = 1.15 to 1.93	-1.47, IQR = -1.54 to -1.26	2.76687	1.24337e-05	4.55827	A0A0K0ENX2	NA	GPCR_Rhodpsn_7TM, 7TM_GPCR_Srsx	integral component of membrane, membrane	SRAE_2000450100	48.4472	SPAL_0000411600	19.5652	NA	NA	NA	NA
Up in iL3	SSTP_0000697000	5.6913	5.94111	6.38069	3.38587	3.22857	3.24799	5.94, IQR = 5.82 to 6.16	3.25, IQR = 3.24 to 3.32	2.70757	6.14694e-11	19.3583	A0A0K0EBV0	NA	NA	membrane, integral component of membrane	SRAE_2000389700	87.4439	SPAL_0000874100	82.7354	SVE_0731300	84.7534	NA	NA
Up in iL3	SSTP_0000425800	3.68275	4.76634	4.69515	1.76178	1.82074	1.81833	4.7, IQR = 4.19 to 4.73	1.82, IQR = 1.79 to 1.82	2.56442	2.54534e-08	11.6777	A0A0K0E440	NA	GPCR_Rhodpsn, GPCR_Rhodpsn_7TM	G protein-coupled receptor signaling pathway, G protein-coupled receptor activity, integral component of membrane, membrane	SRAE_2000446700	86.4721	NA	NA	SVE_0340900	81.4324	NA	NA
Up in iL3	SSTP_0001115800	-1.378	-0.132185	-0.597563	-2.92466	-3.56413	-2.99693	-0.6, IQR = -0.99 to -0.36	-3, IQR = -3.28 to -2.96	2.44034	0.000234828	1.43944	A0A0K0ENX1	NA	7TM_GPCR_serpentine_rcpt_Sre	sensory perception of chemical stimulus, integral component of membrane, membrane	SRAE_2000450200	28.2392	SPAL_0000411500	46.8439	SVE_1569200	46.5116	NA	NA
Up in iL3	SSTP_0000382000	-0.507025	0.334541	0.260028	-2.31362	-2.6302	-2.12928	0.26, IQR = -0.12 to 0.3	-2.31, IQR = -2.47 to -2.22	2.36616	5.37497e-06	5.64346	A0A0K0E2V1	NA	GPCR_Rhodpsn_7TM, 7TM_GPCR_serpentine_rcpt_Srv, Srg-33-like	sensory perception of chemical stimulus, transmembrane signaling receptor activity, integral component of membrane, membrane	SRAE_2000482800	47.6974	SPAL_0000062700	30.9211	SVE_0238100	31.5789	NA	NA
Up in iL3	SSTP_0000993200	3.34598	4.03696	3.50654	1.34828	1.26101	1.44064	3.51, IQR = 3.43 to 3.77	1.35, IQR = 1.3 to 1.39	2.27916	1.91127e-08	12.1074	A0A0K0EKD8	NA	GPCR_Rhodpsn_7TM	integral component of membrane, membrane	SRAE_1000101200	83.6852	SPAL_0000244000	76.5835	SVE_0001600	76.5835	T11F9.1	33.5893
Up in iL3	SSTP_0001196800	1.91138	1.98653	2.56709	-0.208925	-0.0433795	-0.0902674	1.99, IQR = 1.95 to 2.28	-0.09, IQR = -0.15 to -0.07	2.24993	6.70587e-08	10.6806	A0A0K0ER83	NA	7TM_GPCR_serpentine_rcpt_Srd	membrane, integral component of membrane	SRAE_1000223600	62.9412	SPAL_0001395500	47.0588	SVE_1826000	42.3529	NA	NA
Up in iL3	SSTP_0000554600	0.240778	0.578202	0.2592	-2.21768	-1.73686	-1.59272	0.26, IQR = 0.25 to 0.42	-1.74, IQR = -1.98 to -1.66	2.21488	5.61346e-06	5.56063	A0A0K0E7S1	NA	NA	membrane, integral component of membrane	SRAE_1000280000	72.0721	SPAL_0001687000	63.6637	SVE_0863000	59.1592	NA	NA
Up in iL3	SSTP_0000958500	0.68365	1.78016	1.67705	-0.832124	-0.682763	-1.06196	1.68, IQR = 1.18 to 1.73	-0.83, IQR = -0.95 to -0.76	2.21487	0.000232094	1.15853	A0A0K0EJD9	NA	7TM_GPCR_serpentine_rcpt_Srt	membrane, integral component of membrane	SRAE_0000002700	58.6207	SPAL_0001751500	54.8589	SVE_1105400	58.6207	srt-44	28.8401
Up in iL3	SSTP_0000443050	2.09851	2.79944	2.74474	0.261869	0.490862	0.300704	2.74, IQR = 2.42 to 2.77	0.3, IQR = 0.28 to 0.4	2.18353	1.27278e-05	4.30034	A0A0K0E4L1	NA	7TM_GPCR_serpentine_rcpt_Srt	membrane, integral component of membrane	SRAE_X000197650	63.0769	NA	NA	NA	NA	srt-43	21.9231
Up in iL3	SSTP_0001111100	-0.305668	-0.328571	-0.078374	-2.64897	-2.16613	-2.32854	-0.31, IQR = -0.32 to -0.19	-2.33, IQR = -2.49 to -2.25	2.14075	2.59963e-05	3.84219	A0A0K0ENS4	NA	GPCR_Rhodpsn_7TM, 7TM_GPCR_serpentine_rcpt_Srx	integral component of membrane, membrane	SRAE_2000476900	56.5693	SPAL_0001229232	55.1095	SVE_1000654750	63.5037	NA	NA
Up in iL3	SSTP_0000113900	1.27386	1.19763	1.63518	-0.631547	-0.492968	-0.767768	1.27, IQR = 1.24 to 1.45	-0.63, IQR = -0.7 to -0.56	1.98797	7.59793e-06	5.08167	A0A0K0DV71	NA	NA	membrane, integral component of membrane	SRAE_2000471650	78.8732	NA	NA	SVE_0341200	64.7887	NA	NA
Up in iL3	SSTP_0000363000	2.756	3.25524	3.39015	1.23286	1.24855	1.22371	3.26, IQR = 3.01 to 3.32	1.23, IQR = 1.23 to 1.24	1.88393	1.06624e-08	12.8867	A0A0K0E2A8	NA	GPCR_Rhodpsn, 7TM_GPCR_Srsx	G protein-coupled receptor signaling pathway, G protein-coupled receptor activity, integral component of membrane, membrane	SRAE_2000474200	89.0282	SPAL_0001079400	81.5047	SVE_1655800	81.1912	NA	NA
Up in iL3	SSTP_0000415000	2.87577	3.42461	3.04149	1.23292	1.3127	1.18665	3.04, IQR = 2.96 to 3.23	1.23, IQR = 1.21 to 1.27	1.86946	2.01686e-08	12.0714	A0A0K0E3T0	NA	7TM_GPCR_serpentine_rcpt_Str	membrane, integral component of membrane	NA	NA	SPAL_0000464500	71.9512	NA	NA	str-182	14.3293
Up in iL3	SSTP_0000381900	2.00782	2.70187	2.64818	0.833402	0.866082	0.430872	2.65, IQR = 2.33 to 2.68	0.83, IQR = 0.63 to 0.85	1.72691	3.55001e-06	5.79574	A0A0K0E2V0	NA	7TM_GPCR_serpentine_rcpt_Sre	sensory perception of chemical stimulus, integral component of membrane, membrane	SRAE_2000482900	81.7629	SPAL_0000606300	65.6535	SVE_1566000	66.8693	NA	NA
Up in iL3	SSTP_0000937700	-0.744349	-0.132417	-0.449568	-1.88737	-2.06961	-2.56091	-0.45, IQR = -0.6 to -0.29	-2.07, IQR = -2.32 to -1.98	1.72361	0.000456162	0.62781	A0A0K0EIS1	NA	7TM_GPCR_serpentine_rcpt_Sre	sensory perception of chemical stimulus, integral component of membrane, membrane	SRAE_2000494100	50.6711	SPAL_0001434200	35.5705	SVE_0337000	40.9396	NA	NA
Up in iL3	SSTP_0000356800	0.683939	0.989737	1.08824	-0.571805	-1.24095	-0.608417	0.99, IQR = 0.84 to 1.04	-0.61, IQR = -0.92 to -0.59	1.70969	3.64306e-05	3.30119	A0A0K0E247	NA	7TM_GPCR_serpentine_rcpt_Sri	membrane, integral component of membrane	SRAE_2000169600	55.5901	NA	NA	SVE_1996600	20.4969	NA	NA
Up in iL3	SSTP_0000425400	1.13079	2.19925	2.5927	0.105039	0.0532047	0.526641	2.2, IQR = 1.67 to 2.4	0.11, IQR = 0.08 to 0.32	1.70506	0.000180536	1.28743	A0A0K0E435	Serpentine receptor class gamma	7TM_GPCR_serpentine_rcpt_Srg	sensory perception of chemical stimulus, transmembrane signaling receptor activity, membrane, integral component of membrane	NA	NA	NA	NA	NA	NA	NA	NA
Up in iL3	SSTP_0001059800	3.22706	3.63213	3.51185	1.73807	1.88256	1.70541	3.51, IQR = 3.37 to 3.57	1.74, IQR = 1.72 to 1.81	1.67764	1.93857e-06	6.35475	A0A0K0EMB0	NA	GPCR_Rhodpsn_7TM	integral component of membrane, membrane	SRAE_X000186100	86.2595	SPAL_0001467100	82.9517	SVE_0819600	47.0738	Y37E11AL.1	40.7125
Up in iL3	SSTP_0000207250	0.925011	0.000409147	0.122625	-1.24147	-1.09108	-1.53141	0.12, IQR = 0.06 to 0.52	-1.24, IQR = -1.39 to -1.17	1.65812	0.00206846	-1.16339	A0A0K0DXV8	NA	GPCR_Rhodpsn_7TM, 7TM_GPCR_serpentine_rcpt_Srd	integral component of membrane, membrane	SRAE_2000412500	16.5803	SPAL_0001736700	29.7927	NA	NA	NA	NA
Up in iL3	SSTP_0001016700	1.6156	1.20321	0.934742	-0.277739	-0.79491	-0.072812	1.2, IQR = 1.07 to 1.41	-0.28, IQR = -0.54 to -0.18	1.6482	1.76588e-05	4.07529	A0A0K0EL23	NA	NA	membrane, integral component of membrane	SRAE_2000432400	64.3836	SPAL_0001382700	61.9863	SVE_0272200	50.6849	NA	NA
Up in iL3	SSTP_0001168000	-1.28197	-0.554985	-1.72013	-2.78054	-2.63131	-2.99759	-1.28, IQR = -1.5 to -0.92	-2.78, IQR = -2.89 to -2.71	1.63425	0.0051438	-1.92245	A0A0K0EQF1	NA	7TM_GPCR_serpentine_rcpt_Srv	membrane, integral component of membrane	SRAE_1000020200	58.147	SPAL_0001545000	65.8147	SVE_0338500	58.7859	NA	NA
Up in iL3	SSTP_0000247200	1.78198	1.84021	1.52399	0.194529	0.0968681	-0.00783876	1.78, IQR = 1.65 to 1.81	0.1, IQR = 0.04 to 0.15	1.62878	9.4417e-05	2.06764	A0A0K0DZ05	NA	7TM_GPCR_serpentine_rcpt_Srd	membrane, integral component of membrane	SRAE_X000025200	41.2979	SPAL_0001774800	25.0737	SVE_0113600	54.8673	NA	NA
Up in iL3	SSTP_0001065400	-0.949065	-0.274961	-0.13351	-2.31323	-1.89263	-2.03909	-0.27, IQR = -0.61 to -0.2	-2.04, IQR = -2.18 to -1.97	1.61328	0.00709462	-2.36462	A0A0K0EMG5	NA	7TM_GPCR_serpentine_rcpt_Srx	membrane, integral component of membrane	NA	NA	NA	NA	SVE_0366100	54.7468	NA	NA
Up in iL3	SSTP_0000686100	0.272078	1.23961	1.72445	-0.664621	-0.336708	-0.455079	1.24, IQR = 0.76 to 1.48	-0.46, IQR = -0.56 to -0.4	1.52535	0.000514409	0.240583	A0A0K0EBI9	NA	7TM_GPCR_serpentine_rcpt_Srx	membrane, integral component of membrane	SRAE_2000514400	56.9579	SPAL_0000982400	52.1036	SVE_1573100	42.3948	NA	NA
Up in iL3	SSTP_0000607500	-0.0857237	0.0409005	0.668609	-1.49984	-1.531	-0.976172	0.04, IQR = -0.02 to 0.35	-1.5, IQR = -1.52 to -1.24	1.52048	0.00233672	-1.28421	A0A0K0E991	NA	7TM_GPCR_serpentine_rcpt_Srx	membrane, integral component of membrane	NA	NA	SPAL_0001210700	38.5093	SVE_0642600	32.2981	NA	NA
Up in iL3	SSTP_0001111200	-0.16926	-0.616918	-0.948602	-1.61745	-2.26798	-2.22607	-0.62, IQR = -0.78 to -0.39	-2.23, IQR = -2.25 to -1.92	1.47251	0.00357427	-1.62354	A0A0K0ENS5	NA	GPCR_Rhodpsn_7TM, 7TM_GPCR_serpentine_rcpt_Srx	integral component of membrane, membrane	NA	NA	SPAL_0001229216	40.5844	SVE_2022700	36.039	NA	NA
Up in iL3	SSTP_0000697300	4.61177	5.00972	5.10921	3.77646	3.43925	3.60538	5.01, IQR = 4.81 to 5.06	3.61, IQR = 3.52 to 3.69	1.29299	4.80077e-07	7.84453	A0A0K0EBV3	NA	Globin/Proto	oxygen binding, heme binding, membrane, integral component of membrane	SRAE_2000389400	91.1223	SPAL_0000873900	82.2446	SVE_0731600	84.5896	glb-33	31.1558
Up in iL3	SSTP_0000872100	2.94727	3.41707	3.67852	2.06867	2.18955	1.87205	3.42, IQR = 3.18 to 3.55	2.07, IQR = 1.97 to 2.13	1.2875	7.6849e-05	1.98556	A0A0K0EGW1	NA	NA	membrane, integral component of membrane	SRAE_X000010100	95.3216	SPAL_0000526900	91.8129	SVE_0623400	90.9357	NA	NA
Up in iL3	SSTP_0000166700	0.140459	-0.553361	0.907775	-0.632317	-0.955795	-1.87473	0.14, IQR = -0.21 to 0.52	-0.96, IQR = -1.42 to -0.79	1.28527	0.0128535	-3.12832	A0A0K0DWQ0	NA	7TM_GPCR_serpentine_rcpt_Str	membrane, integral component of membrane	SRAE_0000000250	65.0602	SPAL_0000619700	44.5783	SVE_1102400	19.8795	NA	NA
Up in iL3	SSTP_0001016200	1.40321	1.7157	1.94285	0.51794	0.376473	0.391111	1.72, IQR = 1.56 to 1.83	0.39, IQR = 0.38 to 0.45	1.24122	0.000246928	0.93029	A0A0K0EL18	NA	NA	membrane, integral component of membrane	NA	NA	NA	NA	NA	NA	NA	NA
Up in iL3	SSTP_0001185400	3.27545	3.90788	3.87685	2.51648	2.48066	2.37971	3.88, IQR = 3.58 to 3.89	2.48, IQR = 2.43 to 2.5	1.21529	3.92134e-06	5.43583	A0A0K0EQX3	NA	GPCR_Rhodpsn_7TM	integral component of membrane, membrane	SRAE_1000259700	83.5821	SPAL_0000172100	77.6119	NA	NA	NA	NA
Up in iL3	SSTP_0000431100	3.47919	3.60611	3.15428	2.016	2.31788	2.34153	3.48, IQR = 3.32 to 3.54	2.32, IQR = 2.17 to 2.33	1.20074	1.90037e-06	6.34454	A0A0K0E492	NA	GPCR_Rhodpsn, GPCR_Rhodpsn_7TM	G protein-coupled receptor signaling pathway, G protein-coupled receptor activity, integral component of membrane, membrane	SRAE_X000170800	77.3512	SPAL_0000358300	72.3608	SVE_0664200	69.0979	NA	NA
Up in iL3	SSTP_0000346000	5.6919	5.23809	5.64086	4.38132	4.29261	4.30786	5.64, IQR = 5.44 to 5.67	4.31, IQR = 4.3 to 4.34	1.19488	4.20222e-07	7.94089	A0A0K0E1U1	Serpentine receptor class gamma	7TM_GPCR_serpentine_rcpt_Srg	sensory perception of chemical stimulus, transmembrane signaling receptor activity, membrane, integral component of membrane	SRAE_1000032000	78.4	SPAL_0000389200	73.6	SVE_1157700	77.6	NA	NA
Up in iL3	SSTP_0000964100	7.0681	7.4944	7.16413	6.09913	6.06436	6.12907	7.16, IQR = 7.12 to 7.33	6.1, IQR = 6.08 to 6.11	1.14477	2.28857e-07	8.59923	A0A0K0EJJ5	NA	GPCR_Rhodpsn, GPCR_Rhodpsn_7TM, 7TM_GPCR_serpentine_rcpt_Srw	G protein-coupled peptide receptor activity, G protein-coupled receptor signaling pathway, G protein-coupled receptor activity, integral component of membrane, membrane	SRAE_2000425500	91.9626	SPAL_0000136500	87.2897	SVE_0655900	87.2897	dmsr-1	44.2991
Up in iL3	SSTP_0000442300	3.49527	3.98386	3.99787	2.74558	2.72193	2.61981	3.98, IQR = 3.74 to 3.99	2.72, IQR = 2.67 to 2.73	1.11957	1.27735e-05	3.98911	A0A0K0E4K3	NA	GPCR_Rhodpsn, GPCR_Rhodpsn_7TM, 7TM_GPCR_serpentine_rcpt_Srx	G protein-coupled receptor signaling pathway, G protein-coupled receptor activity, integral component of membrane, membrane	SRAE_X000198500	92.4812	SPAL_0000671400	86.2155	SVE_0112700	85.7143	npr-19	55.6391
Up in iL3	SSTP_0000423100	0.797885	0.94634	1.18189	0.103879	-0.423106	-0.141782	0.95, IQR = 0.87 to 1.06	-0.14, IQR = -0.28 to -0.02	1.11136	0.00720691	-2.68322	A0A0K0E414	NA	GPCR_Rhodpsn, GPCR_Rhodpsn_7TM, 7TM_GPCR_serpentine_rcpt_Srv, Srg-33-like	G protein-coupled receptor signaling pathway, G protein-coupled receptor activity, sensory perception of chemical stimulus, transmembrane signaling receptor activity, integral component of membrane, membrane	NA	NA	NA	NA	SVE_1568900	50	NA	NA
Up in iL3	SSTP_0000479900	5.11669	5.05997	5.12674	4.02434	4.10094	4.1041	5.12, IQR = 5.09 to 5.12	4.1, IQR = 4.06 to 4.1	1.02468	7.07636e-08	10.1761	A0A0K0E5L3	NA	GPCR_Rhodpsn_7TM	integral component of membrane, membrane	SRAE_2000421000	57.7259	SPAL_0000141100	52.7697	SVE_0883800	53.0612	C47E8.3	21.137
Up in iL3	SSTP_0000209200	0.941496	0.656267	1.3135	0.0840112	0.0921133	-0.340585	0.94, IQR = 0.8 to 1.13	0.08, IQR = -0.13 to 0.09	1.00988	0.00100738	-0.537506	A0A0K0DXX8	Serpentine receptor class gamma	7TM_GPCR_serpentine_rcpt_Srg	sensory perception of chemical stimulus, transmembrane signaling receptor activity, membrane, integral component of membrane	SRAE_2000414400	69.7368	NA	NA	SVE_2022200	42.9825	NA	NA
Up in iL3	SSTP_0001250400	4.05255	4.00004	4.35552	3.17598	3.2141	3.02887	4.05, IQR = 4.03 to 4.2	3.18, IQR = 3.1 to 3.2	0.988894	3.0404e-05	2.91351	A0A0K0ESS4	NA	GPCR_Rhodpsn_7TM	integral component of membrane, membrane	SRAE_X000114200	94.4573	SPAL_0000696000	86.836	SVE_0624200	86.836	ZK1307.7	44.1109
Up in iL3	SSTP_0000956800	2.78265	3.84805	3.93012	2.71432	2.33928	2.4732	3.85, IQR = 3.32 to 3.89	2.47, IQR = 2.41 to 2.59	0.98345	0.00151171	-1.46431	A0A0K0EJC2	NA	7TM_GPCR_serpentine_rcpt_Srt	membrane, integral component of membrane	NA	NA	SPAL_0001749300	59.8485	SVE_1103100	59.4697	srt-43	26.8939
Up in iL3	SSTP_0000860100	2.27621	2.33817	2.42656	1.28304	1.54311	1.54838	2.34, IQR = 2.31 to 2.38	1.54, IQR = 1.41 to 1.55	0.887136	0.0122162	-3.55146	A0A0K0EGI9	NA	7TM_GPCR_serpentine_rcpt_Srv	membrane, integral component of membrane	SRAE_X000039900	44.0252	NA	NA	NA	NA	NA	NA
Up in iL3	SSTP_0000959400	2.11751	2.28757	2.26447	1.38609	1.40736	1.32911	2.26, IQR = 2.19 to 2.28	1.39, IQR = 1.36 to 1.4	0.845581	0.000152349	1.34543	A0A0K0EJE8	NA	GPCR_Rhodpsn_7TM, 7TM_GPCR_serpentine_rcpt_Srx	integral component of membrane, membrane	SRAE_0000012400	70.2875	SPAL_0000022600	61.9808	SVE_0900100	57.1885	srx-46	19.1693
Up in iL3	SSTP_0001007400	0.609891	0.157795	-0.134617	-0.430851	-0.336535	-0.744709	0.16, IQR = 0.01 to 0.38	-0.43, IQR = -0.59 to -0.38	0.736467	0.0408116	-4.39709	A0A0K0EKT3	NA	GPCR_Rhodpsn, GPCR_Rhodpsn_7TM, 7TM_GPCR_Srsx	G protein-coupled receptor signaling pathway, G protein-coupled receptor activity, integral component of membrane, membrane	SRAE_2000105700	77.4603	NA	NA	SVE_0515000	70.7936	srsx-25	39.3651
Up in iL3	SSTP_0001173300	2.81137	2.66233	2.6151	2.05398	1.86244	2.00042	2.66, IQR = 2.64 to 2.74	2, IQR = 1.93 to 2.03	0.727261	0.000786206	-0.61616	NA	NA	NA	NA	SRAE_0000033100	72.6384	SPAL_0001592300	71.3355	SVE_0997500	75.57	H09F14.1	33.2248
Up in iL3	SSTP_0000287100	1.74869	2.79637	2.34691	1.65796	1.62632	1.47254	2.35, IQR = 2.05 to 2.57	1.63, IQR = 1.55 to 1.64	0.699539	0.00431337	-2.42984	A0A0K0E055	NA	GPCR_Rhodpsn, GPCR_Rhodpsn_7TM	G protein-coupled receptor signaling pathway, G protein-coupled receptor activity, integral component of membrane, membrane	SRAE_1000159300	90.099	SPAL_0000795200	85.1485	SVE_1056900	79.2079	F32D8.10	37.1287
Up in iL3	SSTP_0001161000	4.29338	4.23701	4.53664	3.62397	3.80155	3.54867	4.29, IQR = 4.27 to 4.42	3.62, IQR = 3.59 to 3.71	0.692741	8.6864e-06	4.35719	A0A0K0EQ81	NA	GPCR_Rhodpsn, GPCR_Rhodpsn_7TM, 7TM_GPCR_serpentine_rcpt_Srw	G protein-coupled peptide receptor activity, G protein-coupled receptor signaling pathway, G protein-coupled receptor activity, integral component of membrane, membrane	SRAE_1000078900	75.492	SPAL_0000736000	71.1986	SVE_1029300	72.6297	dmsr-8	29.1592
Up in iL3	SSTP_0000836800	1.93034	2.35566	2.85463	1.57314	1.88821	1.72562	2.36, IQR = 2.14 to 2.61	1.73, IQR = 1.65 to 1.81	0.627602	0.0500197	-5.05418	A0A0K0EFW1	NA	7TM_GPCR_serpentine_rcpt_Srt	membrane, integral component of membrane	SRAE_1000322800	47.0588	SPAL_0001660500	38.0952	SVE_1947200	37.2549	NA	NA
Up in iL3	SSTP_0001086200	1.80343	1.95184	2.51933	1.44611	1.46497	1.48897	1.95, IQR = 1.88 to 2.24	1.46, IQR = 1.46 to 1.48	0.602388	0.0168081	-3.8646	A0A0K0EN24	NA	7TM_GPCR_serpentine_rcpt_Srv	membrane, integral component of membrane	SRAE_1000111700	80.6854	SPAL_0000276400	73.2087	SVE_0085400	67.6012	NA	NA
Up in iL3	SSTP_0001190900	4.30874	4.56429	4.65641	3.89242	3.97831	3.93029	4.56, IQR = 4.44 to 4.61	3.93, IQR = 3.91 to 3.95	0.570258	0.00058668	-0.578448	A0A0K0ER27	NA	7TM_GPCR_serpentine_rcpt_Srv	membrane, integral component of membrane	SRAE_1000075200	94.5312	SPAL_0000744100	94.9219	SVE_1021000	94.5312	NA	NA
Up in iL3	SSTP_0000941900	1.8254	0.946637	1.48743	1.00273	0.65689	1.03924	1.49, IQR = 1.22 to 1.66	1, IQR = 0.83 to 1.02	0.521706	0.0371598	-4.56948	A0A0K0EIW3	NA	7TM_GPCR_serpentine_rcpt_Srv	membrane, integral component of membrane	SRAE_2000512000	71.6867	SPAL_0000410300	65.9639	SVE_1570600	43.0723	NA	NA

## Sheet: iL3 vs PF
File S6. S. stercoralis chemoreceptor differential gene expression results table: iL3s vs all other life stages
An example .xlsx results file generated by the Strongyloides RNA-seq Browser containing a differential gene expression table listing 64 S. stercoralis chemoreceptors that are consistently upregulated in iL3s versus all other life stages.
S. stercoralis RNA-seq Differential Gene Expression
Contrast: iL3-PF
Report generated on March 13, 2021
Columns labeled with <life stage - sample ID> report log2 counts per million (CPM) expression. Columns labeled avg_<life stage> are median log2CPM with IQR. The column labeled logFC reports log2 fold change.
P-values corrected across the following multiple pairwise comparisons: iL3-FLF; iL3-iL3a; iL3-PF; iL3-pfL1; iL3-ppL1; iL3-ppL3
Lists include genes that are differentially regulated in the following directions (relative to the target life stage): Up; Down; NotSig
Percentage of genes for each differential expression pattern: 100
Lists only include genes with matching differential expression descriptions across the following pairwise comparisons: iL3-FLF; iL3-iL3a; iL3-PF; iL3-pfL1; iL3-ppL1; iL3-ppL3
DEG_Desc	geneID	iL3-ERR146947	iL3-ERR146948	iL3-ERR146949	PF-ERR146959	PF-ERR146960	PF-ERR146961	avg_(iL3)	avg_(PF)	logFC	BH.adj.P.Val	LogOdds	UniProtKB	Description	InterPro	GO_term	In.subclade_geneID	In.subclade_percent_homology	Out.subclade_geneID	Out.subclade_percent_homology	Out2.subclade_geneID	Out2.subclade_percent_homology	Ce_geneID	Ce_percent_homology
Up in iL3	SSTP_0000554700	1.879	1.69275	2.19971	-4.75386	-6.42301	-6.48331	1.88, IQR = 1.79 to 2.04	-6.42, IQR = -6.45 to -5.59	7.79838	1.49804e-09	12.7791	A0A0K0E7S2	NA	NA	membrane, integral component of membrane	SRAE_1000279900	60.0649	SPAL_0000683400	55.5195	SVE_0863100	66.8831	NA	NA
Up in iL3	SSTP_0000425400	1.13079	2.19925	2.5927	-4.75386	-4.83774	-6.48331	2.2, IQR = 1.67 to 2.4	-4.84, IQR = -5.66 to -4.8	7.30384	3.78479e-08	9.71145	A0A0K0E435	Serpentine receptor class gamma	7TM_GPCR_serpentine_rcpt_Srg	sensory perception of chemical stimulus, transmembrane signaling receptor activity, membrane, integral component of membrane	NA	NA	NA	NA	NA	NA	NA	NA
Up in iL3	SSTP_0000836800	1.93034	2.35566	2.85463	-3.1687	-4.83747	-6.48331	2.36, IQR = 2.14 to 2.61	-4.84, IQR = -5.66 to -4	7.2815	2.80619e-08	10.061	A0A0K0EFW1	NA	7TM_GPCR_serpentine_rcpt_Srt	membrane, integral component of membrane	SRAE_1000322800	47.0588	SPAL_0001660500	38.0952	SVE_1947200	37.2549	NA	NA
Up in iL3	SSTP_0000958500	0.68365	1.78016	1.67705	-4.75386	-6.42301	-6.48331	1.68, IQR = 1.18 to 1.73	-6.42, IQR = -6.45 to -5.59	7.24153	2.15965e-07	7.98402	A0A0K0EJD9	NA	7TM_GPCR_serpentine_rcpt_Srt	membrane, integral component of membrane	SRAE_0000002700	58.6207	SPAL_0001751500	54.8589	SVE_1105400	58.6207	srt-44	28.8401
Up in iL3	SSTP_0000425000	1.09557	0.810176	1.41181	-4.75386	-6.42301	-6.48331	1.1, IQR = 0.95 to 1.25	-6.42, IQR = -6.45 to -5.59	6.9796	2.64594e-08	10.0206	A0A0K0E431	Serpentine receptor class gamma	7TM_GPCR_serpentine_rcpt_Srg	sensory perception of chemical stimulus, transmembrane signaling receptor activity, membrane, integral component of membrane	SRAE_2000446900	35.119	SPAL_0000084400	48.5119	NA	NA	NA	NA
Up in iL3	SSTP_0000113900	1.27386	1.19763	1.63518	-4.75386	-4.83958	-6.48331	1.27, IQR = 1.24 to 1.45	-4.84, IQR = -5.66 to -4.8	6.72717	1.93053e-09	12.5427	A0A0K0DV71	NA	NA	membrane, integral component of membrane	SRAE_2000471650	78.8732	NA	NA	SVE_0341200	64.7887	NA	NA
Up in iL3	SSTP_0000346000	5.6919	5.23809	5.64086	-1.28813	-1.30335	-0.973491	5.64, IQR = 5.44 to 5.67	-1.29, IQR = -1.3 to -1.13	6.69314	1.98409e-12	20.7077	A0A0K0E1U1	Serpentine receptor class gamma	7TM_GPCR_serpentine_rcpt_Srg	sensory perception of chemical stimulus, transmembrane signaling receptor activity, membrane, integral component of membrane	SRAE_1000032000	78.4	SPAL_0000389200	73.6	SVE_1157700	77.6	NA	NA
Up in iL3	SSTP_0001106100	0.647601	0.821824	0.936833	-4.75386	-6.42301	-6.48331	0.82, IQR = 0.73 to 0.88	-6.42, IQR = -6.45 to -5.59	6.68026	2.79072e-10	14.249	A0A0K0ENM4	NA	7TM_GPCR_serpentine_rcpt_Srv	membrane, integral component of membrane	SRAE_1000020300	25.5172	NA	NA	NA	NA	NA	NA
Up in iL3	SSTP_0000425800	3.68275	4.76634	4.69515	-2.43208	-2.02995	-2.23651	4.7, IQR = 4.19 to 4.73	-2.24, IQR = -2.33 to -2.13	6.5672	7.76123e-10	14.0324	A0A0K0E440	NA	GPCR_Rhodpsn, GPCR_Rhodpsn_7TM	G protein-coupled receptor signaling pathway, G protein-coupled receptor activity, integral component of membrane, membrane	SRAE_2000446700	86.4721	NA	NA	SVE_0340900	81.4324	NA	NA
Up in iL3	SSTP_0000385000	0.964404	0.334184	0.568923	-4.75386	-6.42301	-6.48331	0.57, IQR = 0.45 to 0.77	-6.42, IQR = -6.45 to -5.59	6.51796	1.67784e-07	8.21496	A0A0K0E2Y1	NA	7TM_GPCR_serpentine_rcpt_Sre	sensory perception of chemical stimulus, integral component of membrane, membrane	SRAE_2000498600	74.4108	NA	NA	NA	NA	NA	NA
Up in iL3	SSTP_0000537400	0.883331	1.67875	1.77146	-3.1679	-4.83797	-6.48331	1.68, IQR = 1.28 to 1.73	-4.84, IQR = -5.66 to -4	6.3482	1.20829e-08	10.8612	A0A0K0E798	NA	7TM_GPCR_serpentine_rcpt_Srd	membrane, integral component of membrane	SRAE_2000459500	55.0523	SPAL_0000036900	14.9826	SVE_0266000	43.554	NA	NA
Up in iL3	SSTP_0000356800	0.683939	0.989737	1.08824	-4.75386	-4.83764	-6.48331	0.99, IQR = 0.84 to 1.04	-4.84, IQR = -5.66 to -4.8	6.27962	2.27581e-09	12.3607	A0A0K0E247	NA	7TM_GPCR_serpentine_rcpt_Sri	membrane, integral component of membrane	SRAE_2000169600	55.5901	NA	NA	SVE_1996600	20.4969	NA	NA
Up in iL3	SSTP_0000554600	0.240778	0.578202	0.2592	-4.75386	-6.42301	-6.48331	0.26, IQR = 0.25 to 0.42	-6.42, IQR = -6.45 to -5.59	6.24791	1.21996e-09	12.8764	A0A0K0E7S1	NA	NA	membrane, integral component of membrane	SRAE_1000280000	72.0721	SPAL_0001687000	63.6637	SVE_0863000	59.1592	NA	NA
Up in iL3	SSTP_0000543000	0.659146	1.55632	2.16386	-4.75386	-6.42301	-3.31403	1.56, IQR = 1.11 to 1.86	-4.75, IQR = -5.59 to -4.03	6.24152	3.36568e-06	5.27261	A0A0K0E7F3	NA	7TM_GPCR_serpentine_rcpt_Str	membrane, integral component of membrane	SRAE_1000230900	55.6548	SPAL_0000380400	50	SVE_1276100	48.2143	NA	NA
Up in iL3	SSTP_0001016200	1.40321	1.7157	1.94285	-4.75386	-4.8438	-4.14678	1.72, IQR = 1.56 to 1.83	-4.75, IQR = -4.8 to -4.45	6.23764	2.92421e-09	12.2789	A0A0K0EL18	NA	NA	membrane, integral component of membrane	NA	NA	NA	NA	NA	NA	NA	NA
Up in iL3	SSTP_0000247200	1.78198	1.84021	1.52399	-2.43154	-3.61509	-6.48331	1.78, IQR = 1.65 to 1.81	-3.62, IQR = -5.05 to -3.02	6.09958	1.56971e-08	10.6842	A0A0K0DZ05	NA	7TM_GPCR_serpentine_rcpt_Srd	membrane, integral component of membrane	SRAE_X000025200	41.2979	SPAL_0001774800	25.0737	SVE_0113600	54.8673	NA	NA
Up in iL3	SSTP_0000442300	3.49527	3.98386	3.99787	-1.94681	-3.25219	-1.53065	3.98, IQR = 3.74 to 3.99	-1.95, IQR = -2.6 to -1.74	6.09789	8.04057e-11	16.4055	A0A0K0E4K3	NA	GPCR_Rhodpsn, GPCR_Rhodpsn_7TM, 7TM_GPCR_serpentine_rcpt_Srx	G protein-coupled receptor signaling pathway, G protein-coupled receptor activity, integral component of membrane, membrane	SRAE_X000198500	92.4812	SPAL_0000671400	86.2155	SVE_0112700	85.7143	npr-19	55.6391
Up in iL3	SSTP_0000697000	5.6913	5.94111	6.38069	-0.110621	-0.271878	0.114345	5.94, IQR = 5.82 to 6.16	-0.11, IQR = -0.19 to 0	6.07979	1.21428e-12	21.5885	A0A0K0EBV0	NA	NA	membrane, integral component of membrane	SRAE_2000389700	87.4439	SPAL_0000874100	82.7354	SVE_0731300	84.7534	NA	NA
Up in iL3	SSTP_0001159500	1.82741	2.02805	2.45359	-4.75386	-3.614	-3.6785	2.03, IQR = 1.93 to 2.24	-3.68, IQR = -4.22 to -3.65	6.00977	2.10576e-09	12.6974	A0A0K0EQ66	NA	GPCR_Rhodpsn, GPCR_Rhodpsn_7TM, 7TM_GPCR_serpentine_rcpt_Srw	G protein-coupled peptide receptor activity, G protein-coupled receptor signaling pathway, G protein-coupled receptor activity, integral component of membrane, membrane	NA	NA	NA	NA	NA	NA	NA	NA
Up in iL3	SSTP_0000872100	2.94727	3.41707	3.67852	-2.43184	-3.25277	-2.09139	3.42, IQR = 3.18 to 3.55	-2.43, IQR = -2.84 to -2.26	5.9419	4.50442e-09	12.1402	A0A0K0EGW1	NA	NA	membrane, integral component of membrane	SRAE_X000010100	95.3216	SPAL_0000526900	91.8129	SVE_0623400	90.9357	NA	NA
Up in iL3	SSTP_0001182400	0.271504	1.10941	0.851178	-3.1686	-6.42301	-4.89788	0.85, IQR = 0.56 to 0.98	-4.9, IQR = -5.66 to -4.03	5.64973	1.51442e-07	8.36044	A0A0K0EQU3	NA	GPCR_Rhodpsn_7TM, 7TM_GPCR_serpentine_rcpt_Srx	integral component of membrane, membrane	SRAE_1000256800	77.7027	SPAL_0000865400	66.8919	SVE_1042900	66.5541	srx-47	17.5676
Up in iL3	SSTP_0001111100	-0.305668	-0.328571	-0.078374	-4.75386	-6.42301	-6.48331	-0.31, IQR = -0.32 to -0.19	-6.42, IQR = -6.45 to -5.59	5.6422	6.88972e-09	11.2242	A0A0K0ENS4	NA	GPCR_Rhodpsn_7TM, 7TM_GPCR_serpentine_rcpt_Srx	integral component of membrane, membrane	SRAE_2000476900	56.5693	SPAL_0001229232	55.1095	SVE_1000654750	63.5037	NA	NA
Up in iL3	SSTP_0000020000	0.681081	0.68302	1.35338	-4.75386	-4.1026	-4.89673	0.68, IQR = 0.68 to 1.02	-4.75, IQR = -4.83 to -4.43	5.45662	5.70316e-08	9.34783	A0A0K0DSI8	Serpentine receptor class gamma	7TM_GPCR_serpentine_rcpt_Srg	sensory perception of chemical stimulus, transmembrane signaling receptor activity, membrane, integral component of membrane	SRAE_1000236400	73.3068	SPAL_0000368200	62.9482	NA	NA	NA	NA
Up in iL3	SSTP_0000937700	-0.744349	-0.132417	-0.449568	-4.75386	-6.42301	-6.48331	-0.45, IQR = -0.6 to -0.29	-6.42, IQR = -6.45 to -5.59	5.43987	3.60197e-08	9.65594	A0A0K0EIS1	NA	7TM_GPCR_serpentine_rcpt_Sre	sensory perception of chemical stimulus, integral component of membrane, membrane	SRAE_2000494100	50.6711	SPAL_0001434200	35.5705	SVE_0337000	40.9396	NA	NA
Up in iL3	SSTP_0000415000	2.87577	3.42461	3.04149	-1.5837	-2.72243	-2.09105	3.04, IQR = 2.96 to 3.23	-2.09, IQR = -2.41 to -1.84	5.32756	1.94539e-11	17.876	A0A0K0E3T0	NA	7TM_GPCR_serpentine_rcpt_Str	membrane, integral component of membrane	NA	NA	SPAL_0000464500	71.9512	NA	NA	str-182	14.3293
Up in iL3	SSTP_0000964100	7.0681	7.4944	7.16413	1.65452	2.1142	1.92709	7.16, IQR = 7.12 to 7.33	1.93, IQR = 1.79 to 2.02	5.29382	5.71665e-14	25.9153	A0A0K0EJJ5	NA	GPCR_Rhodpsn, GPCR_Rhodpsn_7TM, 7TM_GPCR_serpentine_rcpt_Srw	G protein-coupled peptide receptor activity, G protein-coupled receptor signaling pathway, G protein-coupled receptor activity, integral component of membrane, membrane	SRAE_2000425500	91.9626	SPAL_0000136500	87.2897	SVE_0655900	87.2897	dmsr-1	44.2991
Up in iL3	SSTP_0000478400	-0.744306	0.194223	0.300968	-4.75386	-4.83846	-6.48331	0.19, IQR = -0.28 to 0.25	-4.84, IQR = -5.66 to -4.8	5.26162	3.80287e-07	7.40379	A0A0K0E5J8	NA	NA	membrane, integral component of membrane	SRAE_2000422600	55.0955	SPAL_0000260300	32.1656	SVE_0059100	22.9299	NA	NA
Up in iL3	SSTP_0000697300	4.61177	5.00972	5.10921	-0.111178	-0.39846	-0.337217	5.01, IQR = 4.81 to 5.06	-0.34, IQR = -0.37 to -0.22	5.21497	9.3819e-12	19.1148	A0A0K0EBV3	NA	Globin/Proto	oxygen binding, heme binding, membrane, integral component of membrane	SRAE_2000389400	91.1223	SPAL_0000873900	82.2446	SVE_0731600	84.5896	glb-33	31.1558
Up in iL3	SSTP_0001016700	1.6156	1.20321	0.934742	-3.16839	-2.96398	-4.89762	1.2, IQR = 1.07 to 1.41	-3.17, IQR = -4.03 to -3.07	5.02437	4.4246e-09	11.9806	A0A0K0EL23	NA	NA	membrane, integral component of membrane	SRAE_2000432400	64.3836	SPAL_0001382700	61.9863	SVE_0272200	50.6849	NA	NA
Up in iL3	SSTP_0000443050	2.09851	2.79944	2.74474	-1.58257	-3.254	-2.23293	2.74, IQR = 2.42 to 2.77	-2.23, IQR = -2.74 to -1.91	5.00271	1.44354e-07	8.52302	A0A0K0E4L1	NA	7TM_GPCR_serpentine_rcpt_Srt	membrane, integral component of membrane	SRAE_X000197650	63.0769	NA	NA	NA	NA	srt-43	21.9231
Up in iL3	SSTP_0000959400	2.11751	2.28757	2.26447	-2.43157	-2.72265	-3.02353	2.26, IQR = 2.19 to 2.28	-2.72, IQR = -2.87 to -2.58	4.9902	6.76731e-11	16.4109	A0A0K0EJE8	NA	GPCR_Rhodpsn_7TM, 7TM_GPCR_serpentine_rcpt_Srx	integral component of membrane, membrane	SRAE_0000012400	70.2875	SPAL_0000022600	61.9808	SVE_0900100	57.1885	srx-46	19.1693
Up in iL3	SSTP_0001065400	-0.949065	-0.274961	-0.13351	-4.75386	-4.83731	-6.48331	-0.27, IQR = -0.61 to -0.2	-4.84, IQR = -5.66 to -4.8	4.8984	5.39707e-06	4.78447	A0A0K0EMG5	NA	7TM_GPCR_serpentine_rcpt_Srx	membrane, integral component of membrane	NA	NA	NA	NA	SVE_0366100	54.7468	NA	NA
Up in iL3	SSTP_0001161000	4.29338	4.23701	4.53664	-0.667442	-0.398615	-0.464319	4.29, IQR = 4.27 to 4.42	-0.46, IQR = -0.57 to -0.43	4.83265	2.60933e-13	23.2135	A0A0K0EQ81	NA	GPCR_Rhodpsn, GPCR_Rhodpsn_7TM, 7TM_GPCR_serpentine_rcpt_Srw	G protein-coupled peptide receptor activity, G protein-coupled receptor signaling pathway, G protein-coupled receptor activity, integral component of membrane, membrane	SRAE_1000078900	75.492	SPAL_0000736000	71.1986	SVE_1029300	72.6297	dmsr-8	29.1592
Up in iL3	SSTP_0001250400	4.05255	4.00004	4.35552	-0.8475	-0.313199	-0.812948	4.05, IQR = 4.03 to 4.2	-0.81, IQR = -0.83 to -0.56	4.75585	1.0911e-10	16.318	A0A0K0ESS4	NA	GPCR_Rhodpsn_7TM	integral component of membrane, membrane	SRAE_X000114200	94.4573	SPAL_0000696000	86.836	SVE_0624200	86.836	ZK1307.7	44.1109
Up in iL3	SSTP_0000479900	5.11669	5.05997	5.12674	0.530144	0.293723	0.431362	5.12, IQR = 5.09 to 5.12	0.43, IQR = 0.36 to 0.48	4.70333	9.84982e-14	24.8353	A0A0K0E5L3	NA	GPCR_Rhodpsn_7TM	integral component of membrane, membrane	SRAE_2000421000	57.7259	SPAL_0000141100	52.7697	SVE_0883800	53.0612	C47E8.3	21.137
Up in iL3	SSTP_0000370900	-0.35212	0.367691	0.421304	-4.75386	-4.10054	-4.89893	0.37, IQR = 0.01 to 0.39	-4.75, IQR = -4.83 to -4.43	4.69965	3.41977e-07	7.5531	A0A0K0E2J1	NA	7TM_GPCR_serpentine_rcpt_Srv, Srg-33-like	sensory perception of chemical stimulus, transmembrane signaling receptor activity, membrane, integral component of membrane	NA	NA	SPAL_0001029300	62.6374	SVE_0495300	31.044	NA	NA
Up in iL3	SSTP_0001196800	1.91138	1.98653	2.56709	-3.1661	-2.17991	-2.38615	1.99, IQR = 1.95 to 2.28	-2.39, IQR = -2.78 to -2.28	4.62395	6.92023e-10	14.0603	A0A0K0ER83	NA	7TM_GPCR_serpentine_rcpt_Srd	membrane, integral component of membrane	SRAE_1000223600	62.9412	SPAL_0001395500	47.0588	SVE_1826000	42.3529	NA	NA
Up in iL3	SSTP_0000382000	-0.507025	0.334541	0.260028	-4.75386	-4.10056	-4.89731	0.26, IQR = -0.12 to 0.3	-4.75, IQR = -4.83 to -4.43	4.58396	3.09749e-08	9.91373	A0A0K0E2V1	NA	GPCR_Rhodpsn_7TM, 7TM_GPCR_serpentine_rcpt_Srv, Srg-33-like	sensory perception of chemical stimulus, transmembrane signaling receptor activity, integral component of membrane, membrane	SRAE_2000482800	47.6974	SPAL_0000062700	30.9211	SVE_0238100	31.5789	NA	NA
Up in iL3	SSTP_0001115900	0.422742	1.87416	1.98078	-3.16867	-3.25303	-3.02377	1.87, IQR = 1.15 to 1.93	-3.17, IQR = -3.21 to -3.1	4.52874	1.03925e-06	6.47668	A0A0K0ENX2	NA	GPCR_Rhodpsn_7TM, 7TM_GPCR_Srsx	integral component of membrane, membrane	SRAE_2000450100	48.4472	SPAL_0000411600	19.5652	NA	NA	NA	NA
Up in iL3	SSTP_0000209200	0.941496	0.656267	1.3135	-1.94482	-3.61751	-4.15793	0.94, IQR = 0.8 to 1.13	-3.62, IQR = -3.89 to -2.78	4.38211	6.88842e-09	11.5842	A0A0K0DXX8	Serpentine receptor class gamma	7TM_GPCR_serpentine_rcpt_Srg	sensory perception of chemical stimulus, transmembrane signaling receptor activity, membrane, integral component of membrane	SRAE_2000414400	69.7368	NA	NA	SVE_2022200	42.9825	NA	NA
Up in iL3	SSTP_0001111200	-0.16926	-0.616918	-0.948602	-3.16829	-4.8379	-6.48331	-0.62, IQR = -0.78 to -0.39	-4.84, IQR = -5.66 to -4	4.36911	1.32162e-06	6.19068	A0A0K0ENS5	NA	GPCR_Rhodpsn_7TM, 7TM_GPCR_serpentine_rcpt_Srx	integral component of membrane, membrane	NA	NA	SPAL_0001229216	40.5844	SVE_2022700	36.039	NA	NA
Up in iL3	SSTP_0000381900	2.00782	2.70187	2.64818	-1.05319	-2.03054	-2.23547	2.65, IQR = 2.33 to 2.68	-2.03, IQR = -2.13 to -1.54	4.32493	5.49242e-09	11.9782	A0A0K0E2V0	NA	7TM_GPCR_serpentine_rcpt_Sre	sensory perception of chemical stimulus, integral component of membrane, membrane	SRAE_2000482900	81.7629	SPAL_0000606300	65.6535	SVE_1566000	66.8693	NA	NA
Up in iL3	SSTP_0000423100	0.797885	0.94634	1.18189	-4.75386	-3.61563	-2.23478	0.95, IQR = 0.87 to 1.06	-3.62, IQR = -4.18 to -2.93	4.32357	1.35155e-06	6.20786	A0A0K0E414	NA	GPCR_Rhodpsn, GPCR_Rhodpsn_7TM, 7TM_GPCR_serpentine_rcpt_Srv, Srg-33-like	G protein-coupled receptor signaling pathway, G protein-coupled receptor activity, sensory perception of chemical stimulus, transmembrane signaling receptor activity, integral component of membrane, membrane	NA	NA	NA	NA	SVE_1568900	50	NA	NA
Up in iL3	SSTP_0001173300	2.81137	2.66233	2.6151	-2.43151	-1.13778	-1.52856	2.66, IQR = 2.64 to 2.74	-1.53, IQR = -1.98 to -1.33	4.28568	4.29647e-10	14.6969	NA	NA	NA	NA	SRAE_0000033100	72.6384	SPAL_0001592300	71.3355	SVE_0997500	75.57	H09F14.1	33.2248
Up in iL3	SSTP_0000860100	2.27621	2.33817	2.42656	-1.29407	-1.29372	-2.78266	2.34, IQR = 2.31 to 2.38	-1.29, IQR = -2.04 to -1.29	4.21681	5.87356e-07	7.03513	A0A0K0EGI9	NA	7TM_GPCR_serpentine_rcpt_Srv	membrane, integral component of membrane	SRAE_X000039900	44.0252	NA	NA	NA	NA	NA	NA
Up in iL3	SSTP_0000431100	3.47919	3.60611	3.15428	-0.667316	-1.21174	-0.420281	3.48, IQR = 3.32 to 3.54	-0.67, IQR = -0.94 to -0.54	4.2029	7.06612e-11	16.7735	A0A0K0E492	NA	GPCR_Rhodpsn, GPCR_Rhodpsn_7TM	G protein-coupled receptor signaling pathway, G protein-coupled receptor activity, integral component of membrane, membrane	SRAE_X000170800	77.3512	SPAL_0000358300	72.3608	SVE_0664200	69.0979	NA	NA
Up in iL3	SSTP_0001168000	-1.28197	-0.554985	-1.72013	-4.75386	-6.42301	-4.89846	-1.28, IQR = -1.5 to -0.92	-4.9, IQR = -5.66 to -4.83	4.19288	7.39093e-06	4.46856	A0A0K0EQF1	NA	7TM_GPCR_serpentine_rcpt_Srv	membrane, integral component of membrane	SRAE_1000020200	58.147	SPAL_0001545000	65.8147	SVE_0338500	58.7859	NA	NA
Up in iL3	SSTP_0000993200	3.34598	4.03696	3.50654	-0.506858	-0.192343	-0.871641	3.51, IQR = 3.43 to 3.77	-0.51, IQR = -0.69 to -0.35	4.15954	5.43662e-10	14.5461	A0A0K0EKD8	NA	GPCR_Rhodpsn_7TM	integral component of membrane, membrane	SRAE_1000101200	83.6852	SPAL_0000244000	76.5835	SVE_0001600	76.5835	T11F9.1	33.5893
Up in iL3	SSTP_0001185400	3.27545	3.90788	3.87685	-0.361903	-0.640634	-0.335173	3.88, IQR = 3.58 to 3.89	-0.36, IQR = -0.5 to -0.35	4.13395	2.02675e-10	15.633	A0A0K0EQX3	NA	GPCR_Rhodpsn_7TM	integral component of membrane, membrane	SRAE_1000259700	83.5821	SPAL_0000172100	77.6119	NA	NA	NA	NA
Up in iL3	SSTP_0000564300	1.13265	2.02748	2.1651	-2.43111	-2.72093	-1.95957	2.03, IQR = 1.58 to 2.1	-2.43, IQR = -2.58 to -2.2	4.10549	4.3133e-07	7.3792	A0A0K0E813	NA	7TM_GPCR_serpentine_rcpt_Str	membrane, integral component of membrane	SRAE_1000292700	32.6027	SPAL_0000937875	37.8082	SVE_0037600	24.9315	NA	NA
Up in iL3	SSTP_0000363000	2.756	3.25524	3.39015	-0.846617	-0.540347	-0.810687	3.26, IQR = 3.01 to 3.32	-0.81, IQR = -0.83 to -0.68	3.83306	6.13433e-11	16.928	A0A0K0E2A8	NA	GPCR_Rhodpsn, 7TM_GPCR_Srsx	G protein-coupled receptor signaling pathway, G protein-coupled receptor activity, integral component of membrane, membrane	SRAE_2000474200	89.0282	SPAL_0001079400	81.5047	SVE_1655800	81.1912	NA	NA
Up in iL3	SSTP_0000941900	1.8254	0.946637	1.48743	-1.94632	-2.33535	-2.57658	1.49, IQR = 1.22 to 1.66	-2.34, IQR = -2.46 to -2.14	3.76353	1.77872e-08	10.7085	A0A0K0EIW3	NA	7TM_GPCR_serpentine_rcpt_Srv	membrane, integral component of membrane	SRAE_2000512000	71.6867	SPAL_0000410300	65.9639	SVE_1570600	43.0723	NA	NA
Up in iL3	SSTP_0000166700	0.140459	-0.553361	0.907775	-2.43117	-3.61485	-3.67548	0.14, IQR = -0.21 to 0.52	-3.61, IQR = -3.65 to -3.02	3.49159	3.11129e-05	3.00189	A0A0K0DWQ0	NA	7TM_GPCR_serpentine_rcpt_Str	membrane, integral component of membrane	SRAE_0000000250	65.0602	SPAL_0000619700	44.5783	SVE_1102400	19.8795	NA	NA
Up in iL3	SSTP_0000956800	2.78265	3.84805	3.93012	0.00224508	0.083678	0.0887283	3.85, IQR = 3.32 to 3.89	0.08, IQR = 0.04 to 0.09	3.4269	1.69258e-07	8.24193	A0A0K0EJC2	NA	7TM_GPCR_serpentine_rcpt_Srt	membrane, integral component of membrane	NA	NA	SPAL_0001749300	59.8485	SVE_1103100	59.4697	srt-43	26.8939
Up in iL3	SSTP_0001190900	4.30874	4.56429	4.65641	1.43731	1.41487	1.30718	4.56, IQR = 4.44 to 4.61	1.41, IQR = 1.36 to 1.43	3.12809	2.81227e-11	17.9509	A0A0K0ER27	NA	7TM_GPCR_serpentine_rcpt_Srv	membrane, integral component of membrane	SRAE_1000075200	94.5312	SPAL_0000744100	94.9219	SVE_1021000	94.5312	NA	NA
Up in iL3	SSTP_0000686100	0.272078	1.23961	1.72445	-1.94607	-0.808444	-1.83897	1.24, IQR = 0.76 to 1.48	-1.84, IQR = -1.89 to -1.32	2.50486	2.67212e-05	3.04045	A0A0K0EBI9	NA	7TM_GPCR_serpentine_rcpt_Srx	membrane, integral component of membrane	SRAE_2000514400	56.9579	SPAL_0000982400	52.1036	SVE_1573100	42.3948	NA	NA
Up in iL3	SSTP_0001059800	3.22706	3.63213	3.51185	0.86054	1.09363	1.03092	3.51, IQR = 3.37 to 3.57	1.03, IQR = 0.95 to 1.06	2.42952	1.52549e-07	8.26868	A0A0K0EMB0	NA	GPCR_Rhodpsn_7TM	integral component of membrane, membrane	SRAE_X000186100	86.2595	SPAL_0001467100	82.9517	SVE_0819600	47.0738	Y37E11AL.1	40.7125
Up in iL3	SSTP_0001110100	0.302488	-0.495532	0.0269276	-1.58249	-2.51691	-2.39338	0.03, IQR = -0.23 to 0.16	-2.39, IQR = -2.46 to -1.99	2.20128	0.0015765	-1.06498	A0A0K0ENR4	NA	NA	membrane, integral component of membrane	SRAE_2000478200	55.7252	SPAL_0000669600	59.1603	SVE_1184100	58.3969	NA	NA
Up in iL3	SSTP_0000207250	0.925011	0.000409147	0.122625	-2.43242	-1.29321	-1.73006	0.12, IQR = 0.06 to 0.52	-1.73, IQR = -2.08 to -1.51	2.09262	0.0008675	-0.506029	A0A0K0DXV8	NA	GPCR_Rhodpsn_7TM, 7TM_GPCR_serpentine_rcpt_Srd	integral component of membrane, membrane	SRAE_2000412500	16.5803	SPAL_0001736700	29.7927	NA	NA	NA	NA
Up in iL3	SSTP_0001007400	0.609891	0.157795	-0.134617	-1.29404	-1.56507	-2.09069	0.16, IQR = 0.01 to 0.38	-1.57, IQR = -1.83 to -1.43	1.94066	0.000153463	1.26748	A0A0K0EKT3	NA	GPCR_Rhodpsn, GPCR_Rhodpsn_7TM, 7TM_GPCR_Srsx	G protein-coupled receptor signaling pathway, G protein-coupled receptor activity, integral component of membrane, membrane	SRAE_2000105700	77.4603	NA	NA	SVE_0515000	70.7936	srsx-25	39.3651
Up in iL3	SSTP_0001086200	1.80343	1.95184	2.51933	0.10446	0.235253	0.482615	1.95, IQR = 1.88 to 2.24	0.24, IQR = 0.17 to 0.36	1.76093	1.10228e-05	3.7742	A0A0K0EN24	NA	7TM_GPCR_serpentine_rcpt_Srv	membrane, integral component of membrane	SRAE_1000111700	80.6854	SPAL_0000276400	73.2087	SVE_0085400	67.6012	NA	NA
Up in iL3	SSTP_0000287100	1.74869	2.79637	2.34691	0.290156	0.696981	0.503722	2.35, IQR = 2.05 to 2.57	0.5, IQR = 0.4 to 0.6	1.74907	4.68723e-06	4.65347	A0A0K0E055	NA	GPCR_Rhodpsn, GPCR_Rhodpsn_7TM	G protein-coupled receptor signaling pathway, G protein-coupled receptor activity, integral component of membrane, membrane	SRAE_1000159300	90.099	SPAL_0000795200	85.1485	SVE_1056900	79.2079	F32D8.10	37.1287
Up in iL3	SSTP_0001115800	-1.378	-0.132185	-0.597563	-2.43153	-2.33592	-2.23476	-0.6, IQR = -0.99 to -0.36	-2.34, IQR = -2.38 to -2.29	1.60201	0.00601949	-2.37251	A0A0K0ENX1	NA	7TM_GPCR_serpentine_rcpt_Sre	sensory perception of chemical stimulus, integral component of membrane, membrane	SRAE_2000450200	28.2392	SPAL_0000411500	46.8439	SVE_1569200	46.5116	NA	NA
Up in iL3	SSTP_0000607500	-0.0857237	0.0409005	0.668609	-0.846653	-0.931094	-1.83935	0.04, IQR = -0.02 to 0.35	-0.93, IQR = -1.39 to -0.89	1.45295	0.00483031	-2.30072	A0A0K0E991	NA	7TM_GPCR_serpentine_rcpt_Srx	membrane, integral component of membrane	NA	NA	SPAL_0001210700	38.5093	SVE_0642600	32.2981	NA	NA

## Sheet: iL3 vs pfL1
File S6. S. stercoralis chemoreceptor differential gene expression results table: iL3s vs all other life stages
An example .xlsx results file generated by the Strongyloides RNA-seq Browser containing a differential gene expression table listing 64 S. stercoralis chemoreceptors that are consistently upregulated in iL3s versus all other life stages.
S. stercoralis RNA-seq Differential Gene Expression
Contrast: iL3-pfL1
Report generated on March 13, 2021
Columns labeled with <life stage - sample ID> report log2 counts per million (CPM) expression. Columns labeled avg_<life stage> are median log2CPM with IQR. The column labeled logFC reports log2 fold change.
P-values corrected across the following multiple pairwise comparisons: iL3-FLF; iL3-iL3a; iL3-PF; iL3-pfL1; iL3-ppL1; iL3-ppL3
Lists include genes that are differentially regulated in the following directions (relative to the target life stage): Up; Down; NotSig
Percentage of genes for each differential expression pattern: 100
Lists only include genes with matching differential expression descriptions across the following pairwise comparisons: iL3-FLF; iL3-iL3a; iL3-PF; iL3-pfL1; iL3-ppL1; iL3-ppL3
DEG_Desc	geneID	iL3-ERR146947	iL3-ERR146948	iL3-ERR146949	pfL1-ERR146950	pfL1-ERR146951	pfL1-ERR146952	avg_(iL3)	avg_(pfL1)	logFC	BH.adj.P.Val	LogOdds	UniProtKB	Description	InterPro	GO_term	In.subclade_geneID	In.subclade_percent_homology	Out.subclade_geneID	Out.subclade_percent_homology	Out2.subclade_geneID	Out2.subclade_percent_homology	Ce_geneID	Ce_percent_homology
Up in iL3	SSTP_0000443050	2.09851	2.79944	2.74474	-3.52163	-6.79969	-4.27475	2.74, IQR = 2.42 to 2.77	-4.27, IQR = -5.54 to -3.9	7.42128	4.13065e-08	10.4937	A0A0K0E4L1	NA	7TM_GPCR_serpentine_rcpt_Srt	membrane, integral component of membrane	SRAE_X000197650	63.0769	NA	NA	NA	NA	srt-43	21.9231
Up in iL3	SSTP_0000020000	0.681081	0.68302	1.35338	-6.69128	-6.79969	-5.0123	0.68, IQR = 0.68 to 1.02	-6.69, IQR = -6.75 to -5.85	7.0506	1.28139e-08	11.3509	A0A0K0DSI8	Serpentine receptor class gamma	7TM_GPCR_serpentine_rcpt_Srg	sensory perception of chemical stimulus, transmembrane signaling receptor activity, membrane, integral component of membrane	SRAE_1000236400	73.3068	SPAL_0000368200	62.9482	NA	NA	NA	NA
Up in iL3	SSTP_0000382000	-0.507025	0.334541	0.260028	-6.69128	-6.79969	-6.59638	0.26, IQR = -0.12 to 0.3	-6.69, IQR = -6.75 to -6.64	6.70649	1.38995e-09	13.315	A0A0K0E2V1	NA	GPCR_Rhodpsn_7TM, 7TM_GPCR_serpentine_rcpt_Srv, Srg-33-like	sensory perception of chemical stimulus, transmembrane signaling receptor activity, integral component of membrane, membrane	SRAE_2000482800	47.6974	SPAL_0000062700	30.9211	SVE_0238100	31.5789	NA	NA
Up in iL3	SSTP_0000958500	0.68365	1.78016	1.67705	-5.1061	-5.21463	-5.01075	1.68, IQR = 1.18 to 1.73	-5.11, IQR = -5.16 to -5.06	6.46708	7.61078e-07	7.41768	A0A0K0EJD9	NA	7TM_GPCR_serpentine_rcpt_Srt	membrane, integral component of membrane	SRAE_0000002700	58.6207	SPAL_0001751500	54.8589	SVE_1105400	58.6207	srt-44	28.8401
Up in iL3	SSTP_0000113900	1.27386	1.19763	1.63518	-5.10538	-5.21963	-4.27705	1.27, IQR = 1.24 to 1.45	-5.11, IQR = -5.16 to -4.69	6.23164	4.96697e-09	12.5779	A0A0K0DV71	NA	NA	membrane, integral component of membrane	SRAE_2000471650	78.8732	NA	NA	SVE_0341200	64.7887	NA	NA
Up in iL3	SSTP_0000836800	1.93034	2.35566	2.85463	-2.78384	-4.47695	-3.78764	2.36, IQR = 2.14 to 2.61	-3.79, IQR = -4.13 to -3.29	6.04398	6.07668e-08	10.2663	A0A0K0EFW1	NA	7TM_GPCR_serpentine_rcpt_Srt	membrane, integral component of membrane	SRAE_1000322800	47.0588	SPAL_0001660500	38.0952	SVE_1947200	37.2549	NA	NA
Up in iL3	SSTP_0000478400	-0.744306	0.194223	0.300968	-6.69128	-4.47845	-6.59638	0.19, IQR = -0.28 to 0.25	-6.6, IQR = -6.64 to -5.54	5.81289	2.67862e-07	8.337	A0A0K0E5J8	NA	NA	membrane, integral component of membrane	SRAE_2000422600	55.0955	SPAL_0000260300	32.1656	SVE_0059100	22.9299	NA	NA
Up in iL3	SSTP_0000425400	1.13079	2.19925	2.5927	-3.23058	-2.89356	-5.01072	2.2, IQR = 1.67 to 2.4	-3.23, IQR = -4.12 to -3.06	5.62448	1.33252e-07	9.4146	A0A0K0E435	Serpentine receptor class gamma	7TM_GPCR_serpentine_rcpt_Srg	sensory perception of chemical stimulus, transmembrane signaling receptor activity, membrane, integral component of membrane	NA	NA	NA	NA	NA	NA	NA	NA
Up in iL3	SSTP_0000564300	1.13265	2.02748	2.1651	-3.52009	-4.47619	-3.42422	2.03, IQR = 1.58 to 2.1	-3.52, IQR = -4 to -3.47	5.56428	6.47654e-08	10.1658	A0A0K0E813	NA	7TM_GPCR_serpentine_rcpt_Str	membrane, integral component of membrane	SRAE_1000292700	32.6027	SPAL_0000937875	37.8082	SVE_0037600	24.9315	NA	NA
Up in iL3	SSTP_0000554700	1.879	1.69275	2.19971	-3.52053	-3.6293	-3.13558	1.88, IQR = 1.79 to 2.04	-3.52, IQR = -3.57 to -3.33	5.34501	1.58183e-08	11.7162	A0A0K0E7S2	NA	NA	membrane, integral component of membrane	SRAE_1000279900	60.0649	SPAL_0000683400	55.5195	SVE_0863100	66.8831	NA	NA
Up in iL3	SSTP_0000385000	0.964404	0.334184	0.568923	-3.23135	-3.99242	-6.59638	0.57, IQR = 0.45 to 0.77	-3.99, IQR = -5.29 to -3.61	5.21521	1.20259e-06	6.95729	A0A0K0E2Y1	NA	7TM_GPCR_serpentine_rcpt_Sre	sensory perception of chemical stimulus, integral component of membrane, membrane	SRAE_2000498600	74.4108	NA	NA	NA	NA	NA	NA
Up in iL3	SSTP_0001115900	0.422742	1.87416	1.98078	-3.23182	-3.99242	-2.89526	1.87, IQR = 1.15 to 1.93	-3.23, IQR = -3.61 to -3.06	4.76831	5.39592e-07	7.91054	A0A0K0ENX2	NA	GPCR_Rhodpsn_7TM, 7TM_GPCR_Srsx	integral component of membrane, membrane	SRAE_2000450100	48.4472	SPAL_0000411600	19.5652	NA	NA	NA	NA
Up in iL3	SSTP_0000166700	0.140459	-0.553361	0.907775	-4.36869	-4.47707	-5.0103	0.14, IQR = -0.21 to 0.52	-4.48, IQR = -4.74 to -4.42	4.74953	3.56088e-06	5.80023	A0A0K0DWQ0	NA	7TM_GPCR_serpentine_rcpt_Str	membrane, integral component of membrane	SRAE_0000000250	65.0602	SPAL_0000619700	44.5783	SVE_1102400	19.8795	NA	NA
Up in iL3	SSTP_0000381900	2.00782	2.70187	2.64818	-2.78432	-1.51423	-2.50806	2.65, IQR = 2.33 to 2.68	-2.51, IQR = -2.65 to -2.01	4.69471	3.81211e-09	13.4744	A0A0K0E2V0	NA	7TM_GPCR_serpentine_rcpt_Sre	sensory perception of chemical stimulus, integral component of membrane, membrane	SRAE_2000482900	81.7629	SPAL_0000606300	65.6535	SVE_1566000	66.8693	NA	NA
Up in iL3	SSTP_0000425800	3.68275	4.76634	4.69515	-0.424133	-0.290841	-0.119143	4.7, IQR = 4.19 to 4.73	-0.29, IQR = -0.36 to -0.2	4.64441	1.04554e-09	15.163	A0A0K0E440	NA	GPCR_Rhodpsn, GPCR_Rhodpsn_7TM	G protein-coupled receptor signaling pathway, G protein-coupled receptor activity, integral component of membrane, membrane	SRAE_2000446700	86.4721	NA	NA	SVE_0340900	81.4324	NA	NA
Up in iL3	SSTP_0001106100	0.647601	0.821824	0.936833	-3.52501	-4.00353	-3.79639	0.82, IQR = 0.73 to 0.88	-3.8, IQR = -3.9 to -3.66	4.57074	7.20822e-09	12.416	A0A0K0ENM4	NA	7TM_GPCR_serpentine_rcpt_Srv	membrane, integral component of membrane	SRAE_1000020300	25.5172	NA	NA	NA	NA	NA	NA
Up in iL3	SSTP_0000956800	2.78265	3.84805	3.93012	-0.387942	-0.824325	-0.982123	3.85, IQR = 3.32 to 3.89	-0.82, IQR = -0.9 to -0.61	4.22539	3.51159e-08	11.0423	A0A0K0EJC2	NA	7TM_GPCR_serpentine_rcpt_Srt	membrane, integral component of membrane	NA	NA	SPAL_0001749300	59.8485	SVE_1103100	59.4697	srt-43	26.8939
Up in iL3	SSTP_0001190900	4.30874	4.56429	4.65641	0.7594	0.455353	0.297773	4.56, IQR = 4.44 to 4.61	0.46, IQR = 0.38 to 0.61	3.99724	7.87872e-12	21.2014	A0A0K0ER27	NA	7TM_GPCR_serpentine_rcpt_Srv	membrane, integral component of membrane	SRAE_1000075200	94.5312	SPAL_0000744100	94.9219	SVE_1021000	94.5312	NA	NA
Up in iL3	SSTP_0000860100	2.27621	2.33817	2.42656	-0.909915	-1.18518	-2.68886	2.34, IQR = 2.31 to 2.38	-1.19, IQR = -1.94 to -1.05	3.92037	6.69054e-07	7.68919	A0A0K0EGI9	NA	7TM_GPCR_serpentine_rcpt_Srv	membrane, integral component of membrane	SRAE_X000039900	44.0252	NA	NA	NA	NA	NA	NA
Up in iL3	SSTP_0000554600	0.240778	0.578202	0.2592	-3.88355	-3.62933	-2.89474	0.26, IQR = 0.25 to 0.42	-3.63, IQR = -3.76 to -3.26	3.83741	7.96871e-08	9.92562	A0A0K0E7S1	NA	NA	membrane, integral component of membrane	SRAE_1000280000	72.0721	SPAL_0001687000	63.6637	SVE_0863000	59.1592	NA	NA
Up in iL3	SSTP_0000423100	0.797885	0.94634	1.18189	-2.16762	-2.89305	-3.42583	0.95, IQR = 0.87 to 1.06	-2.89, IQR = -3.16 to -2.53	3.78717	1.73632e-06	6.63892	A0A0K0E414	NA	GPCR_Rhodpsn, GPCR_Rhodpsn_7TM, 7TM_GPCR_serpentine_rcpt_Srv, Srg-33-like	G protein-coupled receptor signaling pathway, G protein-coupled receptor activity, sensory perception of chemical stimulus, transmembrane signaling receptor activity, integral component of membrane, membrane	NA	NA	NA	NA	SVE_1568900	50	NA	NA
Up in iL3	SSTP_0001111100	-0.305668	-0.328571	-0.078374	-4.36944	-3.99346	-3.42644	-0.31, IQR = -0.32 to -0.19	-3.99, IQR = -4.18 to -3.71	3.69037	3.71341e-07	8.22206	A0A0K0ENS4	NA	GPCR_Rhodpsn_7TM, 7TM_GPCR_serpentine_rcpt_Srx	integral component of membrane, membrane	SRAE_2000476900	56.5693	SPAL_0001229232	55.1095	SVE_1000654750	63.5037	NA	NA
Up in iL3	SSTP_0000415000	2.87577	3.42461	3.04149	-0.462392	-0.356706	-0.573129	3.04, IQR = 2.96 to 3.23	-0.46, IQR = -0.52 to -0.41	3.57391	1.63139e-10	17.3784	A0A0K0E3T0	NA	7TM_GPCR_serpentine_rcpt_Str	membrane, integral component of membrane	NA	NA	SPAL_0000464500	71.9512	NA	NA	str-182	14.3293
Up in iL3	SSTP_0000207250	0.925011	0.000409147	0.122625	-2.78433	-2.89198	-3.78794	0.12, IQR = 0.06 to 0.52	-2.89, IQR = -3.34 to -2.84	3.51501	1.43332e-05	4.34436	A0A0K0DXV8	NA	GPCR_Rhodpsn_7TM, 7TM_GPCR_serpentine_rcpt_Srd	integral component of membrane, membrane	SRAE_2000412500	16.5803	SPAL_0001736700	29.7927	NA	NA	NA	NA
Up in iL3	SSTP_0000346000	5.6919	5.23809	5.64086	2.55458	1.85366	2.20835	5.64, IQR = 5.44 to 5.67	2.21, IQR = 2.03 to 2.38	3.32194	1.17778e-11	20.8072	A0A0K0E1U1	Serpentine receptor class gamma	7TM_GPCR_serpentine_rcpt_Srg	sensory perception of chemical stimulus, transmembrane signaling receptor activity, membrane, integral component of membrane	SRAE_1000032000	78.4	SPAL_0000389200	73.6	SVE_1157700	77.6	NA	NA
Up in iL3	SSTP_0001016200	1.40321	1.7157	1.94285	-1.94014	-1.14162	-1.74895	1.72, IQR = 1.56 to 1.83	-1.75, IQR = -1.84 to -1.45	3.27412	1.26428e-07	9.57834	A0A0K0EL18	NA	NA	membrane, integral component of membrane	NA	NA	NA	NA	NA	NA	NA	NA
Up in iL3	SSTP_0001182400	0.271504	1.10941	0.851178	-1.93678	-2.55278	-2.89589	0.85, IQR = 0.56 to 0.98	-2.55, IQR = -2.72 to -2.24	3.18913	6.63344e-06	5.16147	A0A0K0EQU3	NA	GPCR_Rhodpsn_7TM, 7TM_GPCR_serpentine_rcpt_Srx	integral component of membrane, membrane	SRAE_1000256800	77.7027	SPAL_0000865400	66.8919	SVE_1042900	66.5541	srx-47	17.5676
Up in iL3	SSTP_0001196800	1.91138	1.98653	2.56709	-0.544491	-1.19323	-1.17474	1.99, IQR = 1.95 to 2.28	-1.17, IQR = -1.18 to -0.86	3.10549	7.08084e-09	12.8716	A0A0K0ER83	NA	7TM_GPCR_serpentine_rcpt_Srd	membrane, integral component of membrane	SRAE_1000223600	62.9412	SPAL_0001395500	47.0588	SVE_1826000	42.3529	NA	NA
Up in iL3	SSTP_0000607500	-0.0857237	0.0409005	0.668609	-2.99081	-2.8929	-2.50822	0.04, IQR = -0.02 to 0.35	-2.89, IQR = -2.94 to -2.7	2.98564	2.32921e-05	3.81581	A0A0K0E991	NA	7TM_GPCR_serpentine_rcpt_Srx	membrane, integral component of membrane	NA	NA	SPAL_0001210700	38.5093	SVE_0642600	32.2981	NA	NA
Up in iL3	SSTP_0000543000	0.659146	1.55632	2.16386	-1.4062	-1.37364	-1.46655	1.56, IQR = 1.11 to 1.86	-1.41, IQR = -1.44 to -1.39	2.82982	0.000186671	1.43596	A0A0K0E7F3	NA	7TM_GPCR_serpentine_rcpt_Str	membrane, integral component of membrane	SRAE_1000230900	55.6548	SPAL_0000380400	50	SVE_1276100	48.2143	NA	NA
Up in iL3	SSTP_0000537400	0.883331	1.67875	1.77146	-1.26461	-1.30829	-1.6415	1.68, IQR = 1.28 to 1.73	-1.31, IQR = -1.47 to -1.29	2.82132	2.11239e-06	6.39275	A0A0K0E798	NA	7TM_GPCR_serpentine_rcpt_Srd	membrane, integral component of membrane	SRAE_2000459500	55.0523	SPAL_0000036900	14.9826	SVE_0266000	43.554	NA	NA
Up in iL3	SSTP_0000959400	2.11751	2.28757	2.26447	-0.281922	-0.610204	-0.923377	2.26, IQR = 2.19 to 2.28	-0.61, IQR = -0.77 to -0.45	2.82096	2.91003e-09	13.9373	A0A0K0EJE8	NA	GPCR_Rhodpsn_7TM, 7TM_GPCR_serpentine_rcpt_Srx	integral component of membrane, membrane	SRAE_0000012400	70.2875	SPAL_0000022600	61.9808	SVE_0900100	57.1885	srx-46	19.1693
Up in iL3	SSTP_0000356800	0.683939	0.989737	1.08824	-1.93583	-1.12682	-2.68828	0.99, IQR = 0.84 to 1.04	-1.94, IQR = -2.31 to -1.53	2.8084	7.53416e-07	7.56965	A0A0K0E247	NA	7TM_GPCR_serpentine_rcpt_Sri	membrane, integral component of membrane	SRAE_2000169600	55.5901	NA	NA	SVE_1996600	20.4969	NA	NA
Up in iL3	SSTP_0000686100	0.272078	1.23961	1.72445	-1.73715	-1.30828	-2.07232	1.24, IQR = 0.76 to 1.48	-1.74, IQR = -1.9 to -1.52	2.73339	8.19714e-06	4.89657	A0A0K0EBI9	NA	7TM_GPCR_serpentine_rcpt_Srx	membrane, integral component of membrane	SRAE_2000514400	56.9579	SPAL_0000982400	52.1036	SVE_1573100	42.3948	NA	NA
Up in iL3	SSTP_0001159500	1.82741	2.02805	2.45359	-0.0609754	-0.688325	-0.865845	2.03, IQR = 1.93 to 2.24	-0.69, IQR = -0.78 to -0.37	2.62028	2.41623e-07	8.82424	A0A0K0EQ66	NA	GPCR_Rhodpsn, GPCR_Rhodpsn_7TM, 7TM_GPCR_serpentine_rcpt_Srw	G protein-coupled peptide receptor activity, G protein-coupled receptor signaling pathway, G protein-coupled receptor activity, integral component of membrane, membrane	NA	NA	NA	NA	NA	NA	NA	NA
Up in iL3	SSTP_0000363000	2.756	3.25524	3.39015	0.488639	0.634756	0.564183	3.26, IQR = 3.01 to 3.32	0.56, IQR = 0.53 to 0.6	2.55517	8.23207e-10	15.4699	A0A0K0E2A8	NA	GPCR_Rhodpsn, 7TM_GPCR_Srsx	G protein-coupled receptor signaling pathway, G protein-coupled receptor activity, integral component of membrane, membrane	SRAE_2000474200	89.0282	SPAL_0001079400	81.5047	SVE_1655800	81.1912	NA	NA
Up in iL3	SSTP_0001065400	-0.949065	-0.274961	-0.13351	-2.16663	-2.7114	-3.78749	-0.27, IQR = -0.61 to -0.2	-2.71, IQR = -3.25 to -2.44	2.40587	0.000747535	0.127633	A0A0K0EMG5	NA	7TM_GPCR_serpentine_rcpt_Srx	membrane, integral component of membrane	NA	NA	NA	NA	SVE_0366100	54.7468	NA	NA
Up in iL3	SSTP_0000697000	5.6913	5.94111	6.38069	3.70491	3.59148	3.53633	5.94, IQR = 5.82 to 6.16	3.59, IQR = 3.56 to 3.65	2.38483	1.8729e-10	17.24	A0A0K0EBV0	NA	NA	membrane, integral component of membrane	SRAE_2000389700	87.4439	SPAL_0000874100	82.7354	SVE_0731300	84.7534	NA	NA
Up in iL3	SSTP_0001250400	4.05255	4.00004	4.35552	2.17661	1.66574	1.63927	4.05, IQR = 4.03 to 4.2	1.67, IQR = 1.65 to 1.92	2.30122	6.96392e-09	12.8354	A0A0K0ESS4	NA	GPCR_Rhodpsn_7TM	integral component of membrane, membrane	SRAE_X000114200	94.4573	SPAL_0000696000	86.836	SVE_0624200	86.836	ZK1307.7	44.1109
Up in iL3	SSTP_0000425000	1.09557	0.810176	1.41181	-0.909914	-1.37332	-1.10365	1.1, IQR = 0.95 to 1.25	-1.1, IQR = -1.24 to -1.01	2.22545	7.21243e-05	2.45934	A0A0K0E431	Serpentine receptor class gamma	7TM_GPCR_serpentine_rcpt_Srg	sensory perception of chemical stimulus, transmembrane signaling receptor activity, membrane, integral component of membrane	SRAE_2000446900	35.119	SPAL_0000084400	48.5119	NA	NA	NA	NA
Up in iL3	SSTP_0000993200	3.34598	4.03696	3.50654	1.5717	1.46523	1.16776	3.51, IQR = 3.43 to 3.77	1.47, IQR = 1.32 to 1.52	2.22423	2.92317e-08	11.1542	A0A0K0EKD8	NA	GPCR_Rhodpsn_7TM	integral component of membrane, membrane	SRAE_1000101200	83.6852	SPAL_0000244000	76.5835	SVE_0001600	76.5835	T11F9.1	33.5893
Up in iL3	SSTP_0000479900	5.11669	5.05997	5.12674	3.05305	2.78726	2.856	5.12, IQR = 5.09 to 5.12	2.86, IQR = 2.82 to 2.95	2.20283	1.33722e-11	20.6359	A0A0K0E5L3	NA	GPCR_Rhodpsn_7TM	integral component of membrane, membrane	SRAE_2000421000	57.7259	SPAL_0000141100	52.7697	SVE_0883800	53.0612	C47E8.3	21.137
Up in iL3	SSTP_0001086200	1.80343	1.95184	2.51933	0.0502123	-0.424779	0.0336905	1.95, IQR = 1.88 to 2.24	0.03, IQR = -0.2 to 0.04	2.18932	9.50135e-07	7.2216	A0A0K0EN24	NA	7TM_GPCR_serpentine_rcpt_Srv	membrane, integral component of membrane	SRAE_1000111700	80.6854	SPAL_0000276400	73.2087	SVE_0085400	67.6012	NA	NA
Up in iL3	SSTP_0000941900	1.8254	0.946637	1.48743	-0.858295	-0.495777	-0.923022	1.49, IQR = 1.22 to 1.66	-0.86, IQR = -0.89 to -0.68	2.1779	1.25953e-06	6.9487	A0A0K0EIW3	NA	7TM_GPCR_serpentine_rcpt_Srv	membrane, integral component of membrane	SRAE_2000512000	71.6867	SPAL_0000410300	65.9639	SVE_1570600	43.0723	NA	NA
Up in iL3	SSTP_0001115800	-1.378	-0.132185	-0.597563	-2.16794	-3.99301	-2.34819	-0.6, IQR = -0.99 to -0.36	-2.35, IQR = -3.17 to -2.26	2.13746	0.000726586	0.164425	A0A0K0ENX1	NA	7TM_GPCR_serpentine_rcpt_Sre	sensory perception of chemical stimulus, integral component of membrane, membrane	SRAE_2000450200	28.2392	SPAL_0000411500	46.8439	SVE_1569200	46.5116	NA	NA
Up in iL3	SSTP_0000964100	7.0681	7.4944	7.16413	5.28656	5.31015	5.26777	7.16, IQR = 7.12 to 7.33	5.29, IQR = 5.28 to 5.3	1.95394	2.73344e-10	16.6693	A0A0K0EJJ5	NA	GPCR_Rhodpsn, GPCR_Rhodpsn_7TM, 7TM_GPCR_serpentine_rcpt_Srw	G protein-coupled peptide receptor activity, G protein-coupled receptor signaling pathway, G protein-coupled receptor activity, integral component of membrane, membrane	SRAE_2000425500	91.9626	SPAL_0000136500	87.2897	SVE_0655900	87.2897	dmsr-1	44.2991
Up in iL3	SSTP_0001111200	-0.16926	-0.616918	-0.948602	-2.44305	-2.55184	-2.50807	-0.62, IQR = -0.78 to -0.39	-2.51, IQR = -2.53 to -2.48	1.94271	0.000666797	0.231107	A0A0K0ENS5	NA	GPCR_Rhodpsn_7TM, 7TM_GPCR_serpentine_rcpt_Srx	integral component of membrane, membrane	NA	NA	SPAL_0001229216	40.5844	SVE_2022700	36.039	NA	NA
Up in iL3	SSTP_0000209200	0.941496	0.656267	1.3135	-0.964294	-0.872734	-0.816587	0.94, IQR = 0.8 to 1.13	-0.87, IQR = -0.92 to -0.84	1.84073	9.00953e-06	4.75423	A0A0K0DXX8	Serpentine receptor class gamma	7TM_GPCR_serpentine_rcpt_Srg	sensory perception of chemical stimulus, transmembrane signaling receptor activity, membrane, integral component of membrane	SRAE_2000414400	69.7368	NA	NA	SVE_2022200	42.9825	NA	NA
Up in iL3	SSTP_0001110100	0.302488	-0.495532	0.0269276	-1.56215	-2.04645	-1.95271	0.03, IQR = -0.23 to 0.16	-1.95, IQR = -2 to -1.76	1.80302	0.0042053	-1.78568	A0A0K0ENR4	NA	NA	membrane, integral component of membrane	SRAE_2000478200	55.7252	SPAL_0000669600	59.1603	SVE_1184100	58.3969	NA	NA
Up in iL3	SSTP_0000937700	-0.744349	-0.132417	-0.449568	-2.78478	-2.27712	-1.64212	-0.45, IQR = -0.6 to -0.29	-2.28, IQR = -2.53 to -1.96	1.79428	0.000411242	0.721953	A0A0K0EIS1	NA	7TM_GPCR_serpentine_rcpt_Sre	sensory perception of chemical stimulus, integral component of membrane, membrane	SRAE_2000494100	50.6711	SPAL_0001434200	35.5705	SVE_0337000	40.9396	NA	NA
Up in iL3	SSTP_0000431100	3.47919	3.60611	3.15428	1.98555	1.54744	1.62053	3.48, IQR = 3.32 to 3.54	1.62, IQR = 1.58 to 1.8	1.7065	6.01762e-08	10.2821	A0A0K0E492	NA	GPCR_Rhodpsn, GPCR_Rhodpsn_7TM	G protein-coupled receptor signaling pathway, G protein-coupled receptor activity, integral component of membrane, membrane	SRAE_X000170800	77.3512	SPAL_0000358300	72.3608	SVE_0664200	69.0979	NA	NA
Up in iL3	SSTP_0000247200	1.78198	1.84021	1.52399	0.448762	-0.0848013	-0.055833	1.78, IQR = 1.65 to 1.81	-0.06, IQR = -0.07 to 0.2	1.62271	0.000133426	1.64216	A0A0K0DZ05	NA	7TM_GPCR_serpentine_rcpt_Srd	membrane, integral component of membrane	SRAE_X000025200	41.2979	SPAL_0001774800	25.0737	SVE_0113600	54.8673	NA	NA
Up in iL3	SSTP_0001016700	1.6156	1.20321	0.934742	-0.0332606	-0.357686	-0.256383	1.2, IQR = 1.07 to 1.41	-0.26, IQR = -0.31 to -0.14	1.48875	5.75272e-05	2.63265	A0A0K0EL23	NA	NA	membrane, integral component of membrane	SRAE_2000432400	64.3836	SPAL_0001382700	61.9863	SVE_0272200	50.6849	NA	NA
Up in iL3	SSTP_0001007400	0.609891	0.157795	-0.134617	-0.66893	-1.75557	-1.10391	0.16, IQR = 0.01 to 0.38	-1.1, IQR = -1.43 to -0.89	1.41675	0.00123994	-0.564306	A0A0K0EKT3	NA	GPCR_Rhodpsn, GPCR_Rhodpsn_7TM, 7TM_GPCR_Srsx	G protein-coupled receptor signaling pathway, G protein-coupled receptor activity, integral component of membrane, membrane	SRAE_2000105700	77.4603	NA	NA	SVE_0515000	70.7936	srsx-25	39.3651
Up in iL3	SSTP_0000697300	4.61177	5.00972	5.10921	3.69886	3.53573	3.31194	5.01, IQR = 4.81 to 5.06	3.54, IQR = 3.42 to 3.62	1.3846	2.32214e-07	8.47642	A0A0K0EBV3	NA	Globin/Proto	oxygen binding, heme binding, membrane, integral component of membrane	SRAE_2000389400	91.1223	SPAL_0000873900	82.2446	SVE_0731600	84.5896	glb-33	31.1558
Up in iL3	SSTP_0000370900	-0.35212	0.367691	0.421304	-1.07623	-1.24425	-1.23744	0.37, IQR = 0.01 to 0.39	-1.24, IQR = -1.24 to -1.16	1.31201	0.00383933	-1.75655	A0A0K0E2J1	NA	7TM_GPCR_serpentine_rcpt_Srv, Srg-33-like	sensory perception of chemical stimulus, transmembrane signaling receptor activity, membrane, integral component of membrane	NA	NA	SPAL_0001029300	62.6374	SVE_0495300	31.044	NA	NA
Up in iL3	SSTP_0000872100	2.94727	3.41707	3.67852	1.98484	2.19786	2.0877	3.42, IQR = 3.18 to 3.55	2.09, IQR = 2.04 to 2.14	1.23845	0.000134441	1.31692	A0A0K0EGW1	NA	NA	membrane, integral component of membrane	SRAE_X000010100	95.3216	SPAL_0000526900	91.8129	SVE_0623400	90.9357	NA	NA
Up in iL3	SSTP_0001168000	-1.28197	-0.554985	-1.72013	-1.56256	-2.40821	-3.1369	-1.28, IQR = -1.5 to -0.92	-2.41, IQR = -2.77 to -1.99	1.19224	0.0297065	-3.67975	A0A0K0EQF1	NA	7TM_GPCR_serpentine_rcpt_Srv	membrane, integral component of membrane	SRAE_1000020200	58.147	SPAL_0001545000	65.8147	SVE_0338500	58.7859	NA	NA
Up in iL3	SSTP_0001161000	4.29338	4.23701	4.53664	3.28553	3.12379	3.17624	4.29, IQR = 4.27 to 4.42	3.18, IQR = 3.15 to 3.23	1.15523	2.87023e-08	11.0306	A0A0K0EQ81	NA	GPCR_Rhodpsn, GPCR_Rhodpsn_7TM, 7TM_GPCR_serpentine_rcpt_Srw	G protein-coupled peptide receptor activity, G protein-coupled receptor signaling pathway, G protein-coupled receptor activity, integral component of membrane, membrane	SRAE_1000078900	75.492	SPAL_0000736000	71.1986	SVE_1029300	72.6297	dmsr-8	29.1592
Up in iL3	SSTP_0001185400	3.27545	3.90788	3.87685	2.70367	2.4987	2.53725	3.88, IQR = 3.58 to 3.89	2.54, IQR = 2.52 to 2.62	1.09538	1.3123e-05	3.88153	A0A0K0EQX3	NA	GPCR_Rhodpsn_7TM	integral component of membrane, membrane	SRAE_1000259700	83.5821	SPAL_0000172100	77.6119	NA	NA	NA	NA
Up in iL3	SSTP_0000442300	3.49527	3.98386	3.99787	3.13097	3.092	3.06892	3.98, IQR = 3.74 to 3.99	3.09, IQR = 3.08 to 3.11	0.718107	0.000868793	-0.866024	A0A0K0E4K3	NA	GPCR_Rhodpsn, GPCR_Rhodpsn_7TM, 7TM_GPCR_serpentine_rcpt_Srx	G protein-coupled receptor signaling pathway, G protein-coupled receptor activity, integral component of membrane, membrane	SRAE_X000198500	92.4812	SPAL_0000671400	86.2155	SVE_0112700	85.7143	npr-19	55.6391
Up in iL3	SSTP_0000287100	1.74869	2.79637	2.34691	1.51378	1.74484	1.75855	2.35, IQR = 2.05 to 2.57	1.74, IQR = 1.63 to 1.75	0.613252	0.011391	-3.37731	A0A0K0E055	NA	GPCR_Rhodpsn, GPCR_Rhodpsn_7TM	G protein-coupled receptor signaling pathway, G protein-coupled receptor activity, integral component of membrane, membrane	SRAE_1000159300	90.099	SPAL_0000795200	85.1485	SVE_1056900	79.2079	F32D8.10	37.1287
Up in iL3	SSTP_0001059800	3.22706	3.63213	3.51185	3.27639	2.85807	2.6791	3.51, IQR = 3.37 to 3.57	2.86, IQR = 2.77 to 3.07	0.512104	0.0261728	-4.45783	A0A0K0EMB0	NA	GPCR_Rhodpsn_7TM	integral component of membrane, membrane	SRAE_X000186100	86.2595	SPAL_0001467100	82.9517	SVE_0819600	47.0738	Y37E11AL.1	40.7125
Up in iL3	SSTP_0001173300	2.81137	2.66233	2.6151	2.31146	1.95135	2.32595	2.66, IQR = 2.64 to 2.74	2.31, IQR = 2.13 to 2.32	0.509876	0.0108009	-3.40813	NA	NA	NA	NA	SRAE_0000033100	72.6384	SPAL_0001592300	71.3355	SVE_0997500	75.57	H09F14.1	33.2248

## Sheet: iL3 vs ppL1
File S6. S. stercoralis chemoreceptor differential gene expression results table: iL3s vs all other life stages
An example .xlsx results file generated by the Strongyloides RNA-seq Browser containing a differential gene expression table listing 64 S. stercoralis chemoreceptors that are consistently upregulated in iL3s versus all other life stages.
S. stercoralis RNA-seq Differential Gene Expression
Contrast: iL3-ppL1
Report generated on March 13, 2021
Columns labeled with <life stage - sample ID> report log2 counts per million (CPM) expression. Columns labeled avg_<life stage> are median log2CPM with IQR. The column labeled logFC reports log2 fold change.
P-values corrected across the following multiple pairwise comparisons: iL3-FLF; iL3-iL3a; iL3-PF; iL3-pfL1; iL3-ppL1; iL3-ppL3
Lists include genes that are differentially regulated in the following directions (relative to the target life stage): Up; Down; NotSig
Percentage of genes for each differential expression pattern: 100
Lists only include genes with matching differential expression descriptions across the following pairwise comparisons: iL3-FLF; iL3-iL3a; iL3-PF; iL3-pfL1; iL3-ppL1; iL3-ppL3
DEG_Desc	geneID	iL3-ERR146947	iL3-ERR146948	iL3-ERR146949	ppL1-ERR146953	ppL1-ERR146954	ppL1-ERR146955	avg_(iL3)	avg_(ppL1)	logFC	BH.adj.P.Val	LogOdds	UniProtKB	Description	InterPro	GO_term	In.subclade_geneID	In.subclade_percent_homology	Out.subclade_geneID	Out.subclade_percent_homology	Out2.subclade_geneID	Out2.subclade_percent_homology	Ce_geneID	Ce_percent_homology
Up in iL3	SSTP_0000425400	1.13079	2.19925	2.5927	-6.22845	-5.17868	-6.76774	2.2, IQR = 1.67 to 2.4	-6.23, IQR = -6.5 to -5.7	7.99159	2.59051e-08	10.5363	A0A0K0E435	Serpentine receptor class gamma	7TM_GPCR_serpentine_rcpt_Srg	sensory perception of chemical stimulus, transmembrane signaling receptor activity, membrane, integral component of membrane	NA	NA	NA	NA	NA	NA	NA	NA
Up in iL3	SSTP_0000564300	1.13265	2.02748	2.1651	-6.22845	-5.18116	-6.76774	2.03, IQR = 1.58 to 2.1	-6.23, IQR = -6.5 to -5.7	7.80605	1.22865e-08	11.2638	A0A0K0E813	NA	7TM_GPCR_serpentine_rcpt_Str	membrane, integral component of membrane	SRAE_1000292700	32.6027	SPAL_0000937875	37.8082	SVE_0037600	24.9315	NA	NA
Up in iL3	SSTP_0000443050	2.09851	2.79944	2.74474	-4.64291	-3.30553	-6.76774	2.74, IQR = 2.42 to 2.77	-4.64, IQR = -5.71 to -3.97	7.44991	3.69188e-08	10.357	A0A0K0E4L1	NA	7TM_GPCR_serpentine_rcpt_Srt	membrane, integral component of membrane	SRAE_X000197650	63.0769	NA	NA	NA	NA	srt-43	21.9231
Up in iL3	SSTP_0000113900	1.27386	1.19763	1.63518	-4.6346	-6.76587	-6.76774	1.27, IQR = 1.24 to 1.45	-6.77, IQR = -6.77 to -5.7	7.41211	1.42242e-09	13.2917	A0A0K0DV71	NA	NA	membrane, integral component of membrane	SRAE_2000471650	78.8732	NA	NA	SVE_0341200	64.7887	NA	NA
Up in iL3	SSTP_0000382000	-0.507025	0.334541	0.260028	-6.22845	-6.76587	-6.76774	0.26, IQR = -0.12 to 0.3	-6.77, IQR = -6.77 to -6.5	6.59806	1.25932e-09	13.2696	A0A0K0E2V1	NA	GPCR_Rhodpsn_7TM, 7TM_GPCR_serpentine_rcpt_Srv, Srg-33-like	sensory perception of chemical stimulus, transmembrane signaling receptor activity, integral component of membrane, membrane	SRAE_2000482800	47.6974	SPAL_0000062700	30.9211	SVE_0238100	31.5789	NA	NA
Up in iL3	SSTP_0000385000	0.964404	0.334184	0.568923	-4.64323	-5.18058	-6.76774	0.57, IQR = 0.45 to 0.77	-5.18, IQR = -5.97 to -4.91	6.18395	4.16411e-07	7.74366	A0A0K0E2Y1	NA	7TM_GPCR_serpentine_rcpt_Sre	sensory perception of chemical stimulus, integral component of membrane, membrane	SRAE_2000498600	74.4108	NA	NA	NA	NA	NA	NA
Up in iL3	SSTP_0001106100	0.647601	0.821824	0.936833	-4.63859	-6.76587	-4.43163	0.82, IQR = 0.73 to 0.88	-4.64, IQR = -5.7 to -4.54	6.10012	1.31892e-09	13.4518	A0A0K0ENM4	NA	7TM_GPCR_serpentine_rcpt_Srv	membrane, integral component of membrane	SRAE_1000020300	25.5172	NA	NA	NA	NA	NA	NA
Up in iL3	SSTP_0000836800	1.93034	2.35566	2.85463	-2.14197	-3.95942	-4.44766	2.36, IQR = 2.14 to 2.61	-3.96, IQR = -4.2 to -3.05	5.93965	5.08593e-08	10.1875	A0A0K0EFW1	NA	7TM_GPCR_serpentine_rcpt_Srt	membrane, integral component of membrane	SRAE_1000322800	47.0588	SPAL_0001660500	38.0952	SVE_1947200	37.2549	NA	NA
Up in iL3	SSTP_0000958500	0.68365	1.78016	1.67705	-3.05892	-3.59629	-6.76774	1.68, IQR = 1.18 to 1.73	-3.6, IQR = -5.18 to -3.33	5.89574	8.60156e-07	7.09619	A0A0K0EJD9	NA	7TM_GPCR_serpentine_rcpt_Srt	membrane, integral component of membrane	SRAE_0000002700	58.6207	SPAL_0001751500	54.8589	SVE_1105400	58.6207	srt-44	28.8401
Up in iL3	SSTP_0000554700	1.879	1.69275	2.19971	-2.76862	-4.44352	-4.44589	1.88, IQR = 1.79 to 2.04	-4.44, IQR = -4.44 to -3.61	5.85263	9.14475e-09	11.9609	A0A0K0E7S2	NA	NA	membrane, integral component of membrane	SRAE_1000279900	60.0649	SPAL_0000683400	55.5195	SVE_0863100	66.8831	NA	NA
Up in iL3	SSTP_0000166700	0.140459	-0.553361	0.907775	-6.22845	-3.95872	-6.76774	0.14, IQR = -0.21 to 0.52	-6.23, IQR = -6.5 to -5.09	5.77871	9.88472e-07	6.84644	A0A0K0DWQ0	NA	7TM_GPCR_serpentine_rcpt_Str	membrane, integral component of membrane	SRAE_0000000250	65.0602	SPAL_0000619700	44.5783	SVE_1102400	19.8795	NA	NA
Up in iL3	SSTP_0000381900	2.00782	2.70187	2.64818	-3.05937	-3.30727	-3.3099	2.65, IQR = 2.33 to 2.68	-3.31, IQR = -3.31 to -3.18	5.67137	1.48829e-09	14.0188	A0A0K0E2V0	NA	7TM_GPCR_serpentine_rcpt_Sre	sensory perception of chemical stimulus, integral component of membrane, membrane	SRAE_2000482900	81.7629	SPAL_0000606300	65.6535	SVE_1566000	66.8693	NA	NA
Up in iL3	SSTP_0000478400	-0.744306	0.194223	0.300968	-4.6443	-6.76587	-5.18404	0.19, IQR = -0.28 to 0.25	-5.18, IQR = -5.97 to -4.91	5.44414	3.59187e-07	7.86599	A0A0K0E5J8	NA	NA	membrane, integral component of membrane	SRAE_2000422600	55.0955	SPAL_0000260300	32.1656	SVE_0059100	22.9299	NA	NA
Up in iL3	SSTP_0001115900	0.422742	1.87416	1.98078	-3.90718	-3.30714	-4.44707	1.87, IQR = 1.15 to 1.93	-3.91, IQR = -4.18 to -3.61	5.27018	3.03728e-07	8.23521	A0A0K0ENX2	NA	GPCR_Rhodpsn_7TM, 7TM_GPCR_Srsx	integral component of membrane, membrane	SRAE_2000450100	48.4472	SPAL_0000411600	19.5652	NA	NA	NA	NA
Up in iL3	SSTP_0000020000	0.681081	0.68302	1.35338	-4.64312	-4.44338	-3.59644	0.68, IQR = 0.68 to 1.02	-4.44, IQR = -4.54 to -4.02	5.09054	8.13716e-08	9.58026	A0A0K0DSI8	Serpentine receptor class gamma	7TM_GPCR_serpentine_rcpt_Srg	sensory perception of chemical stimulus, transmembrane signaling receptor activity, membrane, integral component of membrane	SRAE_1000236400	73.3068	SPAL_0000368200	62.9482	NA	NA	NA	NA
Up in iL3	SSTP_0001111100	-0.305668	-0.328571	-0.078374	-6.22845	-4.44345	-5.18225	-0.31, IQR = -0.32 to -0.19	-5.18, IQR = -5.71 to -4.81	4.99885	4.11723e-08	10.0463	A0A0K0ENS4	NA	GPCR_Rhodpsn_7TM, 7TM_GPCR_serpentine_rcpt_Srx	integral component of membrane, membrane	SRAE_2000476900	56.5693	SPAL_0001229232	55.1095	SVE_1000654750	63.5037	NA	NA
Up in iL3	SSTP_0000425800	3.68275	4.76634	4.69515	-0.557625	-0.745142	-0.581051	4.7, IQR = 4.19 to 4.73	-0.58, IQR = -0.66 to -0.57	4.99675	8.10627e-10	15.1109	A0A0K0E440	NA	GPCR_Rhodpsn, GPCR_Rhodpsn_7TM	G protein-coupled receptor signaling pathway, G protein-coupled receptor activity, integral component of membrane, membrane	SRAE_2000446700	86.4721	NA	NA	SVE_0340900	81.4324	NA	NA
Up in iL3	SSTP_0000554600	0.240778	0.578202	0.2592	-4.64394	-3.59652	-5.18382	0.26, IQR = 0.25 to 0.42	-4.64, IQR = -4.91 to -4.12	4.82815	1.51935e-08	11.2409	A0A0K0E7S1	NA	NA	membrane, integral component of membrane	SRAE_1000280000	72.0721	SPAL_0001687000	63.6637	SVE_0863000	59.1592	NA	NA
Up in iL3	SSTP_0000415000	2.87577	3.42461	3.04149	-1.58549	-1.48134	-1.48408	3.04, IQR = 2.96 to 3.23	-1.48, IQR = -1.53 to -1.48	4.62576	4.043e-11	18.4291	A0A0K0E3T0	NA	7TM_GPCR_serpentine_rcpt_Str	membrane, integral component of membrane	NA	NA	SPAL_0000464500	71.9512	NA	NA	str-182	14.3293
Up in iL3	SSTP_0000346000	5.6919	5.23809	5.64086	0.653693	0.897215	1.14644	5.64, IQR = 5.44 to 5.67	0.9, IQR = 0.78 to 1.02	4.60527	2.09281e-12	22.4964	A0A0K0E1U1	Serpentine receptor class gamma	7TM_GPCR_serpentine_rcpt_Srg	sensory perception of chemical stimulus, transmembrane signaling receptor activity, membrane, integral component of membrane	SRAE_1000032000	78.4	SPAL_0000389200	73.6	SVE_1157700	77.6	NA	NA
Up in iL3	SSTP_0000860100	2.27621	2.33817	2.42656	-2.32225	-1.40898	-2.2456	2.34, IQR = 2.31 to 2.38	-2.25, IQR = -2.28 to -1.83	4.31624	3.63398e-07	8.09353	A0A0K0EGI9	NA	7TM_GPCR_serpentine_rcpt_Srv	membrane, integral component of membrane	SRAE_X000039900	44.0252	NA	NA	NA	NA	NA	NA
Up in iL3	SSTP_0001065400	-0.949065	-0.274961	-0.13351	-2.76862	-4.44354	-6.76774	-0.27, IQR = -0.61 to -0.2	-4.44, IQR = -5.61 to -3.61	4.27546	1.31742e-05	4.23186	A0A0K0EMG5	NA	7TM_GPCR_serpentine_rcpt_Srx	membrane, integral component of membrane	NA	NA	NA	NA	SVE_0366100	54.7468	NA	NA
Up in iL3	SSTP_0000956800	2.78265	3.84805	3.93012	-0.801638	-0.575373	-0.658096	3.85, IQR = 3.32 to 3.89	-0.66, IQR = -0.73 to -0.62	4.1658	3.46494e-08	10.7347	A0A0K0EJC2	NA	7TM_GPCR_serpentine_rcpt_Srt	membrane, integral component of membrane	NA	NA	SPAL_0001749300	59.8485	SVE_1103100	59.4697	srt-43	26.8939
Up in iL3	SSTP_0001190900	4.30874	4.56429	4.65641	1.06698	0.223762	0.0793871	4.56, IQR = 4.44 to 4.61	0.22, IQR = 0.15 to 0.65	4.09223	5.6815e-12	21.2008	A0A0K0ER27	NA	7TM_GPCR_serpentine_rcpt_Srv	membrane, integral component of membrane	SRAE_1000075200	94.5312	SPAL_0000744100	94.9219	SVE_1021000	94.5312	NA	NA
Up in iL3	SSTP_0000207250	0.925011	0.000409147	0.122625	-2.77091	-3.0674	-5.18527	0.12, IQR = 0.06 to 0.52	-3.07, IQR = -4.13 to -2.92	4.0891	4.53519e-06	5.35765	A0A0K0DXV8	NA	GPCR_Rhodpsn_7TM, 7TM_GPCR_serpentine_rcpt_Srd	integral component of membrane, membrane	SRAE_2000412500	16.5803	SPAL_0001736700	29.7927	NA	NA	NA	NA
Up in iL3	SSTP_0000423100	0.797885	0.94634	1.18189	-3.05891	-2.12236	-3.96126	0.95, IQR = 0.87 to 1.06	-3.06, IQR = -3.51 to -2.59	4.01045	1.08372e-06	6.89775	A0A0K0E414	NA	GPCR_Rhodpsn, GPCR_Rhodpsn_7TM, 7TM_GPCR_serpentine_rcpt_Srv, Srg-33-like	G protein-coupled receptor signaling pathway, G protein-coupled receptor activity, sensory perception of chemical stimulus, transmembrane signaling receptor activity, integral component of membrane, membrane	NA	NA	NA	NA	SVE_1568900	50	NA	NA
Up in iL3	SSTP_0000247200	1.78198	1.84021	1.52399	-2.76971	-1.9086	-2.24585	1.78, IQR = 1.65 to 1.81	-2.25, IQR = -2.51 to -2.08	4.00706	1.47646e-07	9.09296	A0A0K0DZ05	NA	7TM_GPCR_serpentine_rcpt_Srd	membrane, integral component of membrane	SRAE_X000025200	41.2979	SPAL_0001774800	25.0737	SVE_0113600	54.8673	NA	NA
Up in iL3	SSTP_0001007400	0.609891	0.157795	-0.134617	-3.90707	-4.44444	-2.86213	0.16, IQR = 0.01 to 0.38	-3.91, IQR = -4.18 to -3.38	3.96124	3.81977e-07	7.9735	A0A0K0EKT3	NA	GPCR_Rhodpsn, GPCR_Rhodpsn_7TM, 7TM_GPCR_Srsx	G protein-coupled receptor signaling pathway, G protein-coupled receptor activity, integral component of membrane, membrane	SRAE_2000105700	77.4603	NA	NA	SVE_0515000	70.7936	srsx-25	39.3651
Up in iL3	SSTP_0001159500	1.82741	2.02805	2.45359	-2.53051	-1.48327	-1.4156	2.03, IQR = 1.93 to 2.24	-1.48, IQR = -2.01 to -1.45	3.85203	1.49758e-08	11.6649	A0A0K0EQ66	NA	GPCR_Rhodpsn, GPCR_Rhodpsn_7TM, 7TM_GPCR_serpentine_rcpt_Srw	G protein-coupled peptide receptor activity, G protein-coupled receptor signaling pathway, G protein-coupled receptor activity, integral component of membrane, membrane	NA	NA	NA	NA	NA	NA	NA	NA
Up in iL3	SSTP_0000537400	0.883331	1.67875	1.77146	-2.52748	-2.12133	-2.24369	1.68, IQR = 1.28 to 1.73	-2.24, IQR = -2.39 to -2.18	3.70512	2.71003e-07	8.4219	A0A0K0E798	NA	7TM_GPCR_serpentine_rcpt_Srd	membrane, integral component of membrane	SRAE_2000459500	55.0523	SPAL_0000036900	14.9826	SVE_0266000	43.554	NA	NA
Up in iL3	SSTP_0000959400	2.11751	2.28757	2.26447	-1.98114	-1.03852	-1.34274	2.26, IQR = 2.19 to 2.28	-1.34, IQR = -1.66 to -1.19	3.64244	4.33288e-10	15.6894	A0A0K0EJE8	NA	GPCR_Rhodpsn_7TM, 7TM_GPCR_serpentine_rcpt_Srx	integral component of membrane, membrane	SRAE_0000012400	70.2875	SPAL_0000022600	61.9808	SVE_0900100	57.1885	srx-46	19.1693
Up in iL3	SSTP_0001016200	1.40321	1.7157	1.94285	-1.96957	-2.36133	-1.31696	1.72, IQR = 1.56 to 1.83	-1.97, IQR = -2.17 to -1.64	3.54885	6.26668e-08	10.0486	A0A0K0EL18	NA	NA	membrane, integral component of membrane	NA	NA	NA	NA	NA	NA	NA	NA
Up in iL3	SSTP_0001182400	0.271504	1.10941	0.851178	-2.32206	-3.06582	-2.52058	0.85, IQR = 0.56 to 0.98	-2.52, IQR = -2.79 to -2.42	3.38363	3.90502e-06	5.51161	A0A0K0EQU3	NA	GPCR_Rhodpsn_7TM, 7TM_GPCR_serpentine_rcpt_Srx	integral component of membrane, membrane	SRAE_1000256800	77.7027	SPAL_0000865400	66.8919	SVE_1042900	66.5541	srx-47	17.5676
Up in iL3	SSTP_0000697000	5.6913	5.94111	6.38069	2.54732	2.82603	2.77262	5.94, IQR = 5.82 to 6.16	2.77, IQR = 2.66 to 2.8	3.27042	9.37365e-12	20.7349	A0A0K0EBV0	NA	NA	membrane, integral component of membrane	SRAE_2000389700	87.4439	SPAL_0000874100	82.7354	SVE_0731300	84.7534	NA	NA
Up in iL3	SSTP_0000993200	3.34598	4.03696	3.50654	0.276548	0.632029	0.192399	3.51, IQR = 3.43 to 3.77	0.28, IQR = 0.23 to 0.45	3.25619	1.42242e-09	14.4528	A0A0K0EKD8	NA	GPCR_Rhodpsn_7TM	integral component of membrane, membrane	SRAE_1000101200	83.6852	SPAL_0000244000	76.5835	SVE_0001600	76.5835	T11F9.1	33.5893
Up in iL3	SSTP_0000356800	0.683939	0.989737	1.08824	-1.98078	-2.24251	-2.12486	0.99, IQR = 0.84 to 1.04	-2.12, IQR = -2.18 to -2.05	3.03275	3.47693e-07	8.14267	A0A0K0E247	NA	7TM_GPCR_serpentine_rcpt_Sri	membrane, integral component of membrane	SRAE_2000169600	55.5901	NA	NA	SVE_1996600	20.4969	NA	NA
Up in iL3	SSTP_0000363000	2.756	3.25524	3.39015	0.145834	0.222116	-0.082748	3.26, IQR = 3.01 to 3.32	0.15, IQR = 0.03 to 0.18	3.02753	2.10999e-10	16.7368	A0A0K0E2A8	NA	GPCR_Rhodpsn, 7TM_GPCR_Srsx	G protein-coupled receptor signaling pathway, G protein-coupled receptor activity, integral component of membrane, membrane	SRAE_2000474200	89.0282	SPAL_0001079400	81.5047	SVE_1655800	81.1912	NA	NA
Up in iL3	SSTP_0001086200	1.80343	1.95184	2.51933	-1.70566	-0.835868	-0.465468	1.95, IQR = 1.88 to 2.24	-0.84, IQR = -1.27 to -0.65	3.02674	7.38268e-08	9.87836	A0A0K0EN24	NA	7TM_GPCR_serpentine_rcpt_Srv	membrane, integral component of membrane	SRAE_1000111700	80.6854	SPAL_0000276400	73.2087	SVE_0085400	67.6012	NA	NA
Up in iL3	SSTP_0000607500	-0.0857237	0.0409005	0.668609	-1.83691	-3.59663	-2.86231	0.04, IQR = -0.02 to 0.35	-2.86, IQR = -3.23 to -2.35	2.99942	1.98698e-05	3.77744	A0A0K0E991	NA	7TM_GPCR_serpentine_rcpt_Srx	membrane, integral component of membrane	NA	NA	SPAL_0001210700	38.5093	SVE_0642600	32.2981	NA	NA
Up in iL3	SSTP_0000431100	3.47919	3.60611	3.15428	0.143795	0.649002	0.610308	3.48, IQR = 3.32 to 3.54	0.61, IQR = 0.38 to 0.63	2.93118	4.8966e-10	15.7387	A0A0K0E492	NA	GPCR_Rhodpsn, GPCR_Rhodpsn_7TM	G protein-coupled receptor signaling pathway, G protein-coupled receptor activity, integral component of membrane, membrane	SRAE_X000170800	77.3512	SPAL_0000358300	72.3608	SVE_0664200	69.0979	NA	NA
Up in iL3	SSTP_0001196800	1.91138	1.98653	2.56709	-0.292556	-1.14508	-0.69013	1.99, IQR = 1.95 to 2.28	-0.69, IQR = -0.92 to -0.49	2.87067	1.08325e-08	12.0745	A0A0K0ER83	NA	7TM_GPCR_serpentine_rcpt_Srd	membrane, integral component of membrane	SRAE_1000223600	62.9412	SPAL_0001395500	47.0588	SVE_1826000	42.3529	NA	NA
Up in iL3	SSTP_0000479900	5.11669	5.05997	5.12674	2.10343	2.38771	2.46591	5.12, IQR = 5.09 to 5.12	2.39, IQR = 2.25 to 2.43	2.76743	1.48779e-12	23.0581	A0A0K0E5L3	NA	GPCR_Rhodpsn_7TM	integral component of membrane, membrane	SRAE_2000421000	57.7259	SPAL_0000141100	52.7697	SVE_0883800	53.0612	C47E8.3	21.137
Up in iL3	SSTP_0001115800	-1.378	-0.132185	-0.597563	-3.42153	-3.30682	-3.59862	-0.6, IQR = -0.99 to -0.36	-3.42, IQR = -3.51 to -3.36	2.72656	0.000121455	1.9052	A0A0K0ENX1	NA	7TM_GPCR_serpentine_rcpt_Sre	sensory perception of chemical stimulus, integral component of membrane, membrane	SRAE_2000450200	28.2392	SPAL_0000411500	46.8439	SVE_1569200	46.5116	NA	NA
Up in iL3	SSTP_0000964100	7.0681	7.4944	7.16413	4.50927	4.43501	4.64056	7.16, IQR = 7.12 to 7.33	4.51, IQR = 4.47 to 4.57	2.71323	5.68465e-12	21.3231	A0A0K0EJJ5	NA	GPCR_Rhodpsn, GPCR_Rhodpsn_7TM, 7TM_GPCR_serpentine_rcpt_Srw	G protein-coupled peptide receptor activity, G protein-coupled receptor signaling pathway, G protein-coupled receptor activity, integral component of membrane, membrane	SRAE_2000425500	91.9626	SPAL_0000136500	87.2897	SVE_0655900	87.2897	dmsr-1	44.2991
Up in iL3	SSTP_0000425000	1.09557	0.810176	1.41181	-1.70602	-1.909	-0.988449	1.1, IQR = 0.95 to 1.25	-1.71, IQR = -1.81 to -1.35	2.61712	2.04864e-05	3.66271	A0A0K0E431	Serpentine receptor class gamma	7TM_GPCR_serpentine_rcpt_Srg	sensory perception of chemical stimulus, transmembrane signaling receptor activity, membrane, integral component of membrane	SRAE_2000446900	35.119	SPAL_0000084400	48.5119	NA	NA	NA	NA
Up in iL3	SSTP_0001250400	4.05255	4.00004	4.35552	1.31625	1.7035	1.75536	4.05, IQR = 4.03 to 4.2	1.7, IQR = 1.51 to 1.73	2.51676	2.95664e-09	13.537	A0A0K0ESS4	NA	GPCR_Rhodpsn_7TM	integral component of membrane, membrane	SRAE_X000114200	94.4573	SPAL_0000696000	86.836	SVE_0624200	86.836	ZK1307.7	44.1109
Up in iL3	SSTP_0000872100	2.94727	3.41707	3.67852	0.0741878	1.28284	1.30154	3.42, IQR = 3.18 to 3.55	1.28, IQR = 0.68 to 1.29	2.38373	4.41886e-07	7.68002	A0A0K0EGW1	NA	NA	membrane, integral component of membrane	SRAE_X000010100	95.3216	SPAL_0000526900	91.8129	SVE_0623400	90.9357	NA	NA
Up in iL3	SSTP_0000937700	-0.744349	-0.132417	-0.449568	-2.76957	-3.3069	-2.37631	-0.45, IQR = -0.6 to -0.29	-2.77, IQR = -3.04 to -2.57	2.3732	4.25378e-05	2.98272	A0A0K0EIS1	NA	7TM_GPCR_serpentine_rcpt_Sre	sensory perception of chemical stimulus, integral component of membrane, membrane	SRAE_2000494100	50.6711	SPAL_0001434200	35.5705	SVE_0337000	40.9396	NA	NA
Up in iL3	SSTP_0000941900	1.8254	0.946637	1.48743	-1.01997	-0.933927	-0.747203	1.49, IQR = 1.22 to 1.66	-0.93, IQR = -0.98 to -0.84	2.31735	6.75362e-07	7.38278	A0A0K0EIW3	NA	7TM_GPCR_serpentine_rcpt_Srv	membrane, integral component of membrane	SRAE_2000512000	71.6867	SPAL_0000410300	65.9639	SVE_1570600	43.0723	NA	NA
Up in iL3	SSTP_0001111200	-0.16926	-0.616918	-0.948602	-2.14114	-3.59601	-2.68093	-0.62, IQR = -0.78 to -0.39	-2.68, IQR = -3.14 to -2.41	2.28267	0.000186484	1.42848	A0A0K0ENS5	NA	GPCR_Rhodpsn_7TM, 7TM_GPCR_serpentine_rcpt_Srx	integral component of membrane, membrane	NA	NA	SPAL_0001229216	40.5844	SVE_2022700	36.039	NA	NA
Up in iL3	SSTP_0001110100	0.302488	-0.495532	0.0269276	-1.97963	-2.37254	-2.51832	0.03, IQR = -0.23 to 0.16	-2.37, IQR = -2.45 to -2.18	2.2553	0.00101255	-0.394196	A0A0K0ENR4	NA	NA	membrane, integral component of membrane	SRAE_2000478200	55.7252	SPAL_0000669600	59.1603	SVE_1184100	58.3969	NA	NA
Up in iL3	SSTP_0000697300	4.61177	5.00972	5.10921	2.33441	2.8138	2.80133	5.01, IQR = 4.81 to 5.06	2.8, IQR = 2.57 to 2.81	2.23254	1.2941e-09	14.4529	A0A0K0EBV3	NA	Globin/Proto	oxygen binding, heme binding, membrane, integral component of membrane	SRAE_2000389400	91.1223	SPAL_0000873900	82.2446	SVE_0731600	84.5896	glb-33	31.1558
Up in iL3	SSTP_0000209200	0.941496	0.656267	1.3135	-0.941253	-1.33749	-1.20947	0.94, IQR = 0.8 to 1.13	-1.21, IQR = -1.27 to -1.08	2.13193	2.22117e-06	6.08347	A0A0K0DXX8	Serpentine receptor class gamma	7TM_GPCR_serpentine_rcpt_Srg	sensory perception of chemical stimulus, transmembrane signaling receptor activity, membrane, integral component of membrane	SRAE_2000414400	69.7368	NA	NA	SVE_2022200	42.9825	NA	NA
Up in iL3	SSTP_0000686100	0.272078	1.23961	1.72445	-0.737159	-1.2745	-1.15414	1.24, IQR = 0.76 to 1.48	-1.15, IQR = -1.21 to -0.95	2.11149	5.60027e-05	2.53605	A0A0K0EBI9	NA	7TM_GPCR_serpentine_rcpt_Srx	membrane, integral component of membrane	SRAE_2000514400	56.9579	SPAL_0000982400	52.1036	SVE_1573100	42.3948	NA	NA
Up in iL3	SSTP_0001185400	3.27545	3.90788	3.87685	1.31655	1.96347	2.07712	3.88, IQR = 3.58 to 3.89	1.96, IQR = 1.64 to 2.02	1.85564	5.87883e-08	9.94061	A0A0K0EQX3	NA	GPCR_Rhodpsn_7TM	integral component of membrane, membrane	SRAE_1000259700	83.5821	SPAL_0000172100	77.6119	NA	NA	NA	NA
Up in iL3	SSTP_0000442300	3.49527	3.98386	3.99787	1.86244	2.09328	1.94624	3.98, IQR = 3.74 to 3.99	1.95, IQR = 1.9 to 2.02	1.84106	8.91647e-08	9.43491	A0A0K0E4K3	NA	GPCR_Rhodpsn, GPCR_Rhodpsn_7TM, 7TM_GPCR_serpentine_rcpt_Srx	G protein-coupled receptor signaling pathway, G protein-coupled receptor activity, integral component of membrane, membrane	SRAE_X000198500	92.4812	SPAL_0000671400	86.2155	SVE_0112700	85.7143	npr-19	55.6391
Up in iL3	SSTP_0000543000	0.659146	1.55632	2.16386	-0.252662	-0.701245	-0.230998	1.56, IQR = 1.11 to 1.86	-0.25, IQR = -0.48 to -0.24	1.82024	0.00269961	-1.68431	A0A0K0E7F3	NA	7TM_GPCR_serpentine_rcpt_Str	membrane, integral component of membrane	SRAE_1000230900	55.6548	SPAL_0000380400	50	SVE_1276100	48.2143	NA	NA
Up in iL3	SSTP_0001016700	1.6156	1.20321	0.934742	-0.500724	-0.426098	-0.659591	1.2, IQR = 1.07 to 1.41	-0.5, IQR = -0.58 to -0.46	1.80203	1.0409e-05	4.33299	A0A0K0EL23	NA	NA	membrane, integral component of membrane	SRAE_2000432400	64.3836	SPAL_0001382700	61.9863	SVE_0272200	50.6849	NA	NA
Up in iL3	SSTP_0001161000	4.29338	4.23701	4.53664	2.52675	2.46693	2.70796	4.29, IQR = 4.27 to 4.42	2.53, IQR = 2.5 to 2.62	1.77995	2.06901e-10	16.7704	A0A0K0EQ81	NA	GPCR_Rhodpsn, GPCR_Rhodpsn_7TM, 7TM_GPCR_serpentine_rcpt_Srw	G protein-coupled peptide receptor activity, G protein-coupled receptor signaling pathway, G protein-coupled receptor activity, integral component of membrane, membrane	SRAE_1000078900	75.492	SPAL_0000736000	71.1986	SVE_1029300	72.6297	dmsr-8	29.1592
Up in iL3	SSTP_0000370900	-0.35212	0.367691	0.421304	-2.14232	-0.98592	-1.15576	0.37, IQR = 0.01 to 0.39	-1.16, IQR = -1.65 to -1.07	1.51121	0.00153077	-0.903524	A0A0K0E2J1	NA	7TM_GPCR_serpentine_rcpt_Srv, Srg-33-like	sensory perception of chemical stimulus, transmembrane signaling receptor activity, membrane, integral component of membrane	NA	NA	SPAL_0001029300	62.6374	SVE_0495300	31.044	NA	NA
Up in iL3	SSTP_0001168000	-1.28197	-0.554985	-1.72013	-2.7701	-2.86003	-2.12565	-1.28, IQR = -1.5 to -0.92	-2.77, IQR = -2.82 to -2.45	1.40535	0.0132804	-2.95759	A0A0K0EQF1	NA	7TM_GPCR_serpentine_rcpt_Srv	membrane, integral component of membrane	SRAE_1000020200	58.147	SPAL_0001545000	65.8147	SVE_0338500	58.7859	NA	NA
Up in iL3	SSTP_0001173300	2.81137	2.66233	2.6151	1.55892	1.68901	1.79726	2.66, IQR = 2.64 to 2.74	1.69, IQR = 1.62 to 1.74	1.01068	5.2203e-05	2.24877	NA	NA	NA	NA	SRAE_0000033100	72.6384	SPAL_0001592300	71.3355	SVE_0997500	75.57	H09F14.1	33.2248
Up in iL3	SSTP_0000287100	1.74869	2.79637	2.34691	1.18748	1.33543	1.29992	2.35, IQR = 2.05 to 2.57	1.3, IQR = 1.24 to 1.32	1.00498	0.000351377	0.238192	A0A0K0E055	NA	GPCR_Rhodpsn, GPCR_Rhodpsn_7TM	G protein-coupled receptor signaling pathway, G protein-coupled receptor activity, integral component of membrane, membrane	SRAE_1000159300	90.099	SPAL_0000795200	85.1485	SVE_1056900	79.2079	F32D8.10	37.1287
Up in iL3	SSTP_0001059800	3.22706	3.63213	3.51185	1.9144	2.58761	2.75813	3.51, IQR = 3.37 to 3.57	2.59, IQR = 2.25 to 2.67	0.998843	0.000287794	0.252524	A0A0K0EMB0	NA	GPCR_Rhodpsn_7TM	integral component of membrane, membrane	SRAE_X000186100	86.2595	SPAL_0001467100	82.9517	SVE_0819600	47.0738	Y37E11AL.1	40.7125

## Sheet: iL3 vs ppL3
File S6. S. stercoralis chemoreceptor differential gene expression results table: iL3s vs all other life stages
An example .xlsx results file generated by the Strongyloides RNA-seq Browser containing a differential gene expression table listing 64 S. stercoralis chemoreceptors that are consistently upregulated in iL3s versus all other life stages.
S. stercoralis RNA-seq Differential Gene Expression
Contrast: iL3-ppL3
Report generated on March 13, 2021
Columns labeled with <life stage - sample ID> report log2 counts per million (CPM) expression. Columns labeled avg_<life stage> are median log2CPM with IQR. The column labeled logFC reports log2 fold change.
P-values corrected across the following multiple pairwise comparisons: iL3-FLF; iL3-iL3a; iL3-PF; iL3-pfL1; iL3-ppL1; iL3-ppL3
Lists include genes that are differentially regulated in the following directions (relative to the target life stage): Up; Down; NotSig
Percentage of genes for each differential expression pattern: 100
Lists only include genes with matching differential expression descriptions across the following pairwise comparisons: iL3-FLF; iL3-iL3a; iL3-PF; iL3-pfL1; iL3-ppL1; iL3-ppL3
DEG_Desc	geneID	iL3-ERR146947	iL3-ERR146948	iL3-ERR146949	ppL3-ERR146956	ppL3-ERR146957	ppL3-ERR146958	avg_(iL3)	avg_(ppL3)	logFC	BH.adj.P.Val	LogOdds	UniProtKB	Description	InterPro	GO_term	In.subclade_geneID	In.subclade_percent_homology	Out.subclade_geneID	Out.subclade_percent_homology	Out2.subclade_geneID	Out2.subclade_percent_homology	Ce_geneID	Ce_percent_homology
Up in iL3	SSTP_0000564300	1.13265	2.02748	2.1651	-4.21581	-6.35401	-6.57495	2.03, IQR = 1.58 to 2.1	-6.35, IQR = -6.46 to -5.28	7.46185	1.7978e-08	10.747	A0A0K0E813	NA	7TM_GPCR_serpentine_rcpt_Str	membrane, integral component of membrane	SRAE_1000292700	32.6027	SPAL_0000937875	37.8082	SVE_0037600	24.9315	NA	NA
Up in iL3	SSTP_0000554700	1.879	1.69275	2.19971	-4.95256	-3.54624	-6.57495	1.88, IQR = 1.79 to 2.04	-4.95, IQR = -5.76 to -4.25	6.96406	5.32395e-09	12.0676	A0A0K0E7S2	NA	NA	membrane, integral component of membrane	SRAE_1000279900	60.0649	SPAL_0000683400	55.5195	SVE_0863100	66.8831	NA	NA
Up in iL3	SSTP_0000113900	1.27386	1.19763	1.63518	-4.20764	-6.35401	-4.23362	1.27, IQR = 1.24 to 1.45	-4.23, IQR = -5.29 to -4.22	6.2634	4.09571e-09	12.325	A0A0K0DV71	NA	NA	membrane, integral component of membrane	SRAE_2000471650	78.8732	NA	NA	SVE_0341200	64.7887	NA	NA
Up in iL3	SSTP_0000958500	0.68365	1.78016	1.67705	-4.21614	-6.35401	-3.76869	1.68, IQR = 1.18 to 1.73	-4.22, IQR = -5.29 to -3.99	6.10628	8.75574e-07	6.92325	A0A0K0EJD9	NA	7TM_GPCR_serpentine_rcpt_Srt	membrane, integral component of membrane	SRAE_0000002700	58.6207	SPAL_0001751500	54.8589	SVE_1105400	58.6207	srt-44	28.8401
Up in iL3	SSTP_0000425400	1.13079	2.19925	2.5927	-4.21403	-3.54457	-4.24961	2.2, IQR = 1.67 to 2.4	-4.21, IQR = -4.23 to -3.88	5.94462	9.32097e-08	9.32866	A0A0K0E435	Serpentine receptor class gamma	7TM_GPCR_serpentine_rcpt_Srg	sensory perception of chemical stimulus, transmembrane signaling receptor activity, membrane, integral component of membrane	NA	NA	NA	NA	NA	NA	NA	NA
Up in iL3	SSTP_0000443050	2.09851	2.79944	2.74474	-3.07809	-3.54639	-2.32561	2.74, IQR = 2.42 to 2.77	-3.08, IQR = -3.31 to -2.7	5.50292	7.8995e-08	9.58262	A0A0K0E4L1	NA	7TM_GPCR_serpentine_rcpt_Srt	membrane, integral component of membrane	SRAE_X000197650	63.0769	NA	NA	NA	NA	srt-43	21.9231
Up in iL3	SSTP_0000382000	-0.507025	0.334541	0.260028	-6.53803	-4.76876	-4.99005	0.26, IQR = -0.12 to 0.3	-4.99, IQR = -5.76 to -4.88	5.45104	1.0227e-08	11.2207	A0A0K0E2V1	NA	GPCR_Rhodpsn_7TM, 7TM_GPCR_serpentine_rcpt_Srv, Srg-33-like	sensory perception of chemical stimulus, transmembrane signaling receptor activity, integral component of membrane, membrane	SRAE_2000482800	47.6974	SPAL_0000062700	30.9211	SVE_0238100	31.5789	NA	NA
Up in iL3	SSTP_0001106100	0.647601	0.821824	0.936833	-4.21243	-4.76665	-4.97861	0.82, IQR = 0.73 to 0.88	-4.77, IQR = -4.87 to -4.49	5.44536	2.19768e-09	12.9722	A0A0K0ENM4	NA	7TM_GPCR_serpentine_rcpt_Srv	membrane, integral component of membrane	SRAE_1000020300	25.5172	NA	NA	NA	NA	NA	NA
Up in iL3	SSTP_0000836800	1.93034	2.35566	2.85463	-2.29045	-3.54725	-3.40729	2.36, IQR = 2.14 to 2.61	-3.41, IQR = -3.48 to -2.85	5.42808	7.9464e-08	9.56908	A0A0K0EFW1	NA	7TM_GPCR_serpentine_rcpt_Srt	membrane, integral component of membrane	SRAE_1000322800	47.0588	SPAL_0001660500	38.0952	SVE_1947200	37.2549	NA	NA
Up in iL3	SSTP_0000247200	1.78198	1.84021	1.52399	-2.63133	-4.03249	-3.76928	1.78, IQR = 1.65 to 1.81	-3.77, IQR = -3.9 to -3.2	5.19358	3.51064e-08	10.3894	A0A0K0DZ05	NA	7TM_GPCR_serpentine_rcpt_Srd	membrane, integral component of membrane	SRAE_X000025200	41.2979	SPAL_0001774800	25.0737	SVE_0113600	54.8673	NA	NA
Up in iL3	SSTP_0001190900	4.30874	4.56429	4.65641	-0.560378	-0.0500349	-0.690756	4.56, IQR = 4.44 to 4.61	-0.56, IQR = -0.63 to -0.31	4.94764	3.25418e-12	21.2561	A0A0K0ER27	NA	7TM_GPCR_serpentine_rcpt_Srv	membrane, integral component of membrane	SRAE_1000075200	94.5312	SPAL_0000744100	94.9219	SVE_1021000	94.5312	NA	NA
Up in iL3	SSTP_0000554600	0.240778	0.578202	0.2592	-4.95318	-4.76936	-3.76912	0.26, IQR = 0.25 to 0.42	-4.77, IQR = -4.86 to -4.27	4.85156	1.39241e-08	11.1395	A0A0K0E7S1	NA	NA	membrane, integral component of membrane	SRAE_1000280000	72.0721	SPAL_0001687000	63.6637	SVE_0863000	59.1592	NA	NA
Up in iL3	SSTP_0000381900	2.00782	2.70187	2.64818	-2.14615	-2.65428	-2.32889	2.65, IQR = 2.33 to 2.68	-2.33, IQR = -2.49 to -2.24	4.8082	2.83127e-09	13.2318	A0A0K0E2V0	NA	7TM_GPCR_serpentine_rcpt_Sre	sensory perception of chemical stimulus, integral component of membrane, membrane	SRAE_2000482900	81.7629	SPAL_0000606300	65.6535	SVE_1566000	66.8693	NA	NA
Up in iL3	SSTP_0000415000	2.87577	3.42461	3.04149	-1.32902	-1.71088	-1.82193	3.04, IQR = 2.96 to 3.23	-1.71, IQR = -1.77 to -1.52	4.73248	3.15595e-11	18.3073	A0A0K0E3T0	NA	7TM_GPCR_serpentine_rcpt_Str	membrane, integral component of membrane	NA	NA	SPAL_0000464500	71.9512	NA	NA	str-182	14.3293
Up in iL3	SSTP_0000959400	2.11751	2.28757	2.26447	-2.83787	-1.96224	-2.66933	2.26, IQR = 2.19 to 2.28	-2.67, IQR = -2.75 to -2.32	4.72015	8.21294e-11	16.9945	A0A0K0EJE8	NA	GPCR_Rhodpsn_7TM, 7TM_GPCR_serpentine_rcpt_Srx	integral component of membrane, membrane	SRAE_0000012400	70.2875	SPAL_0000022600	61.9808	SVE_0900100	57.1885	srx-46	19.1693
Up in iL3	SSTP_0000425800	3.68275	4.76634	4.69515	-0.0959099	-0.627257	-0.0705373	4.7, IQR = 4.19 to 4.73	-0.1, IQR = -0.36 to -0.08	4.61875	1.01075e-09	14.5753	A0A0K0E440	NA	GPCR_Rhodpsn, GPCR_Rhodpsn_7TM	G protein-coupled receptor signaling pathway, G protein-coupled receptor activity, integral component of membrane, membrane	SRAE_2000446700	86.4721	NA	NA	SVE_0340900	81.4324	NA	NA
Up in iL3	SSTP_0001115900	0.422742	1.87416	1.98078	-2.45093	-2.8952	-4.25439	1.87, IQR = 1.15 to 1.93	-2.9, IQR = -3.57 to -2.67	4.59353	6.0716e-07	7.37519	A0A0K0ENX2	NA	GPCR_Rhodpsn_7TM, 7TM_GPCR_Srsx	integral component of membrane, membrane	SRAE_2000450100	48.4472	SPAL_0000411600	19.5652	NA	NA	NA	NA
Up in iL3	SSTP_0000385000	0.964404	0.334184	0.568923	-2.83704	-4.76882	-4.25299	0.57, IQR = 0.45 to 0.77	-4.25, IQR = -4.51 to -3.55	4.57145	2.24881e-06	5.96918	A0A0K0E2Y1	NA	7TM_GPCR_serpentine_rcpt_Sre	sensory perception of chemical stimulus, integral component of membrane, membrane	SRAE_2000498600	74.4108	NA	NA	NA	NA	NA	NA
Up in iL3	SSTP_0000478400	-0.744306	0.194223	0.300968	-4.21679	-4.76981	-4.99129	0.19, IQR = -0.28 to 0.25	-4.77, IQR = -4.88 to -4.49	4.54949	1.18668e-06	6.59127	A0A0K0E5J8	NA	NA	membrane, integral component of membrane	SRAE_2000422600	55.0955	SPAL_0000260300	32.1656	SVE_0059100	22.9299	NA	NA
Up in iL3	SSTP_0000956800	2.78265	3.84805	3.93012	-0.704833	-0.331602	-2.05038	3.85, IQR = 3.32 to 3.89	-0.7, IQR = -1.38 to -0.52	4.5444	2.33643e-08	10.9566	A0A0K0EJC2	NA	7TM_GPCR_serpentine_rcpt_Srt	membrane, integral component of membrane	NA	NA	SPAL_0001749300	59.8485	SVE_1103100	59.4697	srt-43	26.8939
Up in iL3	SSTP_0000020000	0.681081	0.68302	1.35338	-3.73065	-4.76914	-2.48609	0.68, IQR = 0.68 to 1.02	-3.73, IQR = -4.25 to -3.11	4.5214	1.59126e-07	8.76658	A0A0K0DSI8	Serpentine receptor class gamma	7TM_GPCR_serpentine_rcpt_Srg	sensory perception of chemical stimulus, transmembrane signaling receptor activity, membrane, integral component of membrane	SRAE_1000236400	73.3068	SPAL_0000368200	62.9482	NA	NA	NA	NA
Up in iL3	SSTP_0001182400	0.271504	1.10941	0.851178	-3.3684	-2.89511	-4.99055	0.85, IQR = 0.56 to 0.98	-3.37, IQR = -4.18 to -3.13	4.50105	5.99227e-07	7.36639	A0A0K0EQU3	NA	GPCR_Rhodpsn_7TM, 7TM_GPCR_serpentine_rcpt_Srx	integral component of membrane, membrane	SRAE_1000256800	77.7027	SPAL_0000865400	66.8919	SVE_1042900	66.5541	srx-47	17.5676
Up in iL3	SSTP_0000207250	0.925011	0.000409147	0.122625	-3.3692	-4.77012	-3.77101	0.12, IQR = 0.06 to 0.52	-3.77, IQR = -4.27 to -3.57	4.32506	3.50708e-06	5.49981	A0A0K0DXV8	NA	GPCR_Rhodpsn_7TM, 7TM_GPCR_serpentine_rcpt_Srd	integral component of membrane, membrane	SRAE_2000412500	16.5803	SPAL_0001736700	29.7927	NA	NA	NA	NA
Up in iL3	SSTP_0001016200	1.40321	1.7157	1.94285	-3.72623	-1.39197	-2.64576	1.72, IQR = 1.56 to 1.83	-2.65, IQR = -3.19 to -2.02	4.282	1.7545e-08	11.2093	A0A0K0EL18	NA	NA	membrane, integral component of membrane	NA	NA	NA	NA	NA	NA	NA	NA
Up in iL3	SSTP_0001159500	1.82741	2.02805	2.45359	-2.01578	-2.89624	-1.72258	2.03, IQR = 1.93 to 2.24	-2.02, IQR = -2.46 to -1.87	4.28006	7.35698e-09	12.1875	A0A0K0EQ66	NA	GPCR_Rhodpsn, GPCR_Rhodpsn_7TM, 7TM_GPCR_serpentine_rcpt_Srw	G protein-coupled peptide receptor activity, G protein-coupled receptor signaling pathway, G protein-coupled receptor activity, integral component of membrane, membrane	NA	NA	NA	NA	NA	NA	NA	NA
Up in iL3	SSTP_0000425000	1.09557	0.810176	1.41181	-3.07918	-2.65445	-3.76959	1.1, IQR = 0.95 to 1.25	-3.08, IQR = -3.42 to -2.87	4.27211	6.59399e-07	7.28241	A0A0K0E431	Serpentine receptor class gamma	7TM_GPCR_serpentine_rcpt_Srg	sensory perception of chemical stimulus, transmembrane signaling receptor activity, membrane, integral component of membrane	SRAE_2000446900	35.119	SPAL_0000084400	48.5119	NA	NA	NA	NA
Up in iL3	SSTP_0000346000	5.6919	5.23809	5.64086	1.37986	1.51835	0.883979	5.64, IQR = 5.44 to 5.67	1.38, IQR = 1.13 to 1.45	4.27058	2.30147e-12	22.033	A0A0K0E1U1	Serpentine receptor class gamma	7TM_GPCR_serpentine_rcpt_Srg	sensory perception of chemical stimulus, transmembrane signaling receptor activity, membrane, integral component of membrane	SRAE_1000032000	78.4	SPAL_0000389200	73.6	SVE_1157700	77.6	NA	NA
Up in iL3	SSTP_0000697000	5.6913	5.94111	6.38069	1.82272	1.80929	1.63451	5.94, IQR = 5.82 to 6.16	1.81, IQR = 1.72 to 1.82	4.24269	1.60152e-12	22.565	A0A0K0EBV0	NA	NA	membrane, integral component of membrane	SRAE_2000389700	87.4439	SPAL_0000874100	82.7354	SVE_0731300	84.7534	NA	NA
Up in iL3	SSTP_0001111100	-0.305668	-0.328571	-0.078374	-4.21579	-4.032	-4.98947	-0.31, IQR = -0.32 to -0.19	-4.22, IQR = -4.6 to -4.12	4.17603	1.26899e-07	8.89226	A0A0K0ENS4	NA	GPCR_Rhodpsn_7TM, 7TM_GPCR_serpentine_rcpt_Srx	integral component of membrane, membrane	SRAE_2000476900	56.5693	SPAL_0001229232	55.1095	SVE_1000654750	63.5037	NA	NA
Up in iL3	SSTP_0000363000	2.756	3.25524	3.39015	-1.32893	-0.626724	-1.15024	3.26, IQR = 3.01 to 3.32	-1.15, IQR = -1.24 to -0.89	4.16351	3.09191e-11	18.4661	A0A0K0E2A8	NA	GPCR_Rhodpsn, 7TM_GPCR_Srsx	G protein-coupled receptor signaling pathway, G protein-coupled receptor activity, integral component of membrane, membrane	SRAE_2000474200	89.0282	SPAL_0001079400	81.5047	SVE_1655800	81.1912	NA	NA
Up in iL3	SSTP_0000423100	0.797885	0.94634	1.18189	-2.01457	-3.18442	-4.25388	0.95, IQR = 0.87 to 1.06	-3.18, IQR = -3.72 to -2.6	4.11786	9.284e-07	6.91577	A0A0K0E414	NA	GPCR_Rhodpsn, GPCR_Rhodpsn_7TM, 7TM_GPCR_serpentine_rcpt_Srv, Srg-33-like	G protein-coupled receptor signaling pathway, G protein-coupled receptor activity, sensory perception of chemical stimulus, transmembrane signaling receptor activity, integral component of membrane, membrane	NA	NA	NA	NA	SVE_1568900	50	NA	NA
Up in iL3	SSTP_0000479900	5.11669	5.05997	5.12674	1.26102	1.45742	0.868863	5.12, IQR = 5.09 to 5.12	1.26, IQR = 1.06 to 1.36	3.91344	1.81779e-13	25.525	A0A0K0E5L3	NA	GPCR_Rhodpsn_7TM	integral component of membrane, membrane	SRAE_2000421000	57.7259	SPAL_0000141100	52.7697	SVE_0883800	53.0612	C47E8.3	21.137
Up in iL3	SSTP_0000543000	0.659146	1.55632	2.16386	-2.29103	-1.96292	-2.87697	1.56, IQR = 1.11 to 1.86	-2.29, IQR = -2.58 to -2.13	3.80233	3.0549e-05	3.15363	A0A0K0E7F3	NA	7TM_GPCR_serpentine_rcpt_Str	membrane, integral component of membrane	SRAE_1000230900	55.6548	SPAL_0000380400	50	SVE_1276100	48.2143	NA	NA
Up in iL3	SSTP_0001196800	1.91138	1.98653	2.56709	-1.67704	-1.30683	-1.92009	1.99, IQR = 1.95 to 2.28	-1.68, IQR = -1.8 to -1.49	3.77641	1.55124e-09	13.9728	A0A0K0ER83	NA	7TM_GPCR_serpentine_rcpt_Srd	membrane, integral component of membrane	SRAE_1000223600	62.9412	SPAL_0001395500	47.0588	SVE_1826000	42.3529	NA	NA
Up in iL3	SSTP_0000941900	1.8254	0.946637	1.48743	-1.68053	-2.8953	-2.48945	1.49, IQR = 1.22 to 1.66	-2.49, IQR = -2.69 to -2.08	3.76998	1.4017e-08	11.463	A0A0K0EIW3	NA	7TM_GPCR_serpentine_rcpt_Srv	membrane, integral component of membrane	SRAE_2000512000	71.6867	SPAL_0000410300	65.9639	SVE_1570600	43.0723	NA	NA
Up in iL3	SSTP_0000993200	3.34598	4.03696	3.50654	0.0898632	-0.523014	0.239322	3.51, IQR = 3.43 to 3.77	0.09, IQR = -0.22 to 0.16	3.68131	7.27653e-10	14.9637	A0A0K0EKD8	NA	GPCR_Rhodpsn_7TM	integral component of membrane, membrane	SRAE_1000101200	83.6852	SPAL_0000244000	76.5835	SVE_0001600	76.5835	T11F9.1	33.5893
Up in iL3	SSTP_0000356800	0.683939	0.989737	1.08824	-2.83743	-2.8947	-2.32812	0.99, IQR = 0.84 to 1.04	-2.84, IQR = -2.87 to -2.58	3.59058	9.72264e-08	9.35089	A0A0K0E247	NA	7TM_GPCR_serpentine_rcpt_Sri	membrane, integral component of membrane	SRAE_2000169600	55.5901	NA	NA	SVE_1996600	20.4969	NA	NA
Up in iL3	SSTP_0000166700	0.140459	-0.553361	0.907775	-3.36789	-2.65363	-4.2541	0.14, IQR = -0.21 to 0.52	-3.37, IQR = -3.81 to -3.01	3.57739	1.97037e-05	3.68575	A0A0K0DWQ0	NA	7TM_GPCR_serpentine_rcpt_Str	membrane, integral component of membrane	SRAE_0000000250	65.0602	SPAL_0000619700	44.5783	SVE_1102400	19.8795	NA	NA
Up in iL3	SSTP_0001115800	-1.378	-0.132185	-0.597563	-3.73091	-4.7694	-4.25378	-0.6, IQR = -0.99 to -0.36	-4.25, IQR = -4.51 to -3.99	3.52599	1.8752e-05	3.75577	A0A0K0ENX1	NA	7TM_GPCR_serpentine_rcpt_Sre	sensory perception of chemical stimulus, integral component of membrane, membrane	SRAE_2000450200	28.2392	SPAL_0000411500	46.8439	SVE_1569200	46.5116	NA	NA
Up in iL3	SSTP_0000537400	0.883331	1.67875	1.77146	-2.01382	-1.59877	-2.48703	1.68, IQR = 1.28 to 1.73	-2.01, IQR = -2.25 to -1.81	3.46393	4.24053e-07	7.76429	A0A0K0E798	NA	7TM_GPCR_serpentine_rcpt_Srd	membrane, integral component of membrane	SRAE_2000459500	55.0523	SPAL_0000036900	14.9826	SVE_0266000	43.554	NA	NA
Up in iL3	SSTP_0000964100	7.0681	7.4944	7.16413	3.90857	3.93748	3.56231	7.16, IQR = 7.12 to 7.33	3.91, IQR = 3.74 to 3.92	3.44283	5.00928e-13	24.1833	A0A0K0EJJ5	NA	GPCR_Rhodpsn, GPCR_Rhodpsn_7TM, 7TM_GPCR_serpentine_rcpt_Srw	G protein-coupled peptide receptor activity, G protein-coupled receptor signaling pathway, G protein-coupled receptor activity, integral component of membrane, membrane	SRAE_2000425500	91.9626	SPAL_0000136500	87.2897	SVE_0655900	87.2897	dmsr-1	44.2991
Up in iL3	SSTP_0000697300	4.61177	5.00972	5.10921	1.79569	2.02321	1.69909	5.01, IQR = 4.81 to 5.06	1.8, IQR = 1.75 to 1.91	3.0682	7.26664e-11	17.7135	A0A0K0EBV3	NA	Globin/Proto	oxygen binding, heme binding, membrane, integral component of membrane	SRAE_2000389400	91.1223	SPAL_0000873900	82.2446	SVE_0731600	84.5896	glb-33	31.1558
Up in iL3	SSTP_0001110100	0.302488	-0.495532	0.0269276	-1.49299	-4.03176	-3.76631	0.03, IQR = -0.23 to 0.16	-3.77, IQR = -3.9 to -2.63	3.03054	0.000147586	1.57176	A0A0K0ENR4	NA	NA	membrane, integral component of membrane	SRAE_2000478200	55.7252	SPAL_0000669600	59.1603	SVE_1184100	58.3969	NA	NA
Up in iL3	SSTP_0001065400	-0.949065	-0.274961	-0.13351	-3.07786	-4.03166	-3.40532	-0.27, IQR = -0.61 to -0.2	-3.41, IQR = -3.72 to -3.24	3.02335	0.000154094	1.5565	A0A0K0EMG5	NA	7TM_GPCR_serpentine_rcpt_Srx	membrane, integral component of membrane	NA	NA	NA	NA	SVE_0366100	54.7468	NA	NA
Up in iL3	SSTP_0001185400	3.27545	3.90788	3.87685	0.559026	0.74267	0.733947	3.88, IQR = 3.58 to 3.89	0.73, IQR = 0.65 to 0.74	2.99749	9.21279e-10	14.6869	A0A0K0EQX3	NA	GPCR_Rhodpsn_7TM	integral component of membrane, membrane	SRAE_1000259700	83.5821	SPAL_0000172100	77.6119	NA	NA	NA	NA
Up in iL3	SSTP_0001016700	1.6156	1.20321	0.934742	-1.40879	-1.7105	-1.62116	1.2, IQR = 1.07 to 1.41	-1.62, IQR = -1.67 to -1.51	2.84896	2.03939e-07	8.56409	A0A0K0EL23	NA	NA	membrane, integral component of membrane	SRAE_2000432400	64.3836	SPAL_0001382700	61.9863	SVE_0272200	50.6849	NA	NA
Up in iL3	SSTP_0000431100	3.47919	3.60611	3.15428	0.640412	0.609859	0.538074	3.48, IQR = 3.32 to 3.54	0.61, IQR = 0.57 to 0.63	2.82759	5.84937e-10	15.2251	A0A0K0E492	NA	GPCR_Rhodpsn, GPCR_Rhodpsn_7TM	G protein-coupled receptor signaling pathway, G protein-coupled receptor activity, integral component of membrane, membrane	SRAE_X000170800	77.3512	SPAL_0000358300	72.3608	SVE_0664200	69.0979	NA	NA
Up in iL3	SSTP_0001086200	1.80343	1.95184	2.51933	-0.163368	-0.800078	-1.08474	1.95, IQR = 1.88 to 2.24	-0.8, IQR = -0.94 to -0.48	2.75084	1.45815e-07	8.90827	A0A0K0EN24	NA	7TM_GPCR_serpentine_rcpt_Srv	membrane, integral component of membrane	SRAE_1000111700	80.6854	SPAL_0000276400	73.2087	SVE_0085400	67.6012	NA	NA
Up in iL3	SSTP_0001161000	4.29338	4.23701	4.53664	1.51023	1.75768	1.62325	4.29, IQR = 4.27 to 4.42	1.62, IQR = 1.57 to 1.69	2.72265	3.45818e-12	21.4817	A0A0K0EQ81	NA	GPCR_Rhodpsn, GPCR_Rhodpsn_7TM, 7TM_GPCR_serpentine_rcpt_Srw	G protein-coupled peptide receptor activity, G protein-coupled receptor signaling pathway, G protein-coupled receptor activity, integral component of membrane, membrane	SRAE_1000078900	75.492	SPAL_0000736000	71.1986	SVE_1029300	72.6297	dmsr-8	29.1592
Up in iL3	SSTP_0001111200	-0.16926	-0.616918	-0.948602	-3.36797	-3.54676	-2.87521	-0.62, IQR = -0.78 to -0.39	-3.37, IQR = -3.46 to -3.12	2.69799	5.4728e-05	2.62634	A0A0K0ENS5	NA	GPCR_Rhodpsn_7TM, 7TM_GPCR_serpentine_rcpt_Srx	integral component of membrane, membrane	NA	NA	SPAL_0001229216	40.5844	SVE_2022700	36.039	NA	NA
Up in iL3	SSTP_0000370900	-0.35212	0.367691	0.421304	-2.29076	-2.44809	-2.67088	0.37, IQR = 0.01 to 0.39	-2.45, IQR = -2.56 to -2.37	2.59694	2.44537e-05	3.4277	A0A0K0E2J1	NA	7TM_GPCR_serpentine_rcpt_Srv, Srg-33-like	sensory perception of chemical stimulus, transmembrane signaling receptor activity, membrane, integral component of membrane	NA	NA	SPAL_0001029300	62.6374	SVE_0495300	31.044	NA	NA
Up in iL3	SSTP_0001007400	0.609891	0.157795	-0.134617	-1.89448	-2.26711	-2.48884	0.16, IQR = 0.01 to 0.38	-2.27, IQR = -2.38 to -2.08	2.44887	1.65831e-05	3.8317	A0A0K0EKT3	NA	GPCR_Rhodpsn, GPCR_Rhodpsn_7TM, 7TM_GPCR_Srsx	G protein-coupled receptor signaling pathway, G protein-coupled receptor activity, integral component of membrane, membrane	SRAE_2000105700	77.4603	NA	NA	SVE_0515000	70.7936	srsx-25	39.3651
Up in iL3	SSTP_0001173300	2.81137	2.66233	2.6151	0.00090116	0.722305	0.389736	2.66, IQR = 2.64 to 2.74	0.39, IQR = 0.2 to 0.56	2.33931	1.74603e-08	11.2621	NA	NA	NA	NA	SRAE_0000033100	72.6384	SPAL_0001592300	71.3355	SVE_0997500	75.57	H09F14.1	33.2248
Up in iL3	SSTP_0001250400	4.05255	4.00004	4.35552	1.94061	2.0749	1.53417	4.05, IQR = 4.03 to 4.2	1.94, IQR = 1.74 to 2.01	2.28572	6.23629e-09	12.333	A0A0K0ESS4	NA	GPCR_Rhodpsn_7TM	integral component of membrane, membrane	SRAE_X000114200	94.4573	SPAL_0000696000	86.836	SVE_0624200	86.836	ZK1307.7	44.1109
Up in iL3	SSTP_0000872100	2.94727	3.41707	3.67852	1.50032	1.01142	0.840499	3.42, IQR = 3.18 to 3.55	1.01, IQR = 0.93 to 1.26	2.21149	7.76696e-07	6.84006	A0A0K0EGW1	NA	NA	membrane, integral component of membrane	SRAE_X000010100	95.3216	SPAL_0000526900	91.8129	SVE_0623400	90.9357	NA	NA
Up in iL3	SSTP_0000442300	3.49527	3.98386	3.99787	1.90809	1.5334	1.60599	3.98, IQR = 3.74 to 3.99	1.61, IQR = 1.57 to 1.76	2.12978	2.16689e-08	10.8907	A0A0K0E4K3	NA	GPCR_Rhodpsn, GPCR_Rhodpsn_7TM, 7TM_GPCR_serpentine_rcpt_Srx	G protein-coupled receptor signaling pathway, G protein-coupled receptor activity, integral component of membrane, membrane	SRAE_X000198500	92.4812	SPAL_0000671400	86.2155	SVE_0112700	85.7143	npr-19	55.6391
Up in iL3	SSTP_0000209200	0.941496	0.656267	1.3135	-0.755771	-0.861429	-1.21375	0.94, IQR = 0.8 to 1.13	-0.86, IQR = -1.04 to -0.81	1.90227	6.46291e-06	4.75457	A0A0K0DXX8	Serpentine receptor class gamma	7TM_GPCR_serpentine_rcpt_Srg	sensory perception of chemical stimulus, transmembrane signaling receptor activity, membrane, integral component of membrane	SRAE_2000414400	69.7368	NA	NA	SVE_2022200	42.9825	NA	NA
Up in iL3	SSTP_0000860100	2.27621	2.33817	2.42656	0.845324	0.245275	0.718121	2.34, IQR = 2.31 to 2.38	0.72, IQR = 0.48 to 0.78	1.7297	0.000189976	0.872443	A0A0K0EGI9	NA	7TM_GPCR_serpentine_rcpt_Srv	membrane, integral component of membrane	SRAE_X000039900	44.0252	NA	NA	NA	NA	NA	NA
Up in iL3	SSTP_0000607500	-0.0857237	0.0409005	0.668609	-0.810491	-2.65421	-1.15036	0.04, IQR = -0.02 to 0.35	-1.15, IQR = -1.9 to -0.98	1.69835	0.00143276	-0.915048	A0A0K0E991	NA	7TM_GPCR_serpentine_rcpt_Srx	membrane, integral component of membrane	NA	NA	SPAL_0001210700	38.5093	SVE_0642600	32.2981	NA	NA
Up in iL3	SSTP_0000937700	-0.744349	-0.132417	-0.449568	-1.78352	-1.96231	-2.66898	-0.45, IQR = -0.6 to -0.29	-1.96, IQR = -2.32 to -1.87	1.69698	0.000609204	0.0557293	A0A0K0EIS1	NA	7TM_GPCR_serpentine_rcpt_Sre	sensory perception of chemical stimulus, integral component of membrane, membrane	SRAE_2000494100	50.6711	SPAL_0001434200	35.5705	SVE_0337000	40.9396	NA	NA
Up in iL3	SSTP_0001168000	-1.28197	-0.554985	-1.72013	-2.45136	-2.10714	-2.66983	-1.28, IQR = -1.5 to -0.92	-2.45, IQR = -2.56 to -2.28	1.24644	0.0235506	-3.60301	A0A0K0EQF1	NA	7TM_GPCR_serpentine_rcpt_Srv	membrane, integral component of membrane	SRAE_1000020200	58.147	SPAL_0001545000	65.8147	SVE_0338500	58.7859	NA	NA
Up in iL3	SSTP_0000686100	0.272078	1.23961	1.72445	-0.348457	-0.377249	0.294224	1.24, IQR = 0.76 to 1.48	-0.35, IQR = -0.36 to -0.03	1.17202	0.00412098	-2.20416	A0A0K0EBI9	NA	7TM_GPCR_serpentine_rcpt_Srx	membrane, integral component of membrane	SRAE_2000514400	56.9579	SPAL_0000982400	52.1036	SVE_1573100	42.3948	NA	NA
Up in iL3	SSTP_0001059800	3.22706	3.63213	3.51185	2.34063	2.54857	2.07589	3.51, IQR = 3.37 to 3.57	2.34, IQR = 2.21 to 2.44	1.13645	9.03251e-05	1.41404	A0A0K0EMB0	NA	GPCR_Rhodpsn_7TM	integral component of membrane, membrane	SRAE_X000186100	86.2595	SPAL_0001467100	82.9517	SVE_0819600	47.0738	Y37E11AL.1	40.7125
Up in iL3	SSTP_0000287100	1.74869	2.79637	2.34691	1.26188	0.993354	1.52429	2.35, IQR = 2.05 to 2.57	1.26, IQR = 1.13 to 1.39	1.01748	0.000331413	0.204868	A0A0K0E055	NA	GPCR_Rhodpsn, GPCR_Rhodpsn_7TM	G protein-coupled receptor signaling pathway, G protein-coupled receptor activity, integral component of membrane, membrane	SRAE_1000159300	90.099	SPAL_0000795200	85.1485	SVE_1056900	79.2079	F32D8.10	37.1287
